# Supplementary material for: SARS-CoV-2 seroprevalence on the north coast of Peru: A cross-sectional study after the first wave
Source: PLoS Negl Trop Dis. 2023 Jun 28;17(6):e0010794. doi: 10.1371/journal.pntd.0010794 (PMC10335682; doi:10.1371/journal.pntd.0010794)
Supplement: S1 Data — (XLSX) [file pntd.0010794.s001.xlsx]

## Sheet: Hoja1
key	ord	res_prev	fech_entr	casa	tipo_fam	nro_habitan	nro_habitac	abast_agua	almac_agua	febriles	rec_piriprox	fec_recibe	sabe_uso_piriprox	sshh	clasificacion	edad	sexo	migrante	pais_residencia	departamento_residencia	provincia_residencia	residencia	etnia	fecha_ini	hospitalizado	fecha_hos	aislamiento	fecha_ais	ventilacion	neumonia	fiebre	malestar	tos	garganta	congestion	respiratoria	diarrea	nauseas	cefalea	irritabilidad	muscular	abdominal	pecho	articulaciones	anosmia	ageusia	oido	otros_sintomas	temperatura
espr_0001	1	4	2020-02-11	592	1	5	3	0	1	0	NO		SI	0		34	1		Peru	TUMBES	TUMBES	TUMBES	Mestizo		NO						0	0	0	0	0	0	0	0	0	0	0	0	0	0	0	0	0	0	0
espr_0002	2	0	2020-02-11	592	1	5	3	0	1	0	NO		SI	0	0	26	0	NO	Peru	TUMBES	TUMBES	TUMBES	Mestizo		NO		NO				0	0	0	0	0	0	0	0	0	0	0	0	0	0	0	0	0	0	0
espr_0003	3	4	2020-02-11	592	1	5	3	0	1	0	NO		SI	0
espr_0004	4	4	2020-02-11	592	1	5	3	0	1	0	NO		SI	0
espr_0005	5	4	2020-02-11	592	1	5	3	0	1	0	NO		SI	0
espr_0006	6	0	2020-02-11	583	1	5	5	0	1	0	SI	10/15/2020	SI	0	0	60	0	NO	Peru	TUMBES	TUMBES	TUMBES	Mestizo		NO		NO				0	0	0	0	0	0	0	0	0	0	0	0	0	0	0	0	0	0	0
espr_0007	7	4	2020-02-11	583	1	5	5	0	1	0	SI	10/15/2020	SI	0
espr_0008	8	4	2020-02-11	583	1	5	5	0	1	0	SI	10/15/2020	SI	0
espr_0009	9	3	2020-02-11	583	1	5	5	0	1	0	SI	10/15/2020	SI	0	2	9	0	NO	Peru	TUMBES	TUMBES	TUMBES	Mestizo		NO		NO				0	0	0	0	0	0	0	0	0	0	0	0	0	0	0	0	0		0
espr_0010	10	4	2020-02-11	583	1	5	5	0	1	0	SI	10/15/2020	SI	0
espr_0011	11	4	2020-02-11	991	1	4	3	0	1	0	NO		SI	2
espr_0012	12	0	2020-02-11	991	1	4	3	0	1	0	NO		SI	2	1	27	0	NO	Peru	TUMBES	TUMBES	TUMBES	Mestizo	11/17/2020	NO		NO				0	0	0	1	0	0	0	0	0	0	0	0	0	0	0	0	0		0
espr_0013	13	4	2020-02-11	991	1	4	3	0	1	0	NO		SI	2
espr_0014	14	4	2020-02-11	991	1	4	3	0	1	0	NO		SI	2
espr_0015	15	0	2020-02-11	995	1	3	3	0	1	0	SI	10/23/2020	NO	2	1	42	1	NO	Peru	TUMBES	TUMBES	TUMBES	Mestizo	11/17/2020	NO		NO				0	0	0	0	0	0	0	0	0	0	0	0	0	0	0	0	0		0
espr_0016	16	0	2020-02-11	995	1	3	3	0	1	0	SI	10/23/2020	NO	2	0	36	1	NO	Peru	TUMBES	TUMBES	TUMBES	Mestizo		NO		NO				0	0	0	0	0	0	0	0	0	0	0	0	0	0	0	0	0		0
espr_0017	17	2	2020-02-11	995	1	3	3	0	1	0	SI	10/23/2020	NO	2	0	82	0	NO	Peru	TUMBES	TUMBES	TUMBES	Mestizo		NO		NO				0	1	1	1	1	0	0	0	1	0	1	0	1	1	0	0	0		1
espr_0018	18	0	2020-02-11	992	1	3	5	0	1	0	SI	10/28/2020	SI	0	0	72	1	NO	Peru	TUMBES	TUMBES	TUMBES	Mestizo		NO		NO				0	0	0	0	0	0	0	0	0	0	0	0	0	0	0	0	0		0
espr_0019	19	0	2020-02-11	992	1	3	5	0	1	0	SI	10/28/2020	SI	0	1	63	0	NO	Peru	TUMBES	TUMBES	TUMBES	Mestizo	11/17/2020	NO		NO				0	0	0	1	0	0	0	0	0	0	0	0	0	0	0	0	0		0
espr_0020	20	0	2020-02-11	992	1	3	5	0	1	0	SI	10/28/2020	SI	0	0	18	1	NO	Peru	TUMBES	TUMBES	TUMBES	Mestizo		NO		NO				0	0	0	0	0	0	0	0	0	0	0	0	0	0	0	0	0		0
espr_0021	21	4	2020-02-11	994	1	6	4	0	1	0	NO		SI	0
espr_0022	22	0	2020-02-11	994	1	6	4	0	1	0	NO		SI	0	1	41	0	NO	Peru	TUMBES	TUMBES	TUMBES	Mestizo	11/17/2020	NO		NO				0	0	0	1	0	0	0	0	0	0	0	0	0	0	0	0	0		0
espr_0023	23	4	2020-02-11	994	1	6	4	0	1	0	NO		SI	0
espr_0024	24	4	2020-02-11	994	1	6	4	0	1	0	NO		SI	0
espr_0025	25	4	2020-02-11	994	1	6	4	0	1	0	NO		SI	0
espr_0026	26	4	2020-02-11	994	1	6	4	0	1	0	NO		SI	0
espr_0027	27	0	2020-02-11	997	1	3	4	0	1	0	NO		SI	0	0	23	1	NO	Peru	TUMBES	TUMBES	TUMBES	Mestizo		NO		NO				0	0	0	0	0	0	0	0	0	0	0	0	0	0	0	0	0		0
espr_0028	28	0	2020-02-11	997	1	3	4	0	1	0	NO		SI	0	1	22	0	NO	Peru	TUMBES	TUMBES	TUMBES	Mestizo	11/17/2020	NO		NO				0	0	0	1	0	0	0	0	0	0	0	0	0	0	0	0	0		0
espr_0029	29	4	2020-02-11	997	1	3	4	0	1	0	NO		SI	0
espr_0030	30	0	2020-02-11	997	1	3	4	0	1	0	NO		SI	0	0	35	0	NO	Peru	TUMBES	TUMBES	TUMBES	Mestizo		NO		NO				0	0	0	0	0	0	0	0	0	0	0	0	0	0	0	0	0		0
espr_0031	31	0	2020-02-11	997	1	3	4	0	1	0	NO		SI	0	0	77	0	NO	Peru	TUMBES	TUMBES	TUMBES	Mestizo		NO		NO				0	0	0	0	0	0	0	0	0	0	0	0	0	0					0
espr_0032	32	4	2020-02-11	997	1	3	4	0	1	0	NO		SI	0
espr_0033	33	0	2020-02-11	836	1	4	5	0	1	0	SI	10/30/2020	SI	0	1	51	1	NO	Peru	TUMBES	ZARUMILLA	ZARUMILLA	Mestizo	2020-04-07	NO		NO				0	0	0	1	0	0	0	0	0	0	0	0	0	0	0	0	0		0
espr_0034	34	4	2020-02-11	836	1	4	5	0	1	0	SI	10/30/2020	SI	0
espr_0035	35	4	2020-02-11	836	1	4	5	0	1	0	SI	10/30/2020	SI	0
espr_0036	36	4	2020-02-11	836	1	4	5	0	1	0	SI	10/30/2020	SI	0
espr_0037	37	4	2020-02-11	886	1	5	4	0	1	0	SI	10/28/2020	SI	0
espr_0038	38	0	2020-02-11	886	1	5	4	0	1	0	SI	10/28/2020	SI	0	0	27	0	NO	Peru	TUMBES	TUMBES	TUMBES	Mestizo		NO		NO				0	0	0	0	0	0	0	0	0	0	0	0	0	0	0	0	0		0
espr_0039	39	3	2020-02-11	886	1	5	4	0	1	0	SI	10/28/2020	SI	0	0	11	0	NO	Peru	TUMBES	TUMBES	TUMBES	Mestizo		NO		NO				0	0	0	0	1	1	0	0	0	0	0	0	0	0	0	0	0		0
espr_0040	40	0	2020-02-11	886	1	5	4	0	1	0	SI	10/28/2020	SI	0	0	9	0	NO	Peru	TUMBES	TUMBES	TUMBES	Mestizo		NO		NO				0	0	0	0	0	0	0	0	0	0	0	0	0	0	0	0	0		0
espr_0041	41	4	2020-02-11	886	1	5	4	0	1	0	SI	10/28/2020	SI	0
espr_0042	42	4	2020-02-11	944	1	5	4	0	1	0	NO		SI	0
espr_0043	43	0	2020-02-11	944	1	5	4	0	1	0	NO		SI	0	0	15	1	NO	Peru	TUMBES	TUMBES	TUMBES	Mestizo		NO		NO				0	0	0	0	0	0	0	0	0	0	0	0	0	0	0	0	0		0
espr_0044	44	4	2020-02-11	944	1	5	4	0	1	0	NO		SI	0
espr_0045	45	0	2020-02-11	950	1	2	3	0	1	0	NO		SI	0	0	67	1	NO	Peru	TUMBES	TUMBES	TUMBES	Mestizo		NO		NO				0	0	0	0	0	0	0	0	0	0	0	0	0	0					0
espr_0046	46	3	2020-02-11	950	1	2	3	0	1	0	NO		SI	0	2	57	0	NO	Peru	TUMBES	TUMBES	TUMBES	Mestizo		NO		NO				0	0	0	0	0	0	0	0	0	0	0	0	0	0					0
espr_0047	47	3	2020-02-11	982	1	6	2	0	1	0	NO		NO	0	2	38	1	SI	Peru	TUMBES	TUMBES	TUMBES	Mestizo		NO		NO				0	0	0	0	0	0	0	0	0	0	0	0	0	0					0
espr_0048	48	3	2020-02-11	982	1	6	2	0	1	0	NO		NO	0	2	40	0	SI	Peru	TUMBES	TUMBES	TUMBES	Mestizo		NO		NO				0	0	0	0	0	0	0	0	0	0	0	0	0	0					0
espr_0049	49	4	2020-02-11	982	1	6	2	0	1	0	NO		NO	0
espr_0050	50	3	2020-02-11	982	1	6	2	0	1	0	NO		NO	0	2	12	1	SI	Peru	TUMBES	TUMBES	TUMBES	Mestizo		NO		NO				0	0	0	0	0	0	0	0	0	0	0	0	0	0					0
espr_0051	51	3	2020-02-11	982	1	6	2	0	1	0	NO		NO	0	2	9	1	SI	Peru	TUMBES	TUMBES	TUMBES	Mestizo		NO		NO				0	0	0	0	0	0	0	0	0	0	0	0	0	0					0
espr_0052	52	3	2020-02-11	982	1	6	2	0	1	0	NO		NO	0	2	3	0	SI	Peru	TUMBES	TUMBES	TUMBES	Mestizo		NO		NO				0	0	0	0	0	0	0	0	0	0	0	0	0	0					0
espr_0053	53	4	2020-02-11	958	2	6	4	0	1	0	SI	10/15/2020	SI	0
espr_0054	54	0	2020-02-11	958	2	6	4	0	1	0	SI	10/15/2020	SI	0	0	58	0	NO	Peru	TUMBES	TUMBES	TUMBES	Mestizo		NO		NO				0	0	0	0	0	0	0	0	0	0	0	0	0	0					0
espr_0055	55	4	2020-02-11	958	2	6	4	0	1	0	SI	10/15/2020	SI	0
espr_0056	56	0	2020-02-11	958	2	6	4	0	1	0	SI	10/15/2020	SI	0	0	32	0	NO	Peru	TUMBES	TUMBES	TUMBES	Mestizo		NO		NO				0	0	0	0	0	0	0	0	0	0	0	0	0	0					0
espr_0057	57	0	2020-02-11	958	2	6	4	0	1	0	SI	10/15/2020	SI	0	0	10	1	NO	Peru	TUMBES	TUMBES	TUMBES	Mestizo		NO		NO				0	0	0	0	0	0	0	0	0	0	0	0	0	0					0
espr_0058	58	0	2020-02-11	958	2	6	4	0	1	0	SI	10/15/2020	SI	0	0	5	0	NO	Peru	TUMBES	TUMBES	TUMBES	Mestizo		NO		NO				0	0	0	0	0	0	0	0	0	0	0	0	0	0					0
espr_0059	59	0	2020-02-11	784	1	3	4	0	1	0	SI	10/15/2020	SI	0	0	63	1	NO	Peru	TUMBES	TUMBES	TUMBES	Mestizo		NO		NO				0	0	0	0	0	0	0	0	0	0	0	0	0	0	0	0	0		0
espr_0060	60	3	2020-02-11	784	1	3	4	0	1	0	SI	10/15/2020	SI	0	2	51	0	NO	Peru	TUMBES	TUMBES	TUMBES	Mestizo		NO		NO				0	0	0	0	0	0	0	0	0	0	0	0	0	0	0	0	0		0
espr_0061	61	0	2020-02-11	784	1	3	4	0	1	0	SI	10/15/2020	SI	0	0	14	1	NO	Peru	TUMBES	TUMBES	TUMBES	Mestizo		NO		NO				0	0	0	0	0	0	0	0	0	0	0	0	0	0	0	0	0		0
espr_0062	62	4	2020-02-11	824	1	6	6	0	1	0	SI	10/17/2020	NO	0
espr_0063	63	4	2020-02-11	824	1	6	6	0	1	0	SI	10/17/2020	NO	0
espr_0064	64	4	2020-02-11	824	1	6	6	0	1	0	SI	10/17/2020	NO	0
espr_0065	65	4	2020-02-11	824	1	6	6	0	1	0	SI	10/17/2020	NO	0
espr_0066	66	4	2020-02-11	824	1	6	6	0	1	0	SI	10/17/2020	NO	0
espr_0067	67	4	2020-02-11	824	1	6	6	0	1	0	SI	10/17/2020	NO	0
espr_0068	68	4	2020-02-11	833	1	2	4	0	1	0	SI	10/17/2020	SI	0
espr_0069	69	3	2020-02-11	833	1	2	4	0	1	0	SI	10/17/2020	SI	0	2	46	0		Peru	TUMBES	TUMBES	TUMBES	Mestizo	11/19/2020	NO		NO				0	0	0	1	0	0	0	0	0	0	0	0	0	0	0	0	0		0
espr_0070	70	0	2020-02-11	906	1	1	8	0	1	0	SI	10/17/2020		0	0	24	1	NO	Peru	TUMBES	TUMBES	TUMBES	Mestizo		NO		NO				0	0	0	0	0	0	0	0	0	0	0	0	0	0	0	0	0		0
espr_0071	71	2	2020-02-11	942	1	5	5	0	1	0	SI	2020-10-05	NO	0	2	34	1		Peru	TUMBES	TUMBES	TUMBES	Mestizo	11/19/2020	NO		SI	11/19/2020			0	0	1	0	0	0	0	0	0	0	0	0	0	0	0	0	0		0
espr_0072	72	3	2020-02-11	942	1	5	5	0	1	0	SI	2020-10-05	NO	0	2	32	0	NO	Peru	TUMBES	TUMBES	TUMBES	Mestizo		NO		NO				0	0	0	0	0	0	0	0	0	0	0	0	0	0					0
espr_0073	73	3	2020-02-11	942	1	5	5	0	1	0	SI	2020-10-05	NO	0	2	14	0	NO	Peru	TUMBES	TUMBES	TUMBES	Mestizo		NO		NO				0	0	0	0	0	0	0	0	0	0	0	0	0	0					0
espr_0074	74	2	2020-02-11	942	1	5	5	0	1	0	SI	2020-10-05	NO	0	2	6	1	NO	Peru	TUMBES	TUMBES	TUMBES	Mestizo		NO		SI	11/19/2020			0	0	0	0	0	0	0	0	0	0	0	0	0	0					0
espr_0075	75	3	2020-02-11	942	1	5	5	0	1	0	SI	2020-10-05	NO	0	2	15	0	NO	Peru	TUMBES	TUMBES	TUMBES	Mestizo		NO		NO				0	0	0	0	0	0	0	0	0	0	0	0	0	0					0
espr_0076	76	0	2020-02-11	710	1	5	2	0	1	0	NO		NO	0	0	40	1	NO	Peru	TUMBES	TUMBES	TUMBES	Mestizo		NO		NO				0	0	0	0	0	0	0	0	0	0	0	0	0	0					0
espr_0077	77	0	2020-02-11	710	1	5	2	0	1	0	NO		NO	0	0	33	0	NO	Peru	TUMBES	TUMBES	TUMBES	Mestizo		NO		NO				0	0	0	0	0	0	0	0	0	0	0	0	0	0	0	0	0		0
espr_0078	78	0	2020-02-11	710	1	5	2	0	1	0	NO		NO	0	0	14	1	NO	Peru	TUMBES	TUMBES	TUMBES	Mestizo		NO		NO				0	0	0	0	0	0	0	0	0	0	0	0	0	0	0	0	0		0
espr_0079	79	0	2020-02-11	710	1	5	2	0	1	0	NO		NO	0	0	7	0	NO	Peru	TUMBES	TUMBES	TUMBES	Mestizo		NO		NO				0	0	0	0	0	0	0	0	0	0	0	0	0	0	0	0	0		0
espr_0080	80	0	2020-02-11	710	1	5	2	0	1	0	NO		NO	0	0	3	1	NO	Peru	TUMBES	TUMBES	TUMBES	Mestizo		NO		NO				0	0	0	0	0	0	0	0	0	0	0	0	0	0	0	0	0		0
espr_0081	81	0	2020-02-11	739	1	4	3	0	1	0	NO		NO	0	0	34	1	NO	Peru	TUMBES	TUMBES	TUMBES	Mestizo		NO		NO				0	0	0	0	0	0	0	0	0	0	0	0	0	0	0	0	0		0
espr_0082	82	0	2020-02-11	739	1	4	3	0	1	0	NO		NO	0	0	27	0	NO	Peru	TUMBES	TUMBES	TUMBES	Mestizo		NO		NO				0	0	0	0	0	0	0	0	0	0	0	0	0	0	0	0	0		0
espr_0083	83	0	2020-02-11	739	1	4	3	0	1	0	NO		NO	0	0	7	1	NO	Peru	TUMBES	TUMBES	TUMBES	Mestizo		NO		NO				0	0	0	0	0	0	0	0	0	0	0	0	0	0	0	0	0		0
espr_0084	84	4	2020-02-11	739	1	4	3	0	1	0	NO		NO	0
espr_0085	85	0	2020-02-11	968	1	5	2	0	1	0	NO		NO	2	0	34	1	NO	Peru	TUMBES	TUMBES	TUMBES	Mestizo		NO		NO				0	0	0	0	0	0	0	0	0	0	0	0	0	0					0
espr_0086	86	3	2020-02-11	968	1	5	2	0	1	0	NO		NO	2	2	34	0		Peru	TUMBES	TUMBES	TUMBES	Mestizo	11/19/2020	NO		NO				0	0	1	0	0	0	0	0	0	0	0	0	0	0	0	0	0		0
espr_0087	87	0	2020-02-11	968	1	5	2	0	1	0	NO		NO	2	0	14	1	NO	Peru	TUMBES	TUMBES	TUMBES	Mestizo		NO		NO				0	0	0	0	0	0	0	0	0	0	0	0	0	0					0
espr_0088	88	0	2020-02-11	968	1	5	2	0	1	0	NO		NO	2	0	9	1	NO	Peru	TUMBES	TUMBES	TUMBES	Mestizo		NO		NO				0	0	0	0	0	0	0	0	0	0	0	0	0	0					0
espr_0089	89	4	2020-02-11	968	1	5	2	0	1	0	NO		NO	2
espr_0090	90	0	2020-04-11	801	1	4	8	0	1	0	NO		SI	0	0	36	0	NO	Peru	TUMBES	TUMBES	TUMBES	Mestizo		NO		NO				0	0	0	0	0	0	0	0	0	0	0	0	0	0					0
espr_0091	91	0	2020-04-11	801	1	4	8	0	1	0	NO		SI	0	0	40	1	NO	Peru	TUMBES	TUMBES	TUMBES	Mestizo		NO		NO				0	0	0	0	0	0	0	0	0	0	0	0	0	0					0
espr_0092	92	0	2020-04-11	801	1	4	8	0	1	0	NO		SI	0	0	12	1	NO	Peru	TUMBES	TUMBES	TUMBES	Mestizo		NO		NO				0	0	0	0	0	0	0	0	0	0	0	0	0	0					0
espr_0093	93	0	2020-04-11	801	1	4	8	0	1	0	NO		SI	0	0	8	0	NO	Peru	TUMBES	TUMBES	TUMBES	Mestizo		NO		NO				0	0	0	0	0	0	0	0	0	0	0	0	0	0					0
espr_0094	94	3	2020-04-11	956	1	4	6	0	1	0	NO		SI	2	2	37	1	NO	Peru	TUMBES	TUMBES	TUMBES	Mestizo		NO		NO				0	0	0	0	0	0	0	0	0	0	0	0	0	0					0
espr_0095	95	3	2020-04-11	956	1	4	6	0	1	0	NO		SI	2	2	29	0		Peru	TUMBES	TUMBES	TUMBES	Mestizo	11/19/2020	NO		NO				0	0	1	0	0	0	0	0	0	0	0	0	0	0	0	0	0		0
espr_0096	96	0	2020-04-11	956	1	4	6	0	1	0	NO		SI	2	0	14	0	NO	Peru	TUMBES	TUMBES	TUMBES	Mestizo		NO		NO				0	0	0	0	0	0	0	0	0	0	0	0	0	0					0
espr_0097	97	0	2020-04-11	956	1	4	6	0	1	0	NO		SI	2	0	7	1	NO	Peru	TUMBES	TUMBES	TUMBES	Mestizo		NO		NO				0	0	0	0	0	0	0	0	0	0	0	0	0	0					0
espr_0098	98	0	2020-04-11	816	2	6	7	0	1	0	SI	10/15/2020	SI	0	0	55	1	NO	Peru	TUMBES	TUMBES	TUMBES	Mestizo		NO		NO				0	0	0	0	0	0	0	0	0	0	0	0	0	0					0
espr_0099	99	1	2020-04-11	816	2	6	7	0	1	0	SI	10/15/2020	SI	0	2	36	0	NO	Peru	TUMBES	TUMBES	TUMBES	Mestizo		NO		NO				0	0	0	0	0	0	0	0	0	0	0	0	0	0					0
espr_0099	100	0	2020-04-11	816	2	6	7	0	1	0	SI	10/15/2020	SI	0	0	50	0	NO	Peru	TUMBES	TUMBES	TUMBES	Mestizo		NO		NO				0	0	0	0	0	0	0	0	0	0	0	0	0	0	0	0	0		0
espr_0100	101	0	2020-04-11	816	2	6	7	0	1	0	SI	10/15/2020	SI	0	0	17	1	NO	Peru	TUMBES	TUMBES	TUMBES	Mestizo		NO		NO				0	0	0	0	0	0	0	0	0	0	0	0	0	0					0
espr_0101	102	0	2020-04-11	816	2	6	7	0	1	0	SI	10/15/2020	SI	0	0	9	1	NO	Peru	TUMBES	TUMBES	TUMBES	Mestizo		NO		NO				0	0	0	0	0	0	0	0	0	0	0	0	0	0					0
espr_0102	103	0	2020-04-11	816	2	6	7	0	1	0	SI	10/15/2020	SI	0	0	14	0	NO	Peru	TUMBES	TUMBES	TUMBES	Mestizo		NO		NO				0	0	0	0	0	0	0	0	0	0	0	0	0	0					0
espr_0103	104	0	2020-02-11	818	1	3	4	0	1	0	NO		SI	0	0	54	1	NO	Peru	TUMBES	TUMBES	TUMBES	Mestizo		NO		NO				0	0	0	0	0	0	0	0	0	0	0	0	0	0	0	0	0		0
espr_0104	105	4	2020-04-11	623	1	6	3	0	1	0	SI	10/25/2020	SI	0
espr_0105	106	0	2020-04-11	623	1	6	3	0	1	0	SI	10/25/2020	SI	0	0	37	0	NO	Peru	TUMBES	TUMBES	TUMBES	Mestizo		NO		NO				0	0	0	0	0	0	0	0	0	0	0	0	0	0	0	0	0		0
espr_0106	107	0	2020-04-11	623	1	6	3	0	1	0	SI	10/25/2020	SI	0	0	18	1	NO	Peru	TUMBES	TUMBES	TUMBES	Mestizo		NO		NO				0	0	0	0	0	0	0	0	0	0	0	0	0	0	0	0	0		0
espr_0107	108	0	2020-04-11	623	1	6	3	0	1	0	SI	10/25/2020	SI	0	0	14	1	NO	Peru	TUMBES	TUMBES	TUMBES	Mestizo		NO		NO				0	0	0	0	0	0	0	0	0	0	0	0	0	0	0	0	0		0
espr_0108	109	3	2020-04-11	623	1	6	3	0	1	0	SI	10/25/2020	SI	0	2	12	0	NO	Peru	TUMBES	TUMBES	TUMBES	Mestizo		NO		NO				0	0	0	0	0	0	0	0	0	0	0	0	0	0	0	0	0		0
espr_0109	110	0	2020-04-11	623	1	6	3	0	1	0	SI	10/25/2020	SI	0	0	6	0	NO	Peru	TUMBES	TUMBES	TUMBES	Mestizo		NO		NO				0	0	0	0	0	0	0	0	0	0	0	0	0	0	0	0	0		0
espr_0110	111	4	2020-04-11	623	1	6	3	0	1	0	SI	10/25/2020	SI	0
espr_0111	112	4	2020-04-11	726	1	4	4	0	1	0	SI	10/15/2020	SI	0
espr_0112	113	0	2020-04-11	726	1	4	4	0	1	0	SI	10/15/2020	SI	0	0	47	0	NO	Peru	TUMBES	TUMBES	TUMBES	Mestizo		NO		NO				0	0	0	0	0	0	0	0	0	0	0	0	0	0	0	0	0		0
espr_0113	114	3	2020-04-11	726	1	4	4	0	1	0	SI	10/15/2020	SI	0	2	13	0	NO	Peru	TUMBES	TUMBES	TUMBES	Mestizo		NO		NO				1	0	1	1	1	0	0	0	1	1	1	0	0	0	0	0	0		0
espr_0114	115	3	2020-04-11	726	1	4	4	0	1	0	SI	10/15/2020	SI	0	2	11	1	NO	Peru	TUMBES	TUMBES	TUMBES	Mestizo		NO		NO				1	0	1	1	1	0	0	0	0	1	1	0	0	0	0	0	0		0
espr_0115	116	2	2020-04-11	638	1	6	4	0	1	0	SI	10/23/2020	SI	0	2	54	1	NO	Peru	TUMBES	TUMBES	TUMBES	Mestizo		NO		NO				0	0	0	0	0	0	0	0	0	0	0	0	0	0					0
espr_0116	117	3	2020-04-11	638	1	6	4	0	1	0	SI	10/23/2020	SI	0	2	47	0	NO	Peru	TUMBES	TUMBES	TUMBES	Mestizo		NO		NO				0	0	0	0	0	0	0	0	0	0	0	0	0	0					0
espr_0117	118	0	2020-04-11	638	1	6	4	0	1	0	SI	10/23/2020	SI	0	2	29	1	NO	PERU	TUMBES	TUMBES	TUMBES	Mestizo		NO		NO				0	0	0	0	0	0	0	0	0	0	0	0	0	0					0
espr_0117	119	0	2020-04-11	638	1	6	4	0	1	0	SI	10/23/2020	SI	0	2	29	1	SI	Peru	TUMBES	TUMBES	TUMBES	Mestizo		NO		NO				0	0	0	0	0	0	0	0	0	0	0	0	0	0					0
espr_0118	120	1	2020-04-11	638	1	6	4	0	1	0	SI	10/23/2020	SI	0	2	27	0	NO	Peru	TUMBES	TUMBES	TUMBES	Mestizo		NO		NO				0	0	0	0	0	0	0	0	0	0	0	0	0	0					0
espr_0119	121	3	2020-04-11	638	1	6	4	0	1	0	SI	10/23/2020	SI	0	2	22	0	NO	Peru	TUMBES	TUMBES	TUMBES	Mestizo		NO		NO				0	0	0	0	0	0	0	0	0	0	0	0	0	0					0
espr_0120	122	3	2020-04-11	638	1	6	4	0	1	0	SI	10/23/2020	SI	0	2	6	1	NO	Peru	TUMBES	TUMBES	TUMBES	Mestizo		NO		NO				0	0	0	0	0	0	0	0	0	0	0	0	0	0					0
espr_0121	123	0	2020-04-11	781	1	1	5	0	1	0	SI	10/20/2020	SI	0	0	68	0	NO	Peru	TUMBES	TUMBES	TUMBES	Mestizo		NO		NO				0	0	0	0	0	0	0	0	0	0	0	0	0	0	0	0	0		0
espr_0122	124	4	2020-04-11	696	1	5	6	0	1	0	NO		NO	2
espr_0123	125	0	2020-04-11	696	1	5	6	0	1	0	NO		NO	2	2	24	0	NO	Peru	TUMBES	TUMBES	TUMBES	Mestizo		NO		NO				0	0	0	0	0	0	0	0	0	0	0	0	0	0					0
espr_0124	126	3	2020-04-11	696	1	5	6	0	1	0	NO		NO	2	2	4	0	NO	Peru	TUMBES	TUMBES	TUMBES	Mestizo		NO		NO				0	0	0	0	0	0	0	0	0	0	0	0	0	0					0
espr_0125	127	3	2020-04-11	696	1	5	6	0	1	0	NO		NO	2	2	17	0	NO	Peru	TUMBES	TUMBES	TUMBES	Mestizo		NO		NO				0	0	0	0	0	0	0	0	0	0	0	0	0	0					0
espr_0126	128	0	2020-04-11	696	1	5	6	0	1	0	NO		NO	2	0	14	0	NO	Peru	TUMBES	TUMBES	TUMBES	Mestizo		NO		NO				0	0	0	0	0	0	0	0	0	0	0	0	0	0					0
espr_0127	129	0	2020-04-11	939	1	3	4	0	1	0	NO		NO	3	2	21	1	NO	Peru	TUMBES	TUMBES	TUMBES	Mestizo		NO		NO				0	0	0	0	0	0	0	0	0	0	0	0	0	0					0
espr_0128	130	0	2020-04-11	939	1	3	4	0	1	0	NO		NO	3	0	16	0	NO	Peru	TUMBES	TUMBES	TUMBES	Mestizo		NO		NO				0	0	0	0	0	0	0	0	0	0	0	0	0	0					0
espr_0129	131	4	2020-04-11	939	1	3	4	0	1	0	NO		NO	3
espr_0130	132	0	2020-04-11	838	1	5	9	0	1	0	SI	10/15/2020	SI	0	0	55	1	NO	Peru	TUMBES	TUMBES	TUMBES	Mestizo		NO		NO				0	0	0	0	0	0	0	0	0	0	0	0	0	0					0
espr_0131	133	4	2020-04-11	838	1	5	9	0	1	0	SI	10/15/2020	SI	0
espr_0132	134	0	2020-04-11	838	1	5	9	0	1	0	SI	10/15/2020	SI	0	0	30	0	NO	Peru	TUMBES	TUMBES	TUMBES	Mestizo		NO		NO				0	0	0	0	0	0	0	0	0	0	0	0	0	0					0
espr_0133	135	4	2020-04-11	838	1	5	9	0	1	0	SI	10/15/2020	SI	0
espr_0134	136	4	2020-04-11	838	1	5	9	0	1	0	SI	10/15/2020	SI	0
espr_0135	137	0	2020-04-11	951	1	4	5	0	1	0	NO		SI	0	0	40	1	NO	Peru	TUMBES	TUMBES	TUMBES	Mestizo		NO		NO				0	0	0	0	0	0	0	0	0	0	0	0	0	0					0
espr_0136	138	0	2020-04-11	951	1	4	5	0	1	0	NO		SI	0	0	33	0	NO	Peru	TUMBES	TUMBES	TUMBES	Mestizo		NO		NO				0	0	0	0	0	0	0	0	0	0	0	0	0	0					0
espr_0137	139	3	2020-04-11	951	1	4	5	0	1	0	NO		SI	0	2	11	1	NO	Peru	TUMBES	TUMBES	TUMBES	Mestizo		NO		NO				0	0	0	0	0	0	0	0	0	0	0	0	0	0					0
espr_0138	140	3	2020-04-11	951	1	4	5	0	1	0	NO		SI	0	2	6	1	NO	Peru	TUMBES	TUMBES	TUMBES	Mestizo		NO		NO				0	0	0	0	0	0	0	0	0	0	0	0	0	0					0
espr_0139	141	4	2020-04-11	702	1	4	5	0	1	0	NO		SI	0
espr_0140	142	0	2020-04-11	702	1	4	5	0	1	0	NO		SI	0	0	38	0	NO	Peru	TUMBES	TUMBES	TUMBES	Mestizo		NO		NO				0	0	0	0	0	0	0	0	0	0	0	0	0	0					0
espr_0141	143	0	2020-04-11	702	1	4	5	0	1	0	NO		SI	0	0	19	0	NO	Peru	TUMBES	TUMBES	TUMBES	Mestizo		NO		NO				0	0	0	0	0	0	0	0	0	0	0	0	0	0	0	0	0		0
espr_0142	144	4	2020-04-11	702	1	4	5	0	1	0	NO		SI	0
espr_0143	145	3	2020-04-11	642	1	6	3	0	1	0	SI	10/20/2020	SI	0	2	50	1	NO	Peru	TUMBES	TUMBES	TUMBES	Mestizo		NO		NO				0	0	0	0	0	0	0	0	0	0	0	0	0	0					0
espr_0144	146	3	2020-04-11	642	1	6	3	0	1	0	SI	10/20/2020	SI	0	2	46	0	NO	Peru	TUMBES	TUMBES	TUMBES	Mestizo		NO		NO				0	0	0	0	0	0	0	0	0	0	0	0	0	0					0
espr_0145	147	3	2020-04-11	642	1	6	3	0	1	0	SI	10/20/2020	SI	0	2	29	0	NO	Peru	TUMBES	TUMBES	TUMBES	Mestizo		NO		NO				0	0	0	0	0	0	0	0	0	0	0	0	0	0					0
espr_0146	148	4	2020-04-11	642	1	6	3	0	1	0	SI	10/20/2020	SI	0
espr_0147	149	3	2020-04-11	642	1	6	3	0	1	0	SI	10/20/2020	SI	0	2	10	0	NO	Peru	TUMBES	TUMBES	TUMBES	Mestizo		NO		NO				0	0	0	0	0	0	0	0	0	0	0	0	0	0					0
espr_0148	150	3	2020-04-11	642	1	6	3	0	1	0	SI	10/20/2020	SI	0	2	8	0	NO	Peru	TUMBES	TUMBES	TUMBES	Mestizo		NO		NO				0	0	0	0	0	0	0	0	0	0	0	0	0	0					0
espr_0149	151	0	2020-03-11	607	1	3	3	0	1	0	SI	2020-10-01	NO	0	0	54	0	NO	Peru	TUMBES	TUMBES	TUMBES	Mestizo		NO		NO				0	0	0	0	0	0	0	0	0	0	0	0	0	0	0	0	0		0
espr_0150	152	4	2020-03-11	607	1	3	3	0	1	0	SI	2020-10-01	NO	0
espr_0151	153	0	2020-03-11	607	1	3	3	0	1	0	SI	2020-10-01	NO	0	0	21	1	NO	Peru	TUMBES	TUMBES	TUMBES	Mestizo		NO		NO				0	0	0	0	0	0	0	0	0	0	0	0	0	0	0	0	0		0
espr_0152	154	2	2020-03-11	573	1	5	6	0	1	0	SI	2020-10-01	SI	0	2	68	0	NO	Peru	TUMBES	TUMBES	TUMBES	Mestizo		NO		NO				0	0	0	0	0	0	0	0	0	0	0	0	0	0	0	0	0		0
espr_0153	155	0	2020-03-11	573	1	5	6	0	1	0	SI	2020-10-01	SI	0	0	37	0	NO	Peru	TUMBES	TUMBES	TUMBES	Mestizo		NO		NO				0	0	0	0	0	0	0	0	0	0	0	0	0	0	0	0	0	0	0
espr_0154	156	2	2020-03-11	573	1	5	6	0	1	0	SI	2020-10-01	SI	0	2	18	1	NO	Peru	TUMBES	TUMBES	TUMBES	Mestizo		NO		NO				0	0	0	0	0	0	0	0	0	0	0	0	0	0	0	0	0		0
espr_0155	157	0	2020-03-11	573	1	5	6	0	1	0	SI	2020-10-01	SI	0	0	14	0	NO	Peru	TUMBES	TUMBES	TUMBES	Mestizo		NO		NO				0	0	0	0	0	0	0	0	0	0	0	0	0	0	0	0	0	0	0
espr_0156	158	3	2020-03-11	573	1	5	6	0	1	0	SI	2020-10-01	SI	0	2	9	1	NO	Peru	TUMBES	TUMBES	TUMBES	Mestizo		NO		NO				0	0	0	0	0	0	0	0	0	0	0	0	0	0	0	0	0		0
espr_0157	159	1	2020-03-11	615	1	7	5	0	0	0	SI	2020-10-01	NO	0	2	51	1	NO	Peru	TUMBES	TUMBES	TUMBES	Mestizo		NO		SI	11/20/2020			0	1	0	1	0	0	0	0	1	0	1	0	0	1	0	0	0		0
espr_0158	160	0	2020-03-11	615	1	7	5	0	0	0	SI	2020-10-01	NO	0	0	48	0	NO	Peru	TUMBES	TUMBES	TUMBES	Mestizo		NO		NO				0	0	0	0	0	0	0	0	0	0	0	0	0	0	0	0	0		0
espr_0159	161	0	2020-03-11	615	1	7	5	0	0	0	SI	2020-10-01	NO	0	0	25	1	NO	Peru	TUMBES	TUMBES	TUMBES	Mestizo		NO		NO				0	0	0	0	0	0	0	0	0	0	0	0	0	0	0	0	0		0
espr_0160	162	3	2020-03-11	615	1	7	5	0	0	0	SI	2020-10-01	NO	0	2	14	1	NO	Peru	TUMBES	TUMBES	TUMBES	Mestizo		NO		NO				0	0	0	0	0	0	0	0	0	0	0	0	0	0	0	0	0		0
espr_0161	163	0	2020-03-11	615	1	7	5	0	0	0	SI	2020-10-01	NO	0	0	10	0	NO	Peru	TUMBES	TUMBES	TUMBES	Mestizo		NO		NO				0	0	0	0	0	0	0	0	0	0	0	0	0	0	0	0	0		0
espr_0162	164	0	2020-03-11	615	1	7	5	0	0	0	SI	2020-10-01	NO	0	0	24	0	NO	Peru	TUMBES	TUMBES	TUMBES	Mestizo		NO		NO				0	0	0	0	0	0	0	0	0	0	0	0	0	0	0	0	0		0
espr_0163	165	4	2020-03-11	615	1	7	5	0	0	0	SI	2020-10-01	NO	0
espr_0164	166	0	2020-03-11	761	1	11	6	0	1	0	SI	2010-10-01	SI	0	0	58	1	NO	Peru	TUMBES	TUMBES	TUMBES	Mestizo	8/13/2020	DESCONOCIDO		NO				0	1	0	1	0	0	0	0	0	0	0	0	0	0	0	0	0		0
espr_0165	167	0	2020-03-11	761	1	11	6	0	1	0	SI	2010-10-01	SI	0	0	45	0	NO	Peru	TUMBES	TUMBES	TUMBES	Mestizo	8/30/2020	NO		NO				1	0	1	1	0	0	0	0	0	0	0	0	0	0	0	0	0		0
espr_0166	168	4	2020-03-11	761	1	11	6	0	1	0	SI	2010-10-01	SI	0
espr_0167	169	0	2020-03-11	761	1	11	6	0	1	0	SI	2010-10-01	SI	0	0	27	0	NO	Peru	TUMBES	TUMBES	TUMBES		2020-10-06	NO		NO				1	0	1	1	1	1	1	0	1	0	0	0	0	0	0	0	0		0
espr_0168	170	0	2020-03-11	761	1	11	6	0	1	0	SI	2010-10-01	SI	0	1	17	0	NO	PERU	TUMBES	TUMBES	TUMBES	Mestizo	2020-09-07	NO		NO				0	0	1	1	1	1	0	0	1	0	0	0	0	0	0	0	0		37
espr_0169	171	0	2020-03-11	761	1	11	6	0	1	0	SI	2010-10-01	SI	0	1	79	0	NO	Peru	TUMBES	TUMBES	TUMBES	Mestizo	2020-11-08	NO		NO				0	0	0	1	1	0	0	0	0	0	0	0	0	0	0	0	0		0
espr_0170	172	3	2020-03-11	761	1	11	6	0	1	0	SI	2010-10-01	SI	0	2	23	0	NO	Peru	TUMBES	TUMBES	TUMBES	Mestizo		NO		NO				0	0	0	0	0	0	0	0	0	0	0	0	0	0	0	0	0		0
espr_0171	173	0	2020-03-11	761	1	11	6	0	1	0	SI	2010-10-01	SI	0	0	18	1	NO	Peru	TUMBES	TUMBES	TUMBES	Mestizo	7/15/2020	NO		NO				0	1	0	1	0	0	0	0	0	0	0	0	0	0	0	0	0		0
espr_0172	174	0	2020-03-11	761	1	11	6	0	1	0	SI	2010-10-01	SI	0	0	6	0	NO	Peru	TUMBES	TUMBES	TUMBES	Mestizo		NO		NO				0	0	0	0	0	0	0	0	0	0	0	0	0	0					0
espr_0173	175	0	2020-03-11	761	1	11	6	0	1	0	SI	2010-10-01	SI	0	0	4	0	NO	Peru	TUMBES	TUMBES	TUMBES	Mestizo		NO		NO				0	0	0	0	0	0	0	0	0	0	0	0	0	0					0
espr_0174	176	0	2020-03-11	761	1	11	6	0	1	0	SI	2010-10-01	SI	0	1	1	0	NO	Peru	TUMBES	TUMBES	TUMBES	Mestizo	2020-10-08	NO		NO				0	0	1	0	1	0	0	0	0	0	0	0	0	0	0	0	0	0	0
espr_0175	177	0	2020-03-11	611	1	1	5	0	1	0	SI	10/15/2020	SI	0	0	64	0	NO	Peru	TUMBES	TUMBES	TUMBES	Mestizo		NO		NO				0	0	0	0	0	0	0	0	0	0	0	0	0	0	0	0	0		0
espr_0176	178	2	2020-03-11	730	2	10	9	0	1	0	SI	10/15/2020	SI	0	2	59	1	NO	Peru	TUMBES	TUMBES	TUMBES	Mestizo		NO		NO				0	0	0	0	0	0	0	0	0	0	0	0	0	0	0	0	0		0
espr_0177	179	2	2020-03-11	730	2	10	9	0	1	0	SI	10/15/2020	SI	0	2	56	0	NO	Peru	TUMBES	TUMBES	TUMBES	Mestizo		NO		NO				0	0	0	0	0	0	0	0	0	0	0	0	0	0	0	0	0		0
espr_0178	180	0	2020-03-11	730	2	10	9	0	1	0	SI	10/15/2020	SI	0	0	37	1	NO	Peru	TUMBES	TUMBES	TUMBES	Mestizo		NO		NO				0	0	0	0	0	0	0	0	0	0	0	0	0	0	0	0	0		0
espr_0179	181	0	2020-03-11	730	2	10	9	0	1	0	SI	10/15/2020	SI	0	0	23	0	NO	Peru	TUMBES	TUMBES	TUMBES	Mestizo		NO		NO				0	0	0	0	0	0	0	0	0	0	0	0	0	0	0	0	0	0	0
espr_0180	182	0	2020-03-11	730	2	10	9	0	1	0	SI	10/15/2020	SI	0	0	26	0	NO	Peru	TUMBES	TUMBES	TUMBES	Mestizo		NO		NO				0	0	0	0	0	0	0	0	0	0	0	0	0	0	0	0	0	0	0
espr_0181	183	0	2020-03-11	730	2	10	9	0	1	0	SI	10/15/2020	SI	0	0	6	0	NO	Peru	TUMBES	TUMBES	TUMBES	Mestizo		NO		NO				0	0	0	0	0	0	0	0	0	0	0	0	0	0	0	0	0	0	0
espr_0182	184	0	2020-03-11	730	2	10	9	0	1	0	SI	10/15/2020	SI	0	0	16	1	NO	Peru	TUMBES	TUMBES	TUMBES	Mestizo		NO		NO				0	0	0	0	0	0	0	0	0	0	0	0	0	0	0	0	0	0	0
espr_0183	185	2	2020-03-11	730	2	10	9	0	1	0	SI	10/15/2020	SI	0	2	12	0	NO	Peru	TUMBES	TUMBES	TUMBES	Mestizo		NO		NO				0	0	0	0	0	0	0	0	0	0	0	0	0	0	0	0	0		0
espr_0184	186	0	2020-03-11	730	2	10	9	0	1	0	SI	10/15/2020	SI	0	0	8	1	NO	Peru	TUMBES	TUMBES	TUMBES	Mestizo		NO		NO				0	0	0	0	0	0	0	0	0	0	0	0	0	0	0	0	0	0	0
espr_0185	187	0	2020-03-11	730	2	10	9	0	1	0	SI	10/15/2020	SI	0	0	35	1	NO	Peru	TUMBES	TUMBES	TUMBES	Mestizo		NO		NO				0	0	0	0	0	0	0	0	0	0	0	0	0	0	0	0	0	0	0
espr_0186	188	0	2020-03-11	632	1	3	4	0	1	0	SI	10/15/2020	SI	0	0	61	0	NO	Peru	TUMBES	TUMBES	TUMBES	Mestizo		NO		NO				0	0	0	0	0	0	0	0	0	0	0	0	0	0	0	0	0		0
espr_0187	189	0	2020-03-11	632	1	1	7	0	1	0	SI	10/15/2020	NO	0	0	35	1	NO	Peru	TUMBES	TUMBES	TUMBES	Mestizo		NO		NO				0	0	0	0	0	0	0	0	0	0	0	0	0	0	0	0	0		0
espr_0188	190	0	2020-03-11	632	1	1	7	0	1	0	SI	10/15/2020	NO	0	0	29	0	NO	Peru	TUMBES	TUMBES	TUMBES	Mestizo		NO		NO				0	0	0	0	0	0	0	0	0	0	0	0	0	0	0	0	0		0
espr_0189	191	4	2020-03-11	632	1	1	7	0	1	0	SI	10/15/2020	NO	0
espr_0190	192	0	2020-03-11	962	1	5	3	0	1	0	SI	2020-10-01	NO	0	0	38	1	NO	Peru	TUMBES	TUMBES	TUMBES	Mestizo		NO		NO				0	0	0	0	0	0	0	0	0	0	0	0	0	0					0
espr_0191	193	0	2020-03-11	962	1	5	3	0	1	0	SI	2020-10-01	NO	0	0	42	0	SI	Peru	TUMBES	TUMBES	TUMBES	Mestizo		NO		NO				0	0	0	0	0	0	0	0	0	0	0	0	0	0					0
espr_0192	194	0	2020-03-11	962	1	5	3	0	1	0	SI	2020-10-01	NO	0	0	13	1	NO	Peru	TUMBES	TUMBES	TUMBES	Mestizo		NO		NO				0	0	0	0	0	0	0	0	0	0	0	0	0	0					0
espr_0193	195	0	2020-03-11	962	1	5	3	0	1	0	SI	2020-10-01	NO	0	0	9	1	NO	Peru	TUMBES	TUMBES	TUMBES	Mestizo		NO		NO				0	0	0	0	0	0	0	0	0	0	0	0	0	0					0
espr_0194	196	0	2020-03-11	962	1	5	3	0	1	0	SI	2020-10-01	NO	0	0	8	1	NO	Peru	TUMBES	TUMBES	TUMBES	Mestizo		NO		NO				0	0	0	0	0	0	0	0	0	0	0	0	0	0					0
espr_0195	197	0	2020-03-11	580	1	4	3	0	1	0	NO		NO	0	0	44	0	NO	Peru	TUMBES	TUMBES	TUMBES	Mestizo		NO		NO				0	0	0	0	0	0	0	0	0	0	0	0	0	0	0	0	0		0
espr_0196	198	0	2020-03-11	580	1	4	3	0	1	0	NO		NO	0	0	14	1	NO	Peru	TUMBES	TUMBES	TUMBES	Mestizo		NO		NO				0	0	0	0	0	0	0	0	0	0	0	0	0	0	0	0	0		0
espr_0197	199	0	2020-03-11	580	1	4	3	0	1	0	NO		NO	0	0	12	0	NO	Peru	TUMBES	TUMBES	TUMBES	Mestizo		NO		NO				0	0	0	0	0	0	0	0	0	0	0	0	0	0	0	0	0		0
espr_0198	200	4	2020-03-11	580	1	4	3	0	1	0	NO		NO	0
espr_0199	201	4	2020-06-11	634	1	6	3	0	1	0	NO		NO	0
espr_0200	202	4	2020-06-11	634	1	6	3	0	1	0	NO		NO	0
espr_0201	203	0	2020-06-11	634	1	6	3	0	1	0	NO		NO	0	1	15	0	NO	Peru	TUMBES	TUMBES	TUMBES	Mestizo	11/17/2020	NO		NO				0	0	0	0	0	0	0	0	0	0	0	0	0	0	0	0	0		0
espr_0202	204	0	2020-06-11	634	1	6	3	0	1	0	NO		NO	0	0	9	0	NO	Peru	TUMBES	TUMBES	TUMBES	Mestizo		NO		NO				0	0	0	0	0	0	0	0	0	0	0	0	0	0	0	0	0		0
espr_0203	205	0	2020-06-11	634	1	6	3	0	1	0	NO		NO	0	0	5	0	NO	Peru	TUMBES	TUMBES	TUMBES	Mestizo		NO		NO				0	0	0	0	0	0	0	0	0	0	0	0	0	0	0	0	0		0
espr_0204	206	3	2020-06-11	634	1	6	3	0	1	0	NO		NO	0	0	73	0	NO	Peru	TUMBES	TUMBES	TUMBES	Mestizo		NO		NO				0	0	1	0	0	0	0	0	1	0	0	0	0	0	0	0	0		0
espr_0205	207	0	2020-06-11	698	1	2	3	0	1	0	SI	10/15/2020	NO	0	0	55	1	NO	Peru	TUMBES	TUMBES	TUMBES	Mestizo		NO		NO				0	0	0	0	0	0	0	0	0	0	0	0	0	0					0
espr_0206	208	0	2020-06-11	698	1	2	3	0	1	0	SI	10/15/2020	NO	0	0	68	0	NO	Peru	TUMBES	TUMBES	TUMBES	Mestizo		NO		NO				0	0	0	0	0	0	0	0	0	0	0	0	0	0					0
espr_0207	209	0	2020-06-11	924	1	3	3	0	1	0	SI	10/15/2020	NO	3	0	44	1	NO	Peru	TUMBES	TUMBES	TUMBES	Mestizo		NO		NO				0	0	0	0	0	0	0	0	0	0	0	0	0	0	0	0	0		0
espr_0208	210	0	2020-06-11	924	1	3	3	0	1	0	SI	10/15/2020	NO	3	0	34	0	NO	Peru	TUMBES	TUMBES	TUMBES	Mestizo	2020-05-07	NO		NO				1	0	1	1	0	0	0	0	1	0	0	0	0	0	0	0	0		0
espr_0209	211	4	2020-06-11	924	1	3	3	0	1	0	SI	10/15/2020	NO	3
espr_0210	212	2	2020-06-11	675	1	1	3	0	1	0	NO		SI	2	2	63	1	NO	Peru	TUMBES	TUMBES	TUMBES	Mestizo		NO		SI	11/21/2020			0	0	0	0	0	0	0	0	0	0	0	0	0	0					0
espr_0211	213	0	2020-06-11	887	1	2	4	0	1	0	SI	2020-10-01	SI	0	0	25	0	NO	Peru	TUMBES	TUMBES	TUMBES	Mestizo		NO		NO				0	0	0	0	0	0	0	0	0	0	0	0	0	0					0
espr_0212	214	3	2020-06-11	887	1	2	4	0	1	0	SI	2020-10-01	SI	0	2	5	1
espr_0213	215	0	10/29/2020	610	1	6	5	0	1	0	NO		SI	0	0	59	1	NO	Peru	TUMBES	TUMBES	TUMBES	Mestizo		NO		NO				1	0	0	0	0	0	0	0	0	0	0	0	0	0	0	0	0		0
espr_0214	216	0	10/29/2020	610	1	6	5	0	1	0	NO		SI	0	0	58	0	NO	Peru	TUMBES	TUMBES	TUMBES	Mestizo		NO		NO				0	0	0	0	0	0	0	0	0	0	0	0	0	0	0	0	0		0
espr_0215	217	4	10/29/2020	610	1	6	5	0	1	0	NO		SI	0
espr_0216	218	0	10/29/2020	610	1	6	5	0	1	0	NO		SI	0	0	37	0	NO	Peru	TUMBES	TUMBES	TUMBES	Mestizo		NO		NO				0	0	0	0	0	0	0	0	0	0	0	0	0	0	0	0	0		0
espr_0217	219	0	10/29/2020	610	1	6	5	0	1	0	NO		SI	0	0	16	0	NO	Peru	TUMBES	TUMBES	TUMBES	Mestizo		NO		NO				0	0	0	0	0	0	0	0	0	0	0	0	0	0	0	0	0		0
espr_0218	220	0	10/29/2020	610	1	6	5	0	1	0	NO		SI	0	0	8	1	NO	Peru	TUMBES	TUMBES	TUMBES	Mestizo		NO		NO				0	0	0	0	0	0	0	0	0	0	0	0	0	0	0	0	0		0
espr_0219	221	0	10/29/2020	741	1	5	4	0	1	0	SI	10/20/2020	SI	0	0	42	1	NO	Peru	TUMBES	TUMBES	TUMBES	Mestizo		NO		NO				0	0	1	0	0	0	0	0	1	0	0	0	0	0	0	0	0		0
espr_0220	222	0	10/29/2020	741	1	5	4	0	1	0	SI	10/20/2020	SI	0	0	39	0	NO	Peru	TUMBES	TUMBES	TUMBES	Mestizo		NO		NO				0	0	0	0	0	0	0	0	0	0	0	0	0	0	0	0	0		0
espr_0221	223	0	10/29/2020	741	1	5	4	0	1	0	SI	10/20/2020	SI	0	0	16	1	NO	Peru	TUMBES	TUMBES	TUMBES	Mestizo		NO		NO				0	0	0	0	0	0	0	0	0	0	0	0	0	0	0	0	0		0
espr_0222	224	0	10/29/2020	741	1	5	4	0	1	0	SI	10/20/2020	SI	0	0	10	1	NO	Peru	TUMBES	TUMBES	TUMBES	Mestizo		NO		NO				0	0	0	0	1	0	0	0	0	0	0	0	0	0	0	0	0		0
espr_0223	225	0	10/29/2020	741	1	5	4	0	1	0	SI	10/20/2020	SI	0	0	7	0	NO	Peru	TUMBES	TUMBES	TUMBES	Mestizo		NO		NO				0	0	1	0	0	0	0	0	0	0	0	0	0	0	0	0	0		0
espr_0224	226	0	10/29/2020	744	1	3	4	0	1	0	NO		SI	0	0	62	0	NO	Peru	TUMBES	TUMBES	TUMBES	Mestizo		NO		NO				0	0	0	0	0	0	0	0	0	0	0	0	0	0	0	0	0		0
espr_0225	227	4	10/29/2020	744	1	3	4	0	1	0	NO		SI	0
espr_0226	228	0	10/29/2020	744	1	3	4	0	1	0	NO		SI	0	0	25	0	NO	Peru	TUMBES	TUMBES	TUMBES	Mestizo		NO		NO				0	0	0	0	0	0	0	0	0	0	0	0	0	0	0	0	0		0
espr_0227	229	4	10/29/2020	744	1	3	4	0	1	0	NO		SI	0
espr_0228	230	0	10/30/2020	593	1	2	3	0	1	0	SI	10/20/2020	SI	0	0	86	0	NO	Peru	TUMBES	TUMBES	TUMBES	Mestizo		NO		NO				0	0	0	0	0	0	0	0	0	0	0	0	0	0	0	0	0		0
espr_0229	231	4	10/30/2020	593	1	2	3	0	1	0	SI	10/20/2020	SI	0
espr_0230	232	0	10/30/2020	606	1	4	5	0	1	0	SI	10/20/2020	SI	0	0	36	0	NO	Peru	TUMBES	TUMBES	TUMBES	Mestizo		NO		NO				0	0	0	0	0	0	0	0	0	0	0	0	0	0	0	0	0		0
espr_0231	233	0	10/30/2020	606	1	4	5	0	1	0	SI	10/20/2020	SI	0	0	20	1	NO	Peru	TUMBES	TUMBES	TUMBES	Mestizo	2020-10-08	NO		NO				1	0	0	0	0	0	0	0	1	1	0	0	0	0	0	0	0		37
espr_0232	234	0	10/30/2020	606	1	4	5	0	1	0	SI	10/20/2020	SI	0	0	12	1	NO	Peru	TUMBES	TUMBES	TUMBES	Mestizo		NO		NO				0	0	0	0	0	0	0	0	0	0	0	0	0	0	0	0	0		0
espr_0233	235	0	10/30/2020	606	1	4	5	0	1	0	SI	10/20/2020	SI	0	0	4	0	NO	Peru	TUMBES	TUMBES	TUMBES	Mestizo		NO		NO				0	0	0	0	0	0	0	0	0	0	0	0	0	0	0	0	0		0
espr_0234	236	0	10/31/2020	803	1	4	5	0	1	0	SI	10/15/2020	NO	0	0	50	1	NO	Peru	TUMBES	TUMBES	TUMBES	Mestizo		NO		NO				0	0	0	0	0	0	0	0	0	0	0	0	0	0					0
espr_0235	237	3	10/31/2020	803	1	4	5	0	1	0	SI	10/15/2020	NO	0	2	46	0	NO	Peru	TUMBES	TUMBES	TUMBES	Mestizo		NO		NO				0	0	0	0	0	0	0	0	0	0	0	0	0	0					0
espr_0236	238	3	10/31/2020	803	1	4	5	0	1	0	SI	10/15/2020	NO	0	2	16	1	NO	Peru	TUMBES	TUMBES	TUMBES	Mestizo		NO		NO				0	0	0	0	0	0	0	0	0	0	0	0	0	0					0
espr_0237	239	3	10/31/2020	803	1	4	5	0	1	0	SI	10/15/2020	NO	0	2	14	1	NO	Peru	TUMBES	TUMBES	TUMBES	Mestizo		NO		NO				0	0	0	0	0	0	0	0	0	0	0	0	0	0					0
espr_0238	240	0	10/31/2020	916	1	4	4	0	1	0	SI	10/15/2020	NO	0	0	53	1	NO	Peru	TUMBES	TUMBES	TUMBES	Mestizo		NO		NO				0	0	0	0	0	0	0	0	0	0	0	0	0	0	0	0	0		0
espr_0239	241	0	10/31/2020	916	1	4	4	0	1	0	SI	10/15/2020	NO	0	0	42	0	NO	Peru	TUMBES	TUMBES	TUMBES	Mestizo		NO		NO				0	0	0	0	0	0	0	0	0	0	0	0	0	0	0	0	0		0
espr_0240	242	0	10/31/2020	916	1	4	4	0	1	0	SI	10/15/2020	NO	0	0	18	0	NO	Peru	TUMBES	TUMBES	TUMBES	Mestizo		NO		NO				0	0	0	0	0	0	0	0	0	0	0	0	0	0	0	0	0		0
espr_0241	243	0	10/31/2020	916	1	4	4	0	1	0	SI	10/15/2020	NO	0	0	9	1	NO	Peru	TUMBES	TUMBES	TUMBES	Mestizo		NO		NO				0	0	0	0	0	0	0	0	0	0	0	0	0	0	0	0	0		0
espr_0242	244	0	10/31/2020	917	1	3	5	0	1	0	SI	10/15/2020	NO	0	0	39	1	NO	Peru	TUMBES	TUMBES	TUMBES	Mestizo		NO		NO				0	0	0	0	1	0	0	0	0	0	0	0	0	0	0	0	0		0
espr_0243	245	0	10/31/2020	917	1	3	5	0	1	0	SI	10/15/2020	NO	0	0	39	0	NO	Peru	TUMBES	TUMBES	TUMBES	Mestizo		NO		NO				0	0	0	1	0	0	0	0	0	0	0	0	0	0	0	0	0		0
espr_0244	246	0	10/31/2020	917	1	3	5	0	1	0	SI	10/15/2020	NO	0	0	6	1	NO	Peru	TUMBES	TUMBES	TUMBES	Mestizo		NO		NO				0	0	0	0	0	0	0	0	0	0	0	0	0	0	0	0	0		0
espr_0245	247	0	10/31/2020	922	1	1	1	0	1	0	SI	10/15/2020	NO	0	0	66	0	NO	Peru	TUMBES	TUMBES	TUMBES	Mestizo		NO		NO				0	0	0	0	0	0	0	0	0	0	0	0	0	0					0
espr_0246	248	4	10/31/2020	889	1	5	6	0	1	0	SI	10/23/2020	NO	0
espr_0247	249	0	10/31/2020	889	1	5	6	0	1	0	SI	10/23/2020	NO	0	0	38	0	NO	Peru	TUMBES	TUMBES	TUMBES	Mestizo		NO		NO				0	1	0	1	0	0	0	0	0	0	0	0	0	0	0	0	0		0
espr_0248	250	0	10/31/2020	889	1	5	6	0	1	0	SI	10/23/2020	NO	0	0	16	1	NO	Peru	TUMBES	TUMBES	TUMBES	Mestizo		NO		NO				0	0	0	0	0	0	0	0	0	0	0	0	0	0	0	0	0		0
espr_0249	251	0	10/31/2020	889	1	5	6	0	1	0	SI	10/23/2020	NO	0	0	12	1	NO	Peru	TUMBES	TUMBES	TUMBES	Mestizo		NO		NO				0	0	0	0	0	0	0	0	0	0	0	0	0	0	0	0	0		0
espr_0250	252	0	10/31/2020	889	1	5	6	0	1	0	SI	10/23/2020	NO	0	0	5	1	NO	Peru	TUMBES	TUMBES	TUMBES	Mestizo		NO		NO				0	0	0	0	0	0	0	0	0	0	0	0	0	0	0	0	0		0
espr_0251	253	0	10/31/2020	705	1	4	4	0	1	0	NO		NO	0	0	33	1	NO	Peru	TUMBES	TUMBES	TUMBES	Mestizo		NO		NO				0	0	0	0	0	0	0	0	0	0	0	0	0	0					0
espr_0252	254	0	10/31/2020	705	1	4	4	0	1	0	NO		NO	0	0	34	0	NO	Peru	TUMBES	TUMBES	TUMBES	Mestizo		NO		NO				0	0	1	0	0	0	0	0	0	0	0	0	0	0	0	0	0		0
espr_0253	255	0	10/31/2020	705	1	4	4	0	1	0	NO		NO	0	0	12	1	NO	Peru	TUMBES	TUMBES	TUMBES	Mestizo		NO		NO				0	0	0	0	0	0	0	0	0	0	0	0	0	0					0
espr_0254	256	0	10/31/2020	705	1	4	4	0	1	0	NO		NO	0	0	3	1	NO	Peru	TUMBES	TUMBES	TUMBES	Mestizo		NO		NO				0	0	0	0	0	0	0	0	0	0	0	0	0	0					0
espr_0255	257	4	10/31/2020	643	1	3	5	0	1	0	SI	10/23/2020	NO	0
espr_0256	258	3	10/31/2020	643	1	3	5	0	1	0	SI	10/23/2020	NO	0	0	27	0	NO	Peru	TUMBES	TUMBES	TUMBES	Mestizo		NO		NO				0	0	0	0	0	0	0	0	0	0	0	0	0	0	0	0	0		0
espr_0257	259	3	10/31/2020	643	1	3	5	0	1	0	SI	10/23/2020	NO	0	1	10	1		Peru	TUMBES	TUMBES	TUMBES	Mestizo	11/17/2020	NO		NO				0	0	0	1	0	0	0	0	0	0	0	0	0	0	0	0	0		0
espr_0258	260	0	10/31/2020	616	1	5	4	0	1	0	SI	10/23/2020	NO	0	0	45	1	NO	Peru	TUMBES	TUMBES	TUMBES	Mestizo		NO		NO				0	0	0	0	0	0	0	0	0	0	0	0	0	0	0	0	0		0
espr_0259	261	0	10/31/2020	616	1	5	4	0	1	0	SI	10/23/2020	NO	0	0	38	0	NO	Peru	TUMBES	TUMBES	TUMBES	Mestizo		NO		NO				0	0	0	1	0	0	0	0	0	0	0	0	0	0	0	0	0		0
espr_0260	262	0	10/31/2020	616	1	5	4	0	1	0	SI	10/23/2020	NO	0	0	21	1	NO	Peru	TUMBES	TUMBES	TUMBES	Mestizo		NO		NO				0	0	0	0	0	0	0	0	0	0	0	0	0	0	0	0	0		0
espr_0261	263	0	10/31/2020	616	1	5	4	0	1	0	SI	10/23/2020	NO	0	0	8	1	NO	PERU	TUMBES	TUMBES	TUMBES	Mestizo	2020-08-10	NO		NO				0	1	0	1	0	0	0	0	0	0	1	0	0	0	0	0	0		0
espr_0262	264	4	10/31/2020	616	1	5	4	0	1	0	SI	10/23/2020	NO	0
espr_0263	265	3	10/30/2020	585	1	3	2	0	1	0	SI	10/15/2020	NO	0	2	65	0		Peru	TUMBES	TUMBES	TUMBES	Mestizo	2020-02-10	NO		NO				1	1	1	1	0	0	0	0	1	0	0	0	0	0	0	0	0		0
espr_0264	266	0	10/30/2020	585	1	3	2	0	1	0	SI	10/15/2020	NO	0	0	69	0	NO	Peru	TUMBES	TUMBES	TUMBES	Mestizo		NO		NO				0	0	0	0	1	0	0	0	0	0	0	0	0	0	0	0	0		0
espr_0265	267	0	10/30/2020	585	1	3	2	0	1	0	SI	10/15/2020	NO	0	0	38	1	NO	Peru	TUMBES	TUMBES	TUMBES	Mestizo		NO		NO				0	0	0	0	0	0	0	0	0	0	0	0	0	0	0	0	0		0
espr_0266	268	0	10/30/2020	779	1	7	6	0	1	0	SI	10/15/2020	NO	0	2	87	0	NO	Peru	TUMBES	TUMBES	TUMBES	Mestizo		NO		NO				0	0	0	0	0	0	0	0	0	0	0	0	0	0	0	0	0		0
espr_0267	269	4	10/30/2020	779	1	7	6	0	1	0	SI	10/15/2020	NO	0
espr_0268	270	0	10/30/2020	779	1	7	6	0	1	0	SI	10/15/2020	NO	0	2	42	1	NO	Peru	TUMBES	TUMBES	TUMBES	Mestizo		NO		NO				0	0	0	0	0	0	0	0	0	0	0	0	0	0	0	0	0		0
espr_0269	271	3	10/30/2020	779	1	7	6	0	1	0	SI	10/15/2020	NO	0	2	31	0	NO	Peru	TUMBES	TUMBES	TUMBES	Mestizo		NO		NO				0	0	0	0	0	0	0	0	0	0	0	0	0	0	0	0	0		0
espr_0270	272	4	10/30/2020	779	1	7	6	0	1	0	SI	10/15/2020	NO	0
espr_0271	273	0	10/30/2020	779	1	7	6	0	1	0	SI	10/15/2020	NO	0	0	6	1	NO	Peru	TUMBES	TUMBES	TUMBES	Mestizo		NO		NO				0	0	0	0	0	0	0	0	0	0	0	0	0	0	0	0	0		0
espr_0272	274	0	10/30/2020	779	1	7	6	0	1	0	SI	10/15/2020	NO	0	0	2	1	NO	Peru	TUMBES	TUMBES	TUMBES	Mestizo		NO		NO				0	0	0	0	0	0	0	0	0	0	0	0	0	0	0	0	0		0
espr_0273	275	4	10/30/2020	778	1	11	6	0	1	0	SI	10/15/2020	NO	0
espr_0274	276	0	10/30/2020	778	1	11	6	0	1	0	SI	10/15/2020	NO	0	0	26	0	NO	Peru	TUMBES	TUMBES	TUMBES	Mestizo		NO		NO				0	0	1	0	0	0	0	0	0	0	0	0	0	0	0	0	0		0
espr_0275	277	0	10/30/2020	778	1	11	6	0	1	0	SI	10/15/2020	NO	0	0	4	0	NO	Peru	TUMBES	TUMBES	TUMBES	Mestizo		NO		NO				0	0	0	0	0	0	0	0	0	0	0	0	0	0	0	0	0		0
espr_0276	278	0	10/30/2020	778	1	11	6	0	1	0	SI	10/15/2020	NO	0	2	28	0	NO	Peru	TUMBES	TUMBES	TUMBES	Mestizo		NO		NO				0	0	1	1	0	0	0	0	0	0	0	0	0	0	0	0	0		0
espr_0277	279	0	10/30/2020	778	1	11	6	0	1	0	SI	10/15/2020	NO	0	0	6	0	NO	Peru	TUMBES	TUMBES	TUMBES	Mestizo		NO		NO				0	0	0	0	0	0	0	0	0	0	0	0	0	0	0	0	0		0
espr_0278	280	4	10/30/2020	778	1	11	6	0	1	0	SI	10/15/2020	NO	0
espr_0279	281	4	10/30/2020	778	1	11	6	0	1	0	SI	10/15/2020	NO	0
espr_0280	282	0	10/30/2020	778	1	11	6	0	1	0	SI	10/15/2020	NO	0	0	26	0	NO	Peru	TUMBES	TUMBES	TUMBES	Mestizo		NO		NO				0	0	0	0	0	0	0	0	0	0	0	0	0	0	0	0	0		0
espr_0281	283	0	10/30/2020	778	1	11	6	0	1	0	SI	10/15/2020	NO	0	0	6	1	NO	Peru	TUMBES	TUMBES	TUMBES	Mestizo		NO		NO				0	0	0	0	0	0	0	0	0	0	0	0	0	0	0	0	0		0
espr_0282	284	0	10/30/2020	778	1	11	6	0	1	0	SI	10/15/2020	NO	0	0	21	0	NO	Peru	TUMBES	TUMBES	TUMBES	Mestizo		NO		NO				0	0	0	1	0	0	0	0	0	0	0	0	0	0	0	0	0		0
espr_0283	285	0	10/30/2020	778	1	11	6	0	1	0	SI	10/15/2020	NO	0	0	4	0	NO	Peru	TUMBES	TUMBES	TUMBES	Mestizo		NO		NO				0	0	0	0	0	0	0	0	0	0	0	0	0	0	0	0	0		0
espr_0284	286	4	10/30/2020	777	1	8	8	0	1	0	SI	10/15/2020	NO	0
espr_0285	287	0	10/30/2020	777	1	8	8	0	1	0	SI	10/15/2020	NO	0	0	72	0	NO	Peru	TUMBES	TUMBES	TUMBES	Mestizo		NO		NO				0	0	0	0	0	0	0	0	0	0	0	0	0	0	0	0	0		0
espr_0286	288	3	10/30/2020	777	1	8	8	0	1	0	SI	10/15/2020	NO	0	2	50	1	NO	Peru	TUMBES	TUMBES	TUMBES	Mestizo		NO		NO				0	0	1	1	1	0	0	0	0	0	0	0	0	0	0	0	0		0
espr_0287	289	4	10/30/2020	777	1	8	8	0	1	0	SI	10/15/2020	NO	0
espr_0288	290	4	10/30/2020	777	1	8	8	0	1	0	SI	10/15/2020	NO	0
espr_0289	291	0	10/30/2020	777	1	8	8	0	1	0	SI	10/15/2020	NO	0	0	20	0	NO	Peru	TUMBES	TUMBES	TUMBES	Mestizo		NO		NO				0	0	0	1	1	0	0	0	0	0	0	0	0	0	0	0	0		0
espr_0290	292	4	10/30/2020	777	1	8	8	0	1	0	SI	10/15/2020	NO	0
espr_0291	293	3	10/30/2020	777	1	8	8	0	1	0	SI	10/15/2020	NO	0	2	43	0	NO	Peru	TUMBES	TUMBES	TUMBES	Mestizo		NO		NO				0	1	1	0	1	0	0	0	0	0	0	0	0	0	0	0	0		0
espr_0292	294	3	10/30/2020	768	1	3	5	0	1	0	NO		NO	0	2	57	1	NO	Peru	TUMBES	TUMBES	TUMBES	Mestizo		NO		NO				0	0	0	0	0	0	0	0	0	0	0	0	0	0	0	0	0		0
espr_0293	295	3	10/30/2020	768	1	3	5	0	1	0	NO		NO	0	2	46	0	NO	Peru	TUMBES	TUMBES	TUMBES	Mestizo		NO		NO				0	0	0	0	0	0	0	0	0	0	0	0	0	0	0	0	0		0
espr_0294	296	3	10/30/2020	768	1	3	5	0	1	0	NO		NO	0	2	18	0	NO	Peru	TUMBES	TUMBES	TUMBES	Mestizo		NO		NO				0	0	0	1	1	0	0	0	0	0	0	0	0	0	0	0	0		0
espr_0295	297	4	10/30/2020	797	1	4	3	0	1	0	SI	10/13/2020	SI	0
espr_0296	298	0	10/30/2020	797	1	4	3	0	1	0	SI	10/13/2020	SI	0	0	29	0	NO	Peru	TUMBES	TUMBES	TUMBES	Mestizo		NO		NO				0	1	0	0	1	0	0	0	0	0	0	0	0	0	0	0	0		0
espr_0297	299	0	10/30/2020	797	1	4	3	0	1	0	SI	10/13/2020	SI	0	0	10	1	NO	Peru	TUMBES	TUMBES	TUMBES	Mestizo		NO		NO				0	0	0	0	0	0	0	0	0	0	0	0	0	0	0	0	0		0
espr_0298	300	4	10/30/2020	797	1	4	3	0	1	0	SI	10/13/2020	SI	0
espr_0299	301	0	10/30/2020	795	1	4	3	0	1	0	SI	10/13/2020	SI	0	2	54	1	NO	Peru	TUMBES	TUMBES	TUMBES	Mestizo	2020-03-06	NO		NO				1	1	1	1	1	0	0	1	1	0	0	0	0	0	0	0	0		38
espr_0300	302	3	10/30/2020	795	1	4	3	0	1	0	SI	10/13/2020	SI	0	2	56	0	NO	Peru	TUMBES	TUMBES	TUMBES	Mestizo		NO		NO				0	1	0	1	1	0	0	0	0	0	0	0	0	0	0	0	0		0
espr_0301	303	0	10/30/2020	795	1	4	3	0	1	0	SI	10/13/2020	SI	0	0	21	0	NO	Peru	TUMBES	TUMBES	TUMBES	Mestizo		NO		NO				0	0	0	0	0	0	0	0	0	0	0	0	0	0	0	0	0		0
espr_0302	304	4	10/30/2020	795	1	4	3	0	1	0	SI	10/13/2020	SI	0
espr_0303	305	0	10/30/2020	733	1	4	4	0	1	0	SI	10/13/2020	SI	0	1	49	1	NO	Peru	TUMBES	TUMBES	TUMBES	Mestizo	6/15/2020	NO		NO				0	1	1	1	0	0	0	0	0	0	0	0	0	0	0	0	0		0
espr_0304	306	0	10/30/2020	733	1	4	4	0	1	0	SI	10/13/2020	SI	0	0	45	0	NO	Peru	TUMBES	ZARUMILLA	AGUAS VERDES	Mestizo	6/30/2020	NO		NO				0	1	1	1	0	0	0	0	0	0	0	0	0	0	0	0	0	0	0
espr_0305	307	0	10/30/2020	733	1	4	4	0	1	0	SI	10/13/2020	SI	0	0	22	0	NO	Peru	TUMBES	TUMBES	TUMBES	Mestizo		NO		NO				0	0	0	0	0	0	0	0	0	0	0	0	0	0	0	0	0	0	0
espr_0306	308	0	10/30/2020	733	1	4	4	0	1	0	SI	10/13/2020	SI	0	0	13	1	NO	Peru	TUMBES	TUMBES	TUMBES	Mestizo		NO		NO				0	0	0	0	0	0	0	0	0	0	0	0	0	0	0	0	0	0	0
espr_0307	309	4	10/30/2020	596	1	4	3	0	1	0	SI	10/13/2020	SI	0
espr_0308	310	0	10/30/2020	596	1	4	3	0	1	0	SI	10/13/2020	SI	0	2	20	0	NO	Peru	TUMBES	TUMBES	TUMBES	Mestizo	6/15/2020	NO		NO				1	1	0	1	1	0	1	0	0	0	0	0	0	0	1	1	0		1
espr_0309	311	4	10/30/2020	596	1	4	3	0	1	0	SI	10/13/2020	SI	0
espr_0310	312	0	10/30/2020	596	1	4	3	0	1	0	SI	10/13/2020	SI	0	0	40	1	NO	Peru	TUMBES	TUMBES	TUMBES	Mestizo		NO		NO				0	0	0	0	0	0	0	0	0	0	0	0	0	0	0	0	0	0	0
espr_0311	313	3	10/31/2020	639	1	2	4	0	1	0	NO		NO	0	2	67	0	NO	Peru	TUMBES	TUMBES	TUMBES	Mestizo		NO		NO				0	0	0	0	0	0	0	0	0	0	0	0	0	0	0	0	0		0
espr_0312	314	4	10/31/2020	639	1	2	4	0	1	0	NO		NO	0
espr_0313	315	0	10/31/2020	646	1	5	4	1	1	0	SI	10/15/2020	NO	3	1	39	1	NO	Peru	TUMBES	TUMBES	TUMBES	Mestizo	11/17/2020	NO		NO				0	0	0	1	0	0	0	0	0	0	0	0	0	0	0	0	0		0
espr_0314	316	0	10/31/2020	646	1	5	4	1	1	0	SI	10/15/2020	NO	3	0	32	0	NO	Peru	TUMBES	TUMBES	TUMBES	Mestizo		NO		NO				0	0	0	0	0	0	0	0	0	0	0	0	0	0	0	0	0		0
espr_0315	317	4	10/31/2020	646	1	5	4	1	1	0	SI	10/15/2020	NO	3
espr_0316	318	0	10/31/2020	646	1	5	4	1	1	0	SI	10/15/2020	NO	3	0	14	0	NO	Peru	TUMBES	TUMBES	TUMBES	Mestizo		NO		NO				0	0	0	0	0	0	0	0	0	0	0	0	0	0	0	0	0		0
espr_0317	319	0	10/31/2020	646	1	5	4	1	1	0	SI	10/15/2020	NO	3	0	7	0	NO	Peru	TUMBES	TUMBES	TUMBES	Mestizo		NO		NO				0	0	0	0	0	0	0	0	0	0	0	0	0	0	0	0	0		0
espr_0318	320	4	10/31/2020	700	1	4	5	1	1	0	NO		NO	2
espr_0319	321	3	10/31/2020	700	1	4	5	1	1	0	NO		NO	2	2	31	0	NO	Peru	TUMBES	TUMBES	TUMBES	Mestizo		NO		NO				0	0	0	0	0	0	0	0	0	0	0	0	0	0					0
espr_0320	322	0	10/31/2020	700	1	4	5	1	1	0	NO		NO	2	0	13	1	NO	Peru	TUMBES	TUMBES	TUMBES	Mestizo		NO		NO				0	0	0	0	0	0	0	0	0	0	0	0	0	0					0
espr_0321	323	0	10/31/2020	700	1	4	5	1	1	0	NO		NO	2	0	7	0	NO	Peru	TUMBES	TUMBES	TUMBES	Mestizo		NO		NO				0	0	0	0	0	0	0	0	0	0	0	0	0	0					0
espr_0322	324	0	10/31/2020	719	1	4	4	0	1	0	SI	10/15/2020	SI	0	0	35	0	NO	Peru	TUMBES	TUMBES	TUMBES	Mestizo		NO		NO				0	0	0	0	0	0	0	0	0	0	0	0	0	0	0	0	0		0
espr_0323	325	0	10/31/2020	719	1	4	4	0	1	0	SI	10/15/2020	SI	0	0	14	0	NO	Peru	TUMBES	TUMBES	TUMBES	Mestizo		NO		NO				0	0	0	0	0	0	0	0	0	0	0	0	0	0	0	0	0		0
espr_0324	326	0	10/31/2020	719	1	4	4	0	1	0	SI	10/15/2020	SI	0	0	7	0	NO	Peru	TUMBES	TUMBES	TUMBES	Mestizo		NO		NO				0	0	0	0	0	0	0	0	0	0	0	0	0	0	0	0	0		0
espr_0325	327	4	10/31/2020	719	1	4	4	0	1	0	SI	10/15/2020	SI	0
espr_0326	328	4	10/31/2020	898	1	4	5	0	1	0	NO		NO	2
espr_0327	329	0	10/31/2020	898	1	4	5	0	1	0	NO		NO	2	0	33	0	NO	Peru	TUMBES	TUMBES	TUMBES	Mestizo		NO		NO				0	0	0	0	0	0	0	0	0	0	0	0	0	0					0
espr_0328	330	0	10/31/2020	898	1	4	5	0	1	0	NO		NO	2	0	15	1	NO	Peru	TUMBES	TUMBES	TUMBES	Mestizo		NO		NO				0	0	0	0	0	0	0	0	0	0	0	0	0	0					0
espr_0329	331	0	10/31/2020	898	1	4	5	0	1	0	NO		NO	2	0	6	0	NO	Peru	TUMBES	TUMBES	TUMBES	Mestizo		NO		NO				0	0	0	0	0	0	0	0	0	0	0	0	0	0					0
espr_0330	332	0	10/31/2020	697	1	3	1	0	1	0	SI	2020-09-01	SI	2	0	30	1	NO	Peru	TUMBES	TUMBES	TUMBES	Mestizo		NO		NO				0	0	0	0	0	0	0	0	0	0	0	0	0	0	0	0	0		0
espr_0331	333	0	10/31/2020	697	1	3	1	0	1	0	SI	2020-09-01	SI	2	0	23	0	NO	Peru	TUMBES	TUMBES	TUMBES	Mestizo		NO		NO				0	0	0	0	0	0	0	0	0	0	0	0	0	0	0	0	0		0
espr_0332	334	0	10/31/2020	697	1	3	1	0	1	0	SI	2020-09-01	SI	2	0	2	0	NO	Peru	TUMBES	TUMBES	TUMBES	Mestizo		NO		NO				0	0	0	0	0	0	0	0	0	0	0	0	0	0	0	0	0		0
espr_0333	335	3	10/31/2020	965	1	7	7	0	1	0	SI	10/15/2020	SI	2	2	42	1	NO	Peru	TUMBES	TUMBES	TUMBES	Mestizo		NO		NO				0	0	0	0	0	0	0	0	0	0	0	0	0	0	0	0	0		0
espr_0334	336	3	10/31/2020	965	1	7	7	0	1	0	SI	10/15/2020	SI	2	2	37	0	NO	Peru	TUMBES	TUMBES	TUMBES	Mestizo		NO		NO				0	0	0	0	0	0	0	0	0	0	0	0	0	0	0	0	0		0
espr_0335	337	3	10/31/2020	965	1	7	7	0	1	0	SI	10/15/2020	SI	2	2	15	0	NO	Peru	TUMBES	TUMBES	TUMBES	Mestizo		NO		NO				0	0	0	0	0	0	0	0	0	0	0	0	0	0	0	0	0		0
espr_0336	338	3	10/31/2020	965	1	7	7	0	1	0	SI	10/15/2020	SI	2	2	14	1	NO	Peru	TUMBES	TUMBES	TUMBES	Mestizo		NO		NO				0	0	0	0	0	0	0	0	0	0	0	0	0	0	0	0	0		0
espr_0337	339	3	10/31/2020	965	1	7	7	0	1	0	SI	10/15/2020	SI	2	2	11	0	NO	Peru	TUMBES	TUMBES	TUMBES	Mestizo		NO		NO				0	0	0	0	0	0	0	0	0	0	0	0	0	0	0	0	0		0
espr_0338	340	3	10/31/2020	965	1	7	7	0	1	0	SI	10/15/2020	SI	2	2	2	0	NO	Peru	TUMBES	TUMBES	TUMBES	Mestizo		NO		NO				0	0	0	0	0	0	0	0	0	0	0	0	0	0	0	0	0		0
espr_0339	341	4	10/31/2020	965	1	7	7	0	1	0	SI	10/15/2020	SI	2
espr_0340	342	4	10/31/2020	828	1	1	1	0	1	0	NO		NO	3
espr_0341	343	0	10/31/2020	852	1	3	4	0	0	0	NO		NO	0	0	59	0	NO	Peru	TUMBES	TUMBES	TUMBES	Mestizo		NO		NO				0	0	0	0	0	0	0	0	0	0	0	0	0	0	0	0	0		0
espr_0342	344	0	10/31/2020	852	1	3	4	0	0	0	NO		NO	0	0	16	0	NO	Peru	TUMBES	TUMBES	TUMBES	Mestizo		NO		NO				0	0	0	0	0	0	0	0	0	0	0	0	0	0	0	0	0		0
espr_0343	345	0	10/31/2020	852	1	3	4	0	0	0	NO		NO	0	0	11	0	NO	Peru	TUMBES	TUMBES	TUMBES	Mestizo		NO		NO				0	0	0	0	0	0	0	0	0	0	0	0	0	0	0	0	0		0
espr_0344	346	3	10/30/2020	598	1	3	5	0	1	0	SI	10/15/2020	SI	0	2	79	0		Peru	TUMBES	TUMBES	TUMBES	Mestizo	9/23/2020	SI	9/26/20	SI	9/26/20	NO	SI	0	0	1	1	0	0	0	0	1	0	0	0	0	0	0	0	0		0
espr_0345	347	0	10/30/2020	598	1	3	5	0	1	0	SI	10/15/2020	SI	0	0	50	0	NO	Peru	TUMBES	TUMBES	TUMBES	Mestizo	2020-11-10	NO		NO				0	1	0	1	0	0	1	0	1	0	0	0	0	0	0	0	0		37
espr_0346	348	4	10/30/2020	598	1	3	5	0	1	0	SI	10/15/2020	SI	0
espr_0347	349	0	10/30/2020	745	1	4	5	0	1	0	SI	10/15/2020	SI	0	0	32	1	NO	Peru	TUMBES	TUMBES	TUMBES	Mestizo		NO		NO				0	0	0	0	0	0	0	0	0	0	0	0	0	0	0	0	0		0
espr_0348	350	3	10/30/2020	745	1	4	5	0	1	0	SI	10/15/2020	SI	0	2	30	0	NO	Peru	TUMBES	TUMBES	TUMBES	Mestizo		NO		NO				0	0	0	0	0	0	0	0	0	0	0	0	0	0	0	0	0		0
espr_0349	351	0	10/30/2020	745	1	4	5	0	1	0	SI	10/15/2020	SI	0	0	11	1	NO	Peru	TUMBES	TUMBES	TUMBES	Mestizo		NO		NO				0	0	0	0	0	0	0	0	0	0	0	0	0	0	0	0	0		0
espr_0350	352	0	10/30/2020	745	1	4	5	0	1	0	SI	10/15/2020	SI	0	0	9	1	NO	Peru	TUMBES	TUMBES	TUMBES	Mestizo		NO		NO				0	0	0	0	0	0	0	0	0	0	0	0	0	0					0
espr_0351	353	0	10/30/2020	609	1	2	5	0	1	0	NO		SI	0	0	75	1	NO	Peru	TUMBES	TUMBES	TUMBES	Mestizo		NO		NO				0	0	0	0	0	0	0	0	0	0	0	0	0	0	0	0	0		0
espr_0352	354	0	10/30/2020	609	1	2	5	0	1	0	NO		SI	0	0	71	0	NO	Peru	TUMBES	TUMBES	TUMBES	Mestizo		NO		NO				0	0	0	0	0	0	0	0	0	0	0	0	0	0	0	0	0		0
espr_0353	355	4	10/30/2020	608	1	4	5	0	1	0	NO		NO	0
espr_0354	356	0	10/30/2020	608	1	4	5	0	1	0	NO		NO	0	0	45	0	NO	Peru	TUMBES	TUMBES	TUMBES	Mestizo		NO		NO				0	0	0	0	0	0	0	0	0	0	0	0	0	0	0	0	0		0
espr_0355	357	0	10/30/2020	608	1	4	5	0	1	0	NO		NO	0	0	18	0	NO	Peru	TUMBES	TUMBES	TUMBES	Mestizo		NO		NO				0	0	0	0	0	0	0	0	0	0	0	0	0	0	0	0	0		0
espr_0356	358	4	10/30/2020	608	1	4	5	0	1	0	NO		NO	0
espr_0357	359	4	10/31/2020	617	1	5	5	0	1	0	NO		SI	2
espr_0358	360	0	10/31/2020	617	1	5	5	0	1	0	NO		SI	2	0	35	0	NO	Peru	TUMBES	TUMBES	TUMBES	Mestizo		NO		NO				0	0	0	0	0	0	0	0	0	0	0	0	0	0	0	0	0		0
espr_0359	361	0	10/31/2020	617	1	5	5	0	1	0	NO		SI	2	0	15	0	NO	Peru	TUMBES	TUMBES	TUMBES	Mestizo		NO		NO				0	0	0	0	0	0	0	0	0	0	0	0	0	0	0	0	0		0
espr_0360	362	0	10/31/2020	617	1	5	5	0	1	0	NO		SI	2	0	9	0	NO	Peru	TUMBES	TUMBES	TUMBES	Mestizo		NO		NO				0	0	0	0	0	0	0	0	0	0	0	0	0	0	0	0	0		0
espr_0361	363	4	10/31/2020	617	1	5	5	0	1	0	NO		SI	2
espr_0362	364	0	10/31/2020	629	1	3	2	0	1	0	SI	10/25/2020	SI	0	0	27	1	NO	Peru	TUMBES	TUMBES	TUMBES	Mestizo		NO		NO				0	0	0	0	0	0	0	0	0	0	0	0	0	0					0
espr_0363	365	0	10/31/2020	629	1	3	2	0	1	0	SI	10/25/2020	SI	0	0	26	0	NO	Peru	TUMBES	TUMBES	TUMBES	Mestizo		NO		NO				0	0	0	0	0	0	0	0	0	0	0	0	0	0	0	0	0		0
espr_0364	366	4	10/31/2020	629	1	3	2	0	1	0	SI	10/25/2020	SI	0
espr_0365	367	0	10/31/2020	873	1	1	6	0	1	0	SI	10/25/2020	SI	0	1	50	1	NO	Peru	TUMBES	TUMBES	TUMBES	Mestizo	1/29/2021	NO		NO				0	0	0	1	0	0	0	0	0	0	0	0	0	0	0	0	0		0
espr_0366	368	4	10/31/2020	874	1	6	4	0	0	0	NO		NO	0
espr_0367	369	4	10/31/2020	874	1	6	4	0	0	0	NO		NO	0
espr_0368	370	0	10/31/2020	874	1	6	4	0	0	0	NO		NO	0	1	25	0	SI	Peru	TUMBES	TUMBES	TUMBES	Mestizo	11/17/2020	NO		NO				0	0	0	1	0	0	0	0	0	0	0	0	0	0	0	0	0		0
espr_0369	371	0	10/31/2020	874	1	6	4	0	0	0	NO		NO	0	0	9	0	SI	Peru	TUMBES	TUMBES	TUMBES	Mestizo		NO		NO				0	0	0	0	0	0	0	0	0	0	0	0	0	0	0	0	0		0
espr_0370	372	0	10/31/2020	874	1	6	4	0	0	0	NO		NO	0	0	6	1	SI	Peru	TUMBES	TUMBES	TUMBES	Mestizo		NO		NO				0	0	0	0	0	0	0	0	0	0	0	0	0	0	0	0	0		0
espr_0371	373	0	10/31/2020	874	1	6	4	0	0	0	NO		NO	0	0	2	1	NO	Peru	TUMBES	TUMBES	TUMBES	Mestizo		NO		NO				0	0	0	0	0	0	0	0	0	0	0	0	0	0	0	0	0		0
espr_0372	374	0	10/31/2020	878	1	7	6	0	1	0	SI	10/23/2020	SI	0	0	45	1	NO	Peru	TUMBES	TUMBES	TUMBES	Mestizo		NO		NO				0	0	0	0	0	0	0	0	0	0	0	0	0	0	0	0	0		0
espr_0373	375	0	10/31/2020	878	1	7	6	0	1	0	SI	10/23/2020	SI	0	0	43	0	NO	Peru	TUMBES	TUMBES	TUMBES	Mestizo		NO		NO				0	0	0	0	0	0	0	0	0	0	0	0	0	0	0	0	0		0
espr_0374	376	0	10/31/2020	878	1	7	6	0	1	0	SI	10/23/2020	SI	0	0	19	0	NO	Peru	TUMBES	TUMBES	TUMBES	Mestizo		NO		NO				0	0	0	0	0	0	0	0	0	0	0	0	0	0	0	0	0		0
espr_0375	377	0	10/31/2020	878	1	7	6	0	1	0	SI	10/23/2020	SI	0	0	16	0	NO	Peru	TUMBES	TUMBES	TUMBES	Mestizo		NO		NO				0	0	0	0	0	0	0	0	0	0	0	0	0	0	0	0	0		0
espr_0376	378	0	10/31/2020	878	1	7	6	0	1	0	SI	10/23/2020	SI	0	0	14	0	NO	Peru	TUMBES	TUMBES	TUMBES	Mestizo		NO		NO				0	0	0	0	0	0	0	0	0	0	0	0	0	0	0	0	0		0
espr_0377	379	0	10/31/2020	878	1	7	6	0	1	0	SI	10/23/2020	SI	0	0	11	0	NO	Peru	TUMBES	TUMBES	TUMBES	Mestizo		NO		NO				0	0	0	0	0	0	0	0	0	0	0	0	0	0	0	0	0		0
espr_0378	380	0	10/31/2020	878	1	7	6	0	1	0	SI	10/23/2020	SI	0	0	4	1	NO	Peru	TUMBES	TUMBES	TUMBES	Mestizo		NO		NO				0	0	0	0	0	0	0	0	0	0	0	0	0	0	0	0	0		0
espr_0379	381	0	10/31/2020	823	1	3	4	0	1	0	SI	10/23/2020	SI	0	0	73	0	NO	Peru	TUMBES	TUMBES	TUMBES	Mestizo	8/24/2020	NO		NO				0	0	0	1	0	0	1	0	0	0	0	0	0	0	0	0	0		0
espr_0380	382	0	10/31/2020	823	1	3	4	0	1	0	SI	10/23/2020	SI	0	0	55	0	NO	Peru	TUMBES	TUMBES	TUMBES	Afrodescendiente		NO		NO				0	0	0	0	0	0	0	0	0	0	0	0	0	0	0	0	0		0
espr_0381	383	4	10/31/2020	823	1	3	4	0	1	0	SI	10/23/2020	SI	0
espr_0382	384	0	10/31/2020	846	1	4	5	0	1	0	SI	10/15/2020	SI	0	0	56	1	NO	Peru	TUMBES	TUMBES	TUMBES	Mestizo		NO		NO				0	0	0	0	0	0	0	0	0	0	0	0	0	0					0
espr_0383	385	1	10/31/2020	846	1	4	5	0	1	0	SI	10/15/2020	SI	0	2	55	0		Peru	TUMBES	TUMBES	TUMBES	Mestizo	11/19/2020	NO		NO				0	0	0	1	0	0	0	0	0	0	0	0	0	0	0	0	0		0
espr_0384	386	0	10/31/2020	846	1	4	5	0	1	0	SI	10/15/2020	SI	0	0	15	1	NO	Peru	TUMBES	TUMBES	TUMBES	Mestizo		NO		NO				0	0	0	0	0	0	0	0	0	0	0	0	0	0					0
espr_0385	387	0	10/31/2020	846	1	4	5	0	1	0	SI	10/15/2020	SI	0	2	82	0	NO	Peru	TUMBES	TUMBES	TUMBES	Mestizo		NO		NO				0	0	0	0	0	0	0	0	0	0	0	0	0	0					0
espr_0386	388	4	10/31/2020	738	1	4	4	0	1	0	SI	10/20/2020	SI	0
espr_0387	389	3	10/31/2020	738	1	4	4	0	1	0	SI	10/20/2020	SI	0	2	67	0	NO	Peru	TUMBES	TUMBES	TUMBES	Mestizo		NO		NO				0	0	0	0	0	0	0	0	0	0	0	0	0	0	0	0	0		0
espr_0388	390	4	10/31/2020	738	1	4	4	0	1	0	SI	10/20/2020	SI	0
espr_0389	391	4	10/31/2020	738	1	4	4	0	1	0	SI	10/20/2020	SI	0
espr_0390	392	0	10/31/2020	737	1	5	5	0	1	0	SI	10/20/2020	SI	0	0	52	1	NO	Peru	TUMBES	TUMBES	TUMBES	Mestizo		NO		NO				0	0	0	0	0	0	0	0	0	0	0	0	0	0	0	0	0		0
espr_0391	393	0	10/31/2020	737	1	5	5	0	1	0	SI	10/20/2020	SI	0	2	45	0	NO	Peru	TUMBES	TUMBES	TUMBES	Mestizo		NO		NO				0	0	0	0	0	0	0	0	0	0	0	0	0	0	0	0	0		37
espr_0392	394	0	10/31/2020	737	1	5	5	0	1	0	SI	10/20/2020	SI	0	0	28	1	NO	Peru	TUMBES	TUMBES	TUMBES	Mestizo		NO		NO				0	0	0	0	0	0	0	0	0	0	0	0	0	0	0	0	0		0
espr_0393	395	0	10/31/2020	737	1	5	5	0	1	0	SI	10/20/2020	SI	0	0	23	1	NO	Peru	TUMBES	TUMBES	TUMBES	Mestizo		NO		NO				0	0	0	0	0	0	0	0	0	0	0	0	0	0	0	0	0		0
espr_0394	396	0	10/31/2020	737	1	5	5	0	1	0	SI	10/20/2020	SI	0	0	12	1	NO	Peru	TUMBES	TUMBES	TUMBES	Mestizo		NO		NO				0	0	0	0	0	0	0	0	0	0	0	0	0	0	0	0	0		0
espr_0395	397	0	10/31/2020	703	1	3	4	0	1	0	SI	10/15/2020	SI	0	0	48	1	NO	Peru	TUMBES	TUMBES	TUMBES	Mestizo		NO		NO				0	0	0	0	0	0	0	0	0	0	0	0	0	0	0	0	0		0
espr_0396	398	0	10/31/2020	703	1	3	4	0	1	0	SI	10/15/2020	SI	0	0	40	0	NO	Peru	TUMBES	TUMBES	TUMBES	Mestizo		NO		NO				0	0	0	0	0	0	0	0	0	0	0	0	0	0	0	0	0		0
espr_0397	399	0	10/31/2020	703	1	3	4	0	1	0	SI	10/15/2020	SI	0	0	17	1	NO	Peru	TUMBES	TUMBES	TUMBES	Mestizo		NO		NO				0	0	0	0	0	0	0	0	0	0	0	0	0	0	0	0	0		0
espr_0398	400	0	10/31/2020	929	1	3	4	0	1	0	SI	10/15/2020	SI	0	2	45	1	NO	Peru	TUMBES	TUMBES	TUMBES		10/29/2020	NO		NO				0	1	1	1	0	0	0	0	0	0	0	0	0	0	0	0	0		0
espr_0399	401	0	10/31/2020	929	1	3	4	0	1	0	SI	10/15/2020	SI	0	0	46	0	NO	Peru	TUMBES	TUMBES	TUMBES	Mestizo		NO		NO				0	0	0	0	0	0	0	0	0	0	0	0	0	0					0
espr_0400	402	0	10/31/2020	929	1	3	4	0	1	0	SI	10/15/2020	SI	0	0	14	1	NO	Peru	TUMBES	TUMBES	TUMBES	Mestizo		NO		NO				0	0	0	0	0	0	0	0	0	0	0	0	0	0					0
espr_0401	403	0	10/31/2020	977	1	4	4	0	1	0	SI	2020-03-01	SI	0	0	32	1	NO	Peru	TUMBES	TUMBES	TUMBES	Mestizo		NO		NO				0	0	0	0	0	0	0	0	0	0	0	0	0	0	0	0	0		0
espr_0402	404	0	10/31/2020	977	1	4	4	0	1	0	SI	2020-03-01	SI	0	0	35	0	NO	Peru	TUMBES	TUMBES	TUMBES	Mestizo		NO		NO				0	0	0	0	0	0	0	0	0	0	0	0	0	0	0	0	0		0
espr_0403	405	0	10/31/2020	977	1	4	4	0	1	0	SI	2020-03-01	SI	0	0	11	1	NO	Peru	TUMBES	TUMBES	TUMBES	Mestizo		NO		NO				0	0	0	0	0	0	0	0	0	0	0	0	0	0	0	0	0		0
espr_0404	406	0	10/31/2020	977	1	4	4	0	1	0	SI	2020-03-01	SI	0	0	2	1	NO	Peru	TUMBES	TUMBES	TUMBES	Mestizo		NO		NO				0	0	0	0	0	0	0	0	0	0	0	0	0	0	0	0	0		0
espr_0405	407	0	10/31/2020	978	1	4	3	0	1	0	SI	2020-03-01	SI	0	0	33	0	NO	Peru	TUMBES	TUMBES	TUMBES	Mestizo		NO		NO				0	0	0	0	0	0	0	0	0	0	0	0	0	0	0	0	0		0
espr_0406	408	0	10/31/2020	978	1	4	3	0	1	0	SI	2020-03-01	SI	0	0	15	1	NO	Peru	TUMBES	TUMBES	TUMBES	Mestizo		NO		NO				0	0	0	0	0	0	0	0	0	0	0	0	0	0	0	0	0		0
espr_0407	409	0	10/31/2020	978	1	4	3	0	1	0	SI	2020-03-01	SI	0	0	9	1	NO	Peru	TUMBES	TUMBES	TUMBES	Mestizo		NO		NO				0	0	0	0	0	0	0	0	0	0	0	0	0	0	0	0	0		0
espr_0408	410	0	10/31/2020	978	1	4	3	0	1	0	SI	2020-03-01	SI	0	0	5	1	NO	Peru	TUMBES	TUMBES	TUMBES	Mestizo		NO		NO				0	0	0	0	0	0	0	0	0	0	0	0	0	0	0	0	0		0
espr_0409	411	0	10/31/2020	826	1	5	4	0	1	0	SI	2020-03-01	SI	0	0	45	1	NO	Peru	TUMBES	TUMBES	TUMBES	Mestizo		NO		NO				0	0	0	0	0	0	0	0	0	0	0	0	0	0					0
espr_0410	412	0	10/31/2020	826	1	5	4	0	1	0	SI	2020-03-01	SI	0	0	37	0	NO	Peru	TUMBES	TUMBES	TUMBES	Mestizo		NO		NO				0	0	0	0	0	0	0	0	0	0	0	0	0	0					0
espr_0411	413	0	10/31/2020	826	1	5	4	0	1	0	SI	2020-03-01	SI	0	0	13	1	NO	Peru	TUMBES	TUMBES	TUMBES	Mestizo		NO		NO				0	0	0	0	0	0	0	0	0	0	0	0	0	0					0
espr_0412	414	0	10/31/2020	826	1	5	4	0	1	0	SI	2020-03-01	SI	0	0	8	1	NO	Peru	TUMBES	TUMBES	TUMBES	Mestizo		NO		NO				0	0	0	0	0	0	0	0	0	0	0	0	0	0					0
espr_0413	415	4	10/31/2020	826	1	5	4	0	1	0	SI	2020-03-01	SI	0
espr_0414	416	0	10/31/2020	853	1	2	4	0	1	0	SI	2020-03-01	SI	0	0	57	0	NO	Peru	TUMBES	TUMBES	TUMBES	Mestizo		NO		NO				0	0	0	0	0	0	0	0	0	0	0	0	0	0					0
espr_0415	417	0	10/31/2020	853	1	2	4	0	1	0	SI	2020-03-01	SI	0	0	57	1	NO	Peru	TUMBES	TUMBES	TUMBES	Mestizo		NO		NO				0	0	0	0	0	0	0	0	0	0	0	0	0	0					0
espr_0416	418	1	10/30/2020	747	1	4	4	0	0	0	SI	10/15/2020	SI	0	2	46	1	NO	Peru	TUMBES	TUMBES	TUMBES	Mestizo		NO		NO				0	0	0	0	0	0	0	0	0	0	0	0	0	0	0	0	0		0
espr_0417	419	0	10/30/2020	747	1	4	4	0	0	0	SI	10/15/2020	SI	0	0	47	0	NO	Peru	TUMBES	TUMBES	TUMBES	Mestizo		NO		NO				0	0	0	0	0	0	0	0	0	0	0	0	0	0	0	0	0		0
espr_0418	420	0	10/30/2020	747	1	4	4	0	0	0	SI	10/15/2020	SI	0	0	6	0	NO	Peru	TUMBES	TUMBES	TUMBES	Mestizo		NO		NO				0	0	0	0	0	0	0	0	0	0	0	0	0	0	0	0	0		0
espr_0419	421	4	10/30/2020	747	1	4	4	0	0	0	SI	10/15/2020	SI	0
espr_0420	422	0	10/31/2020	665	1	3	3	0	1	0	SI	10/20/2020	NO	0	0	75	1	NO	Peru	TUMBES	TUMBES	TUMBES	Mestizo		NO		NO				0	0	0	0	0	0	0	0	0	0	0	0	0	0	0	0	0		0
espr_0421	423	0	10/31/2020	665	1	3	3	0	1	0	SI	10/20/2020	NO	0	0	71	0	NO	Peru	TUMBES	TUMBES	TUMBES	Mestizo		NO		NO				0	0	0	0	0	0	0	0	0	0	0	0	0	0	0	0	0		0
espr_0422	424	2	10/31/2020	665	1	3	3	0	1	0	SI	10/20/2020	NO	0	2	45	0	NO	Peru	TUMBES	TUMBES	TUMBES	Mestizo		NO		SI	11/14/2020			0	0	0	0	0	0	0	0	0	0	0	0	0	0	0	0	0		0
espr_0423	425	0	10/31/2020	835	1	5	4	0	1	0	SI	10/20/2020	NO	0	2	32	1	NO	Peru	TUMBES	TUMBES	TUMBES	Mestizo	8/15/2020	NO		NO				0	0	0	1	1	0	0	0	1	0	0	0	0	0	0	0	0		0
espr_0424	426	4	10/31/2020	835	1	5	4	0	1	0	SI	10/20/2020	NO	0
espr_0425	427	4	10/31/2020	835	1	5	4	0	1	0	SI	10/20/2020	NO	0
espr_0426	428	4	10/31/2020	835	1	5	4	0	1	0	SI	10/20/2020	NO	0
espr_0427	429	4	10/31/2020	835	1	5	4	0	1	0	SI	10/20/2020	NO	0
espr_0428	430	0	10/31/2020	870	1	4	4	0	1	0	SI	10/20/2020	NO	0	0	44	1	NO	Peru	TUMBES	TUMBES	TUMBES	Mestizo		NO		NO				0	0	0	0	0	0	0	0	0	0	0	0	0	0	0	0	0		0
espr_0429	431	0	10/31/2020	870	1	4	4	0	1	0	SI	10/20/2020	NO	0	0	42	0	NO	Peru	TUMBES	TUMBES	TUMBES	Mestizo		NO		NO				0	0	0	0	0	0	0	0	0	0	0	0	0	0	0	0	0		0
espr_0430	432	0	10/31/2020	870	1	4	4	0	1	0	SI	10/20/2020	NO	0	0	20	0	NO	Peru	TUMBES	TUMBES	TUMBES	Mestizo		NO		NO				0	0	0	0	0	0	0	0	0	0	0	0	0	0	0	0	0		0
espr_0431	433	0	10/31/2020	870	1	4	4	0	1	0	SI	10/20/2020	NO	0	0	11	1	NO	Peru	TUMBES	TUMBES	TUMBES	Mestizo		NO		NO				0	0	0	0	0	0	0	0	0	0	0	0	0	0	0	0	0		0
espr_0432	434	0	10/31/2020	849	1	3	4	0	0	0	NO		NO	0	0	54	1	NO	Peru	TUMBES	TUMBES	TUMBES	Mestizo		NO		NO				0	0	0	0	0	0	0	0	0	0	0	0	0	0					0
espr_0433	435	0	10/31/2020	849	1	3	4	0	0	0	NO		NO	0	0	50	0	NO	Peru	TUMBES	TUMBES	TUMBES	Mestizo		NO		NO				0	0	0	0	0	0	0	0	0	0	0	0	0	0					0
espr_0434	436	0	10/31/2020	849	1	3	4	0	0	0	NO		NO	0	0	11	0	NO	Peru	TUMBES	TUMBES	TUMBES	Mestizo		NO		NO				0	0	0	0	0	0	0	0	0	0	0	0	0	0					0
espr_0435	437	4	10/31/2020	830	1	3	3	0	1	0	SI	10/15/2020	NO	0
espr_0436	438	0	10/31/2020	830	1	3	3	0	1	0	SI	10/15/2020	NO	0	0	28	0	NO	Peru	TUMBES	ZARUMILLA	ZARUMILLA		2021-03-01	NO						0	0	1	0	0	0	0	0	0	0	0	0	0	0	0	0	0		0
espr_0437	439	0	10/31/2020	830	1	3	3	0	1	0	SI	10/15/2020	NO	0	1	20	1	NO	Peru	TUMBES	TUMBES	TUMBES	Mestizo	11/17/2020	NO		NO				0	0	0	1	0	0	0	0	0	0	0	0	0	0	0	0	0		0
espr_0438	440	0	10/31/2020	936	1	4	4	0	1	0	SI	10/15/2020	NO	0	0	51	0	NO	Peru	TUMBES	TUMBES	TUMBES	Mestizo		NO		NO				0	0	0	0	0	0	0	0	0	0	0	0	0	0					0
espr_0439	441	4	10/31/2020	936	1	4	4	0	1	0	SI	10/15/2020	NO	0
espr_0440	442	4	10/31/2020	936	1	4	4	0	1	0	SI	10/15/2020	NO	0
espr_0441	443	3	10/31/2020	936	1	4	4	0	1	0	SI	10/15/2020	NO	0	2	8	1	NO	Peru	TUMBES	TUMBES	TUMBES	Mestizo		NO		NO				0	0	0	0	0	0	0	0	0	0	0	0	0	0					0
espr_0442	444	0	10/31/2020	711	1	4	3	0	1	0	SI	10/15/2020	NO	0	1	29	0	NO	Peru	TUMBES	TUMBES	TUMBES	Mestizo	11/14/2020	NO		NO				0	0	0	1	1	0	0	0	0	0	0	0	0	0	0	0	0		0
espr_0443	445	0	10/31/2020	711	1	4	3	0	1	0	SI	10/15/2020	NO	0	0	8	0	NO	Peru	TUMBES	TUMBES	TUMBES	Mestizo		NO		NO				0	0	0	0	0	0	0	0	0	0	0	0	0	0	0	0	0		0
espr_0444	446	4	10/31/2020	711	1	4	3	0	1	0	SI	10/15/2020	NO	0
espr_0445	447	4	10/31/2020	711	1	4	3	0	1	0	SI	10/15/2020	NO	0
espr_0446	448	0	10/31/2020	717	1	3	4	0	1	0	NO		NO	0	2	32	0	NO	Peru	TUMBES	TUMBES	TUMBES	Mestizo		NO		NO				0	0	0	1	1	0	0	0	0	0	0	0	0	0	0	0	0		0
espr_0447	449	0	10/31/2020	717	1	3	4	0	1	0	NO		NO	0	0	14	1	NO	Peru	TUMBES	TUMBES	TUMBES	Mestizo		NO		NO				0	0	0	0	0	0	0	0	0	0	0	0	0	0	0	0	0		0
espr_0448	450	0	10/31/2020	717	1	3	4	0	1	0	NO		NO	0	0	5	1	NO	Peru	TUMBES	TUMBES	TUMBES	Mestizo		NO		NO				0	0	0	0	0	0	0	0	0	0	0	0	0	0	0	0	0		0
espr_0449	451	0	10/31/2020	622	1	4	4	0	1	0	NO		NO	0	0	67	1	NO	Peru	TUMBES	TUMBES	TUMBES	Mestizo		NO		NO				0	0	0	0	0	0	0	0	0	0	0	0	0	0	0	0	0		0
espr_0450	452	0	10/31/2020	622	1	4	4	0	1	0	NO		NO	0	0	26	0	NO	Peru	TUMBES	TUMBES	TUMBES	Mestizo		NO		NO				0	0	0	0	0	0	0	0	0	0	0	0	0	0	0	0	0		0
espr_0451	453	4	10/31/2020	622	1	4	4	0	1	0	NO		NO	0
espr_0452	454	4	10/31/2020	622	1	4	4	0	1	0	NO		NO	0
espr_0453	455	4	2020-03-11	582	1	3	2	0	1	0	SI	10/18/2020	NO	0
espr_0454	456	0	2020-03-11	582	1	3	2	0	1	0	SI	10/18/2020	NO	0	0	71	0	NO	Peru	TUMBES	TUMBES	TUMBES	Mestizo		NO		NO				0	0	0	0	0	0	0	0	0	0	0	0	0	0	0	0	0	0	0
espr_0455	457	4	2020-03-11	582	1	3	2	0	1	0	SI	10/18/2020	NO	0
espr_0456	458	0	2020-04-11	626	1	3	1	0	1	0	NO		SI	0	0	36	0	NO	Peru	TUMBES	TUMBES	TUMBES	Mestizo		NO		NO				0	0	0	0	0	0	0	0	0	0	0	0	0	0					0
espr_0457	459	0	2020-04-11	626	1	3	1	0	1	0	NO		SI	0	0	9	1	NO	Peru	TUMBES	TUMBES	TUMBES	Mestizo		NO		NO				0	0	0	0	0	0	0	0	0	0	0	0	0	0					0
espr_0458	460	0	2020-04-11	626	1	3	1	0	1	0	NO		SI	0	0	4	0	NO	Peru	TUMBES	TUMBES	TUMBES	Mestizo		NO		NO				0	0	0	0	0	0	0	0	0	0	0	0	0	0					0
espr_0459	461	0	2020-04-11	672	1	1	5	0	1	0	NO		SI	0	0	52	1	NO	Peru	TUMBES	TUMBES	TUMBES	Mestizo		NO		NO				0	0	0	0	0	0	0	0	0	0	0	0	0	0	0	0	0		0
espr_0460	462	4	2020-02-11	712	1	3	3	0	0	0	NO		SI	0
espr_0461	463	0	2020-02-11	712	1	3	3	0	0	0	NO		SI	0	2	21	0	NO	Peru	TUMBES	TUMBES	TUMBES	Mestizo	2020-06-06	NO		NO				1	1	1	1	1	1	1	1	1	1	1	1	0	0	0	0	0		0
espr_0462	464	0	2020-02-11	712	1	3	3	0	0	0	NO		SI	0	0	4	0	NO	Peru	TUMBES	TUMBES	TUMBES	Mestizo		NO		NO				0	0	0	0	0	0	0	0	0	0	0	0	0	0	0	0	0		0
espr_0463	465	4	2020-02-11	714	1	5	5	0	0	0	NO		NO	0
espr_0464	466	0	2020-02-11	714	1	5	5	0	0	0	NO		NO	0	0	42	0	NO	Peru	TUMBES	TUMBES	TUMBES	Mestizo		NO		NO				0	0	0	0	0	0	0	0	0	0	0	0	0	0	0	0	0		0
espr_0465	467	4	2020-02-11	714	1	5	5	0	0	0	NO		NO	0
espr_0466	468	0	2020-02-11	714	1	5	5	0	0	0	NO		NO	0	2	19	1	NO	Peru	TUMBES	TUMBES	TUMBES	Mestizo		NO		NO				0	0	0	0	0	0	0	0	0	0	0	0	0	0	0	0	0		0
espr_0467	469	0	2020-02-11	714	1	5	5	0	0	0	NO		NO	0	0	11	0	NO	Peru	TUMBES	TUMBES	TUMBES	Mestizo		NO		NO				0	0	0	0	0	0	0	0	0	0	0	0	0	0	0	0	0		0
espr_0468	470	4	2020-02-11	716	1	4	4	0	1	0	NO		NO	0
espr_0469	471	0	2020-02-11	716	1	4	4	0	1	0	NO		NO	0	0	50	0	NO	Peru	TUMBES	TUMBES	TUMBES	Mestizo		NO		NO				0	0	0	0	0	0	0	0	0	0	0	0	0	0	0	0	0		0
espr_0470	472	0	2020-02-11	716	1	4	4	0	1	0	NO		NO	0	0	17	1	NO	Peru	TUMBES	TUMBES	TUMBES	Mestizo		NO		NO				0	0	0	0	0	0	0	0	0	0	0	0	0	0	0	0	0		0
espr_0471	473	0	2020-02-11	716	1	4	4	0	1	0	NO		NO	0	0	12	1	NO	Peru	TUMBES	TUMBES	TUMBES	Mestizo		NO		NO				0	0	0	0	0	0	0	0	0	0	0	0	0	0	0	0	0		0
espr_0472	474	0	2020-02-11	723	1	4	4	0	1	0	NO		NO	0	0	70	1	NO	Peru	TUMBES	TUMBES	TUMBES	Mestizo		NO		NO				0	0	0	0	0	0	0	0	0	0	0	0	0	0					0
espr_0473	475	0	2020-02-11	723	1	4	4	0	1	0	NO		NO	0	0	61	0	NO	Peru	TUMBES	TUMBES	TUMBES	Mestizo	8/29/2020	DESCONOCIDO		NO				1	1	0	1	0	0	0	0	0	0	0	0	0	0	0	0	0		0
espr_0474	476	0	2020-02-11	723	1	4	4	0	1	0	NO		NO	0	0	40	0	NO	Peru	TUMBES	TUMBES	TUMBES	Mestizo	2020-02-08	DESCONOCIDO		NO				1	1	0	1	0	0	0	0	0	0	0	0	0	0	0	0	0		0
espr_0475	477	0	2020-02-11	723	1	4	4	0	1	0	NO		NO	0	0	42	1	NO	Peru	TUMBES	TUMBES	TUMBES	Mestizo		NO		NO				0	0	0	0	0	0	0	0	0	0	0	0	0	0					0
espr_0476	478	0	2020-02-11	724	1	1	2	0	1	0	NO		NO	0	0	70	0	NO	Peru	TUMBES	TUMBES	TUMBES	Mestizo		NO		NO				0	0	0	0	0	0	0	0	0	0	0	0	0	0	0	0	0	0	0
espr_0477	479	0	2020-02-11	725	1	2	4	0	0	0	NO		NO	0	0	65	0	NO	Peru	TUMBES	TUMBES	TUMBES	Mestizo		NO		NO				0	0	0	0	0	0	0	0	0	0	0	0	0	0					0
espr_0478	480	0	2020-02-11	725	1	2	4	0	0	0	NO		NO	0	0	39	0	NO	Peru	TUMBES	TUMBES	TUMBES	Mestizo		NO		NO				0	0	0	0	0	0	0	0	0	0	0	0	0	0					0
espr_0479	481	0	10/30/2020	754	1	6	5	0	1	0	SI	11/18/2020	SI	0	0	57	1	NO	Peru	TUMBES	TUMBES	TUMBES	Mestizo	2020-01-08	NO		NO				1	0	0	0	1	0	1	0	1	0	0	0	0	0	0	0	0		0
espr_0480	482	3	10/30/2020	754	1	6	5	0	1	0	SI	11/18/2020	SI	0	2	63	0	NO	Peru	TUMBES	TUMBES	TUMBES	Mestizo	2020-01-08	NO		NO				1	0	0	0	0	0	0	0	1	0	0	0	0	0	1	1	0		0
espr_0481	483	2	10/30/2020	754	1	6	5	0	1	0	SI	11/18/2020	SI	0	2	27	0	NO	Peru	TUMBES	TUMBES	TUMBES	Mestizo	7/31/2020	NO		NO				0	1	1	0	0	0	0	0	0	0	0	0	0	0	0	0	0		0
espr_0482	484	0	10/30/2020	754	1	6	5	0	1	0	SI	11/18/2020	SI	0	0	24	1	NO	Peru	TUMBES	TUMBES	TUMBES			NO		NO				0	0	0	0	0	0	0	0	0	0	0	0	0	0	0	0	0		0
espr_0483	485	0	10/30/2020	754	1	6	5	0	1	0	SI	11/18/2020	SI	0	0	22	0	NO	Peru	TUMBES	TUMBES	TUMBES	Mestizo		NO		NO				0	0	0	0	0	0	0	0	0	0	0	0	0	0	0	0	0		0
espr_0484	486	0	10/30/2020	754	1	6	5	0	1	0	SI	11/18/2020	SI	0	0	3	0	NO	Peru	TUMBES	TUMBES	TUMBES	Mestizo		NO		NO				0	0	0	0	0	0	0	0	0	0	0	0	0	0	0	0	0		0
espr_0485	487	0	2020-03-11	763	1	4	5	0	1	0	NO		SI	0	0	49	1	NO	Peru	TUMBES	TUMBES	TUMBES	Mestizo		NO		NO				0	0	0	0	0	0	0	0	0	0	0	0	0	0					0
espr_0486	488	4	2020-03-11	763	1	4	5	0	1	0	NO		SI	0
espr_0487	489	0	2020-03-11	763	1	4	5	0	1	0	NO		SI	0	0	22	1	NO	Peru	TUMBES	TUMBES	TUMBES	Mestizo		NO		NO				0	0	0	0	0	0	0	0	0	0	0	0	0	0					0
espr_0488	490	4	2020-03-11	763	1	4	5	0	1	0	NO		SI	0
espr_0489	491	0	2020-03-11	771	1	3	5	0	1	0	NO		SI	0	0	39	0	NO	Peru	TUMBES	TUMBES	TUMBES	Mestizo		NO		NO				0	0	0	0	0	0	0	0	0	0	0	0	0	0	0	0	0		0
espr_0490	492	0	2020-03-11	771	1	3	5	0	1	0	NO		SI	0	0	11	1	NO	Peru	TUMBES	TUMBES	TUMBES	Mestizo		NO		NO				0	0	0	0	0	0	0	0	0	0	0	0	0	0	0	0	0		0
espr_0491	493	0	2020-03-11	771	1	3	5	0	1	0	NO		SI	0	0	3	0	NO	Peru	TUMBES	TUMBES	TUMBES	Mestizo		NO		NO				0	0	0	0	0	0	0	0	0	0	0	0	0	0	0	0	0		0
espr_0492	494	4	2020-03-11	774	1	4	4	0	1	0	SI	11/20/2020	SI	0
espr_0493	495	0	2020-03-11	774	1	4	4	0	1	0	SI	11/20/2020	SI	0	0	36	0	NO	Peru	TUMBES	TUMBES	TUMBES	Mestizo		NO		NO				0	0	0	0	0	0	0	0	0	0	0	0	0	0					0
espr_0494	496	0	2020-03-11	774	1	4	4	0	1	0	SI	11/20/2020	SI	0	0	16	0	NO	Peru	TUMBES	TUMBES	TUMBES	Mestizo		NO		NO				0	0	0	0	0	0	0	0	0	0	0	0	0	0					0
espr_0495	497	0	2020-03-11	774	1	4	4	0	1	0	SI	11/20/2020	SI	0	0	9	1	NO	Peru	TUMBES	TUMBES	TUMBES	Mestizo		NO		NO				0	0	0	0	0	0	0	0	0	0	0	0	0	0					0
espr_0496	498	0	2020-03-11	776	1	2	1	0	1	0	NO		SI	0	0	47	1	NO	Peru	TUMBES	TUMBES	TUMBES	Mestizo		NO		NO				0	0	0	0	0	0	0	0	0	0	0	0	0	0					0
espr_0497	499	0	2020-03-11	776	1	2	1	0	1	0	NO		SI	0	0	47	0	NO	Peru	TUMBES	TUMBES	TUMBES	Mestizo		NO		NO				0	0	0	0	0	0	0	0	0	0	0	0	0	0					0
espr_0498	500	0	2020-03-11	788	1	2	3	0	0	0	NO		NO	0	0	21	0	NO	Peru	TUMBES	TUMBES	TUMBES	Mestizo		NO		NO				0	0	0	0	0	0	0	0	0	0	0	0	0	0					0
espr_0499	501	0	2020-03-11	788	1	2	3	0	0	0	NO		NO	0	0	2	1	NO	Peru	TUMBES	TUMBES	TUMBES	Mestizo		NO		NO				0	0	0	0	0	0	0	0	0	0	0	0	0	0					0
espr_0500	502	0	2020-03-11	796	1	2	4	0	0	0	NO		SI	0	0	53	1	NO	Peru	TUMBES	TUMBES	TUMBES	Mestizo		NO		NO				0	0	0	0	0	0	0	0	0	0	0	0	0	0					0
espr_0501	503	0	2020-03-11	796	1	2	4	0	0	0	NO		SI	0	0	48	0	NO	Peru	TUMBES	TUMBES	TUMBES	Mestizo		NO		NO				0	0	0	0	0	0	0	0	0	0	0	0	0	0					0
espr_0502	504	0	2020-03-11	798	1	2	3	0	0	0	NO		NO	0	0	34	0	NO	Peru	TUMBES	TUMBES	TUMBES	Mestizo		NO		NO				0	0	0	0	0	0	0	0	0	0	0	0	0	0					0
espr_0503	505	0	2020-03-11	798	1	2	3	0	0	0	NO		NO	0	0	10	0	NO	Peru	TUMBES	TUMBES	TUMBES	Mestizo		NO		NO				0	0	0	0	0	0	0	0	0	0	0	0	0	0					0
espr_0504	506	0	2020-03-11	798	1	2	3	0	0	0	NO		NO	0	0	15	0	NO	Peru	TUMBES	TUMBES	TUMBES	Mestizo		NO		NO				0	0	0	0	0	0	0	0	0	0	0	0	0	0					0
espr_0505	507	0	2020-03-11	798	1	2	3	0	0	0	NO		NO	0	0	5	1	NO	Peru	TUMBES	TUMBES	TUMBES	Mestizo		NO		NO				0	0	0	0	0	0	0	0	0	0	0	0	0	0					0
espr_0506	508	2	2020-03-11	799	1	1	2	0	1	0	NO		NO	0	2	65	0	NO	Peru	TUMBES	TUMBES	TUMBES	Mestizo		NO		SI	11/23/2020			0	0	0	0	0	0	0	0	0	0	0	0	0	0					0
espr_0507	509	0	2020-03-11	802	1	4	4	0	0	0	NO		NO	0	0	60	1	NO	Peru	TUMBES	TUMBES	TUMBES	Mestizo		NO		NO				0	0	0	0	0	0	0	0	0	0	0	0	0	0	0	0	0		0
espr_0508	510	0	2020-03-11	802	1	4	4	0	0	0	NO		NO	0	0	63	0	NO	Peru	TUMBES	TUMBES	TUMBES	Mestizo		NO		NO				0	0	0	0	0	0	0	0	0	0	0	0	0	0	0	0	0		0
espr_0509	511	0	2020-03-11	802	1	4	4	0	0	0	NO		NO	0	0	92	0	NO	Peru	TUMBES	TUMBES	TUMBES	Mestizo		NO		NO				0	0	0	0	0	0	0	0	0	0	0	0	0	0	0	0	0		0
espr_0510	512	4	2020-03-11	802	1	4	4	0	0	0	NO		NO	0
espr_0511	513	0	2020-03-11	880	1	3	5	0	1	0	SI	2020-11-01	SI	0	0	41	0	NO	Peru	TUMBES	TUMBES	TUMBES	Mestizo		NO		NO				0	0	0	0	0	0	0	0	0	0	0	0	0	0	0	0	0		0
espr_0512	514	0	2020-03-11	880	1	3	5	0	1	0	SI	2020-11-01	SI	0	0	24	1	NO	Peru	TUMBES	TUMBES	TUMBES	Mestizo		NO		NO				0	0	0	0	0	0	0	0	0	0	0	0	0	0					0
espr_0513	515	0	2020-03-11	880	1	3	5	0	1	0	SI	2020-11-01	SI	0	0	18	0	NO	Peru	TUMBES	TUMBES	TUMBES	Mestizo		NO		NO				0	0	0	0	0	0	0	0	0	0	0	0	0	0					0
espr_0514	516	0	2020-03-11	881	1	3	6	0	1	0	SI	2020-11-01	NO	0	0	43	0	NO	Peru	TUMBES	TUMBES	TUMBES		2020-08-06	NO		NO				0	1	1	1	0	1	0	0	1	0	0	0	0	0	0	0	0		0
espr_0515	517	0	2020-03-11	881	1	3	6	0	1	0	SI	2020-11-01	NO	0	0	17	0	NO	Peru	TUMBES	TUMBES	TUMBES	Mestizo		NO		NO				0	0	0	0	0	0	0	0	0	0	0	0	0	0					0
espr_0516	518	0	2020-03-11	881	1	3	6	0	1	0	SI	2020-11-01	NO	0	0	12	1	NO	Peru	TUMBES	TUMBES	TUMBES	Mestizo		NO		NO				0	0	0	0	0	0	0	0	0	0	0	0	0	0					0
espr_0517	519	0	2020-02-11	949	1	4	2	0	1	0	SI	2020-11-08	SI	0	0	57	0	NO	Peru	TUMBES	TUMBES	TUMBES	Mestizo		NO		NO				0	0	0	0	0	0	0	0	0	0	0	0	0	0					0
espr_0518	520	0	2020-02-11	949	1	4	2	0	1	0	SI	2020-11-08	SI	0	0	22	0	NO	Peru	TUMBES	TUMBES	TUMBES	Mestizo		NO		NO				0	0	0	0	0	0	0	0	0	0	0	0	0	0	0	0	0		0
espr_0519	521	0	2020-02-11	949	1	4	2	0	1	0	SI	2020-11-08	SI	0	0	5	1	NO	Peru	TUMBES	TUMBES	TUMBES	Mestizo		NO		NO				0	0	0	0	0	0	0	0	0	0	0	0	0	0	0	0	0		0
espr_0520	522	4	2020-02-11	949	1	4	2	0	1	0	SI	2020-11-08	SI	0
espr_0521	523	0	2020-02-11	960	1	3	5	0	1	0	SI	2020-11-01	NO	0	2	77	1	NO	Peru	TUMBES	TUMBES	TUMBES	Mestizo	2021-01-02	SI	2021-11-02	SI	2021-11-02	NO	SI	0	0	0	0	0	0	0	0	1	0	0	0	0	0	0	0	0		0
espr_0522	524	3	2020-02-11	960	1	3	5	0	1	0	SI	2020-11-01	NO	0	2	63	0	NO	Peru	TUMBES	TUMBES	TUMBES	Mestizo		NO		NO				0	0	0	0	0	0	0	0	0	0	0	0	0	0					0
espr_0523	525	0	2020-02-11	960	1	3	5	0	1	0	SI	2020-11-01	NO	0	0	29	1	NO	Peru	TUMBES	TUMBES	TUMBES	Mestizo		NO		NO				0	0	0	0	0	0	0	0	0	0	0	0	0	0					0
espr_0524	526	0	2020-02-11	961	1	5	4	0	1	0	SI	2020-11-01	SI	0	0	41	1	NO	Peru	TUMBES	TUMBES	TUMBES	Mestizo		NO		NO				0	0	0	0	0	0	0	0	0	0	0	0	0	0					0
espr_0525	527	0	2020-02-11	961	1	5	4	0	1	0	SI	2020-11-01	SI	0	0	33	0	NO	Peru	TUMBES	TUMBES	TUMBES	Mestizo		NO		NO				0	0	0	0	0	0	0	0	0	0	0	0	0	0					0
espr_0526	528	0	2020-02-11	961	1	5	4	0	1	0	SI	2020-11-01	SI	0	0	7	0	NO	Peru	TUMBES	TUMBES	TUMBES	Mestizo		NO		NO				0	0	0	0	0	0	0	0	0	0	0	0	0	0					0
espr_0527	529	0	2020-02-11	961	1	5	4	0	1	0	SI	2020-11-01	SI	0	0	15	0	NO	Peru	TUMBES	TUMBES	TUMBES	Mestizo		NO		NO				0	0	0	0	0	0	0	0	0	0	0	0	0	0					0
espr_0528	530	4	2020-02-11	961	1	5	4	0	1	0	SI	2020-11-01	SI	0
espr_0529	531	4	2020-02-11	1403	1	5	4	0	1	0	SI	10/19/2020	SI	0
espr_0530	532	0	2020-02-11	1403	1	5	4	0	1	0	SI	10/19/2020	SI	0	0	16	0	SI	Peru	TUMBES	TUMBES	TUMBES	Mestizo		NO		NO				0	0	0	0	0	0	0	0	0	0	0	0	0	0	0	0	0		0
espr_0531	533	0	2020-02-11	1403	1	5	4	0	1	0	SI	10/19/2020	SI	0	0	11	1		Peru	TUMBES	TUMBES	TUMBES	Mestizo		NO		NO				0	0	0	0	0	0	0	0	0	0	0	0	0	0	0	0	0	0	0
espr_0532	534	0	2020-05-11	1488	1	4	4	0	1	0	SI	10/20/2020	NO	0	0	34	1	SI	Peru	TUMBES	TUMBES	TUMBES	Mestizo		NO		NO				0	0	0	0	0	0	0	0	0	0	0	0	0	0	0	0	0		0
espr_0533	535	0	2020-05-11	1488	1	4	4	0	1	0	SI	10/20/2020	NO	0	0	26	0	SI	Peru	TUMBES	TUMBES	TUMBES	Mestizo		NO		NO				0	0	0	0	0	0	0	0	0	0	0	0	0	0	0	0	0		0
espr_0534	536	0	2020-05-11	1488	1	4	4	0	1	0	SI	10/20/2020	NO	0	0	10	1	SI	Peru	TUMBES	TUMBES	TUMBES	Mestizo	11/13/2020	NO		NO				1	0	0	1	0	0	0	0	1	0	0	0	0	0	0	0	0		0
espr_0534	537	0	2020-05-11	1488	1	4	4	0	1	0	SI	10/20/2020	NO	0	0	10	1	SI	Peru	TUMBES	TUMBES	TUMBES	Mestizo		NO		NO				0	0	0	0	0	0	0	0	0	0	0	0	0	0	0	0	0		0
espr_0535	538	0	2020-05-11	1488	1	4	4	0	1	0	SI	10/20/2020	NO	0	0	3	1	SI	Peru	TUMBES	TUMBES	TUMBES	Mestizo		NO		NO				0	0	0	0	0	0	0	0	0	0	0	0	0	0	0	0	0		0
espr_0536	539	3	2020-05-11	1496	1	3	3	0	1	0	SI	10/20/2020	NO	0	2	40	0	NO	Peru	TUMBES	TUMBES	TUMBES	Mestizo	2020-07-11	NO		NO				0	1	1	1	0	0	0	0	0	0	0	0	1	0	0	0	0		0
espr_0537	540	3	2020-05-11	1496	1	3	3	0	1	0	SI	10/20/2020	NO	0	2	11	0	NO	Peru	TUMBES	TUMBES	TUMBES	Mestizo		NO		NO				0	0	0	0	0	0	0	0	0	0	0	0	0	0	0	0	0		0
espr_0538	541	0	2020-05-11	1496	1	3	3	0	1	0	SI	10/20/2020	NO	0	0	26	1	SI	Peru	TUMBES	TUMBES	TUMBES	Mestizo		NO		NO				0	0	0	0	0	0	0	0	0	0	0	0	0	0	0	0	0		0
espr_0539	542	2	2020-05-11	1490	1	9	6	0	1	0	SI	10/20/2020	SI	0	2	49	1	NO	Peru	TUMBES	TUMBES	TUMBES	Mestizo		NO		NO				0	0	0	0	0	0	0	0	0	0	0	0	0	0	0	0	0		0
espr_0540	543	3	2020-05-11	1490	1	9	6	0	1	0	SI	10/20/2020	SI	0	2	41	0	NO	Peru	TUMBES	TUMBES	TUMBES	Mestizo		NO		NO				0	0	0	0	0	0	0	0	0	0	0	0	0	0	0	0	0		0
espr_0541	544	4	2020-05-11	1490	1	9	6	0	1	0	SI	10/20/2020	SI	0
espr_0542	545	0	2020-05-11	1490	1	9	6	0	1	0	SI	10/20/2020	SI	0	0	20	0	NO	Peru	TUMBES	TUMBES	TUMBES	Mestizo		NO		NO				0	0	0	0	0	0	0	0	0	0	0	0	0	0	0	0	0		0
espr_0543	546	4	2020-05-11	1490	1	9	6	0	1	0	SI	10/20/2020	SI	0
espr_0544	547	2	2020-05-11	1490	1	9	6	0	1	0	SI	10/20/2020	SI	0	2	13	1	NO	Peru	TUMBES	TUMBES	TUMBES	Mestizo		NO		NO				0	0	0	0	0	0	0	0	0	0	0	0	0	0	0	0	0		0
espr_0545	548	3	2020-05-11	1490	1	9	6	0	1	0	SI	10/20/2020	SI	0	2	7	0	NO	Peru	TUMBES	TUMBES	TUMBES	Mestizo		NO		NO				0	0	0	0	0	0	0	0	0	0	0	0	0	0	0	0	0		0
espr_0546	549	0	2020-05-11	1490	1	9	6	0	1	0	SI	10/20/2020	SI	0	0	4	0	NO	Peru	TUMBES	TUMBES	TUMBES	Mestizo		NO		NO				0	0	0	0	0	0	0	0	0	0	0	0	0	0	0	0	0		0
espr_0547	550	3	2020-05-11	1490	1	9	6	0	1	0	SI	10/20/2020	SI	0	2	2	0	NO	Peru	TUMBES	TUMBES	TUMBES	Mestizo		NO		NO				0	0	0	0	0	0	0	0	0	0	0	0	0	0	0	0	0		0
espr_0548	551	4	2020-05-11	1514	1	3	3	0	1	0	SI	10/20/2020	SI	2
espr_0549	552	0	2020-05-11	1514	1	3	3	0	1	0	SI	10/20/2020	SI	2	1	16	0	NO	Peru	TUMBES	TUMBES	TUMBES	Mestizo	11/17/2020	NO		NO				0	0	0	1	0	0	0	0	0	0	0	0	0	0	0	0	0		0
espr_0550	553	4	2020-05-11	1514	1	3	3	0	1	0	SI	10/20/2020	SI	2
espr_0551	554	0	2020-05-11	1532	1	3	2	0	1	0	SI	10/15/2020	NO	3	0	41	0	NO	Peru	TUMBES	TUMBES	TUMBES	Mestizo		NO		NO				0	0	0	0	0	0	0	0	0	0	0	0	0	0	0	0	0		0
espr_0552	555	0	2020-05-11	1532	1	3	2	0	1	0	SI	10/15/2020	NO	3	0	10	1	NO	Peru	TUMBES	TUMBES	TUMBES	Mestizo		NO		NO				0	0	0	0	0	0	0	0	0	0	0	0	0	0	0	0	0		0
espr_0553	556	0	2020-05-11	1532	1	3	2	0	1	0	SI	10/15/2020	NO	3	0	8	1	NO	Peru	TUMBES	TUMBES	TUMBES	Mestizo		NO		NO				0	0	0	0	0	0	0	0	0	0	0	0	0	0	0	0	0		0
espr_0554	557	0	2020-05-11	1577	1	4	2	0	1	0	SI	10/15/2020	SI	0	0	32	1	NO	Peru	TUMBES	TUMBES	TUMBES	Mestizo		NO		NO				0	0	0	0	0	0	0	0	0	0	0	0	0	0					0
espr_0555	558	0	2020-05-11	1577	1	4	2	0	1	0	SI	10/15/2020	SI	0	0	30	0	NO	Peru	TUMBES	TUMBES	TUMBES	Mestizo		NO		NO				0	0	0	0	0	0	0	0	0	0	0	0	0	0	0	0	0		0
espr_0556	559	0	2020-05-11	1577	1	4	2	0	1	0	SI	10/15/2020	SI	0	0	8	1	NO	Peru	TUMBES	TUMBES	TUMBES	Mestizo		NO		NO				0	0	0	0	0	0	0	0	0	0	0	0	0	0	0	0	0		0
espr_0557	560	0	2020-05-11	1577	1	4	2	0	1	0	SI	10/15/2020	SI	0	0	2	0	NO	Peru	TUMBES	TUMBES	TUMBES	Mestizo		NO		NO				0	0	0	0	0	0	0	0	0	0	0	0	0	0	0	0	0		0
espr_0558	561	0	2020-05-11	1669	1	4	2	0	1	0	NO		SI	0	0	24	1	NO	Peru	TUMBES	TUMBES	TUMBES	Mestizo		NO		NO				0	0	0	0	0	0	0	0	0	0	0	0	0	0	0	0	0		0
espr_0559	562	0	2020-05-11	1669	1	4	2	0	1	0	NO		SI	0	0	20	0	NO	Peru	TUMBES	TUMBES	TUMBES	Mestizo		NO		NO				0	0	0	0	0	0	0	0	0	0	0	0	0	0	0	0	0		0
espr_0560	563	0	2020-05-11	1669	1	4	2	0	1	0	NO		SI	0	0	4	0	NO	Peru	TUMBES	TUMBES	TUMBES	Mestizo		NO		NO				0	0	0	0	0	0	0	0	0	0	0	0	0	0	0	0	0		0
espr_0561	564	4	2020-05-11	1669	1	4	2	0	1	0	NO		SI	0
espr_0562	565	3	2020-05-11	1533	1	4	5	0	1	0	NO		SI	0	2	34	1	NO	Peru	TUMBES	TUMBES	TUMBES	Mestizo		NO		NO				0	0	0	0	0	0	0	0	0	0	0	0	0	0	0	0	0		0
espr_0563	566	0	2020-05-11	1533	1	4	5	0	1	0	NO		SI	0	2	33	0	NO	Peru	LAMBAYEQUE	CHICLAYO	SANTA ROSA	Mestizo		NO		NO				0	0	0	0	0	0	0	0	0	0	0	0	0	0	0	0	0		0
espr_0564	567	3	2020-05-11	1533	1	4	5	0	1	0	NO		SI	0	2	15	1	NO	Peru	TUMBES	TUMBES	TUMBES			NO		NO				0	0	0	0	0	0	0	0	0	0	0	0	0	0	0	0	0		0
espr_0565	568	3	2020-05-11	1533	1	4	5	0	1	0	NO		SI	0	2	9	1	NO	Peru	TUMBES	TUMBES	TUMBES	Mestizo		NO		NO				0	0	0	0	0	0	0	0	0	0	0	0	0	0	0	0	0		0
espr_0566	569	4	2020-05-11	284	1	2	3	0	1	0	NO		SI	0
espr_0567	570	4	2020-05-11	284	1	1	1	0	1	0	NO		NO	0
espr_0568	571	4	2020-05-11	284	1	1	1	0	1	0	NO		NO	0
espr_0569	572	0	2020-06-11	379	1	3	1	0	1	0	NO		NO	0	0	50	1	NO	Peru	TUMBES	TUMBES	TUMBES	Mestizo		NO		NO				0	0	0	0	0	0	0	0	0	0	0	0	0	0	0	0	0		0
espr_0570	573	4	2020-06-11	379	1	3	1	0	1	0	NO		NO	0
espr_0571	574	4	2020-06-11	379	1	3	1	0	1	0	NO		NO	0
espr_0572	575	4	2020-06-11	187	1	5	3	0	1	0	SI	10/15/2020	NO	0
espr_0573	576	0	2020-06-11	187	1	5	3	0	1	0	SI	10/15/2020	NO	0	1	39	0	NO	Peru	TUMBES	TUMBES	TUMBES	Mestizo	11/17/2020	NO		NO				0	0	0	1	0	0	0	0	0	0	0	0	0	0	0	0	0		0
espr_0574	577	4	2020-06-11	187	1	5	3	0	1	0	SI	10/15/2020	NO	0
espr_0575	578	4	2020-06-11	187	1	5	3	0	1	0	SI	10/15/2020	NO	0
espr_0576	579	4	2020-06-11	187	1	5	3	0	1	0	SI	10/15/2020	NO	0
espr_0577	580	0	10/29/2020	314	1	5	4	0	1	0	SI	10/20/2020	SI	0	0	48	1	NO	Peru	TUMBES	TUMBES	TUMBES	Mestizo		NO		NO				0	0	0	0	0	0	0	0	0	0	0	0	0	0	0	0	0		0
espr_0578	581	0	10/29/2020	314	1	5	4	0	1	0	SI	10/20/2020	SI	0	0	46	0	NO	Peru	TUMBES	TUMBES	TUMBES	Mestizo		NO		NO				0	0	0	0	0	0	0	0	0	0	0	0	0	0	0	0	0		0
espr_0579	582	0	10/29/2020	314	1	5	4	0	1	0	SI	10/20/2020	SI	0	0	14	0	NO	Peru	TUMBES	TUMBES	TUMBES	Mestizo		NO		NO				0	0	0	0	0	0	0	0	0	0	0	0	0	0	0	0	0		0
espr_0580	583	0	10/29/2020	314	1	5	4	0	1	0	SI	10/20/2020	SI	0	0	8	0	NO	Peru	TUMBES	TUMBES	TUMBES	Mestizo		NO		NO				0	0	0	0	0	0	0	0	0	0	0	0	0	0	0	0	0		0
espr_0581	584	3	10/29/2020	314	1	5	4	0	1	0	SI	10/20/2020	SI	0	2	6	1	NO	Peru	TUMBES	TUMBES	TUMBES	Mestizo		NO		NO				0	0	0	0	0	0	0	0	0	0	0	0	0	0	0	0	0		0
espr_0582	585	0	10/29/2020	281	1	5	4	0	1	0	NO		SI	0	0	29	1	NO	Peru	TUMBES	TUMBES	TUMBES	Mestizo		NO		NO				0	0	0	0	0	0	0	0	0	0	0	0	0	0	0	0	0		0
espr_0583	586	3	10/29/2020	281	1	5	4	0	1	0	NO		SI	0	2	27	0	NO	Peru	TUMBES	TUMBES	TUMBES	Mestizo		NO		NO				0	0	0	0	0	0	0	0	0	0	0	0	0	0	0	0	0		0
espr_0584	587	3	10/29/2020	281	1	5	4	0	1	0	NO		SI	0	2	4	1	NO	Peru	TUMBES	TUMBES	TUMBES	Mestizo		NO		NO				0	0	0	0	0	0	0	0	0	0	0	0	0	0	0	0	0		0
espr_0585	588	3	10/29/2020	281	1	5	4	0	1	0	NO		SI	0	2	8	0	NO	Peru	TUMBES	TUMBES	TUMBES	Mestizo		NO		NO				0	0	0	0	0	0	0	0	0	0	0	0	0	0	0	0	0		0
espr_0586	589	3	10/29/2020	281	1	5	4	0	1	0	NO		SI	0	2	49	0	NO	Peru	TUMBES	TUMBES	TUMBES	Mestizo		NO		NO				0	0	0	0	0	0	0	0	0	0	0	0	0	0	0	0	0		0
espr_0587	590	3	10/29/2020	339	1	4	5	0	1	0	NO		SI	0	2	35	0	NO	Peru	TUMBES	TUMBES	TUMBES	Mestizo		NO		NO				0	0	0	0	0	0	0	0	0	0	0	0	0	0					0
espr_0588	591	0	10/29/2020	339	1	4	5	0	1	0	NO		SI	0	0	16	1	NO	Peru	TUMBES	TUMBES	TUMBES	Mestizo		NO		NO				0	0	0	0	0	0	0	0	0	0	0	0	0	0	0	0	0		0
espr_0589	592	3	10/29/2020	339	1	4	5	0	1	0	NO		SI	0	2	15	1	NO	Peru	TUMBES	TUMBES	TUMBES	Mestizo		NO		NO				0	0	0	0	0	0	0	0	0	0	0	0	0	0					0
espr_0590	593	3	10/29/2020	339	1	4	5	0	1	0	NO		SI	0	2	11	1	NO	Peru	TUMBES	TUMBES	TUMBES	Mestizo		NO		NO				0	0	0	0	0	0	0	0	0	0	0	0	0	0					0
espr_0591	594	0	10/29/2020	246	1	3	4	0	1	0	SI	10/20/2020	SI	0	0	31	1	NO	Peru	TUMBES	TUMBES	TUMBES	Mestizo		NO		NO				0	0	0	0	0	0	0	0	0	0	0	0	0	0	0	0	0		0
espr_0592	595	0	10/29/2020	246	1	3	4	0	1	0	SI	10/20/2020	SI	0	0	27	0	NO	Peru	TUMBES	TUMBES	TUMBES	Mestizo		NO		NO				0	0	0	0	0	0	0	0	0	0	0	0	0	0	0	0	0		0
espr_0593	596	0	10/29/2020	246	1	3	4	0	1	0	SI	10/20/2020	SI	0	0	6	1	NO	Peru	TUMBES	TUMBES	TUMBES	Mestizo		NO		NO				0	0	0	0	0	0	0	0	0	0	0	0	0	0	0	0	0		0
espr_0594	597	0	10/29/2020	168	1	1	5	0	1	0	SI	10/25/2020	SI	0	1	53	0	NO	Peru	TUMBES	TUMBES	TUMBES	Mestizo	11/17/2020	NO		NO				0	0	0	1	0	0	0	0	0	0	0	0	0	0	0	0	0		0
espr_0595	598	0	10/31/2020	1808	1	5	6	0	1	0	SI	10/20/2020	SI	0	0	42	1	NO	Peru	TUMBES	TUMBES	TUMBES	Mestizo		NO		NO				0	0	0	0	0	0	0	0	0	0	0	0	0	0					0
espr_0596	599	4	10/31/2020	1808	1	5	6	0	1	0	SI	10/20/2020	SI	0
espr_0597	600	4	10/31/2020	1808	1	5	6	0	1	0	SI	10/20/2020	SI	0
espr_0598	601	4	10/31/2020	1808	1	5	6	0	1	0	SI	10/20/2020	SI	0
espr_0599	602	4	10/31/2020	1808	1	5	6	0	1	0	SI	10/20/2020	SI	0
espr_0600	603	0	10/31/2020	1796	1	4	5	0	1	0	SI	10/20/2020	SI	0	0	37	1	NO	Peru	TUMBES	TUMBES	TUMBES	Otro		NO		NO				0	0	0	0	0	0	0	0	0	0	0	0	0	0	0	0	0		0
espr_0601	604	0	10/31/2020	1796	1	4	5	0	1	0	SI	10/20/2020	SI	0	0	41	0	NO	Peru	TUMBES	TUMBES	TUMBES	Mestizo		NO		NO				0	0	0	0	0	0	0	0	0	0	0	0	0	0					0
espr_0602	605	0	10/31/2020	1796	1	4	5	0	1	0	SI	10/20/2020	SI	0	0	11	0	NO	Peru	TUMBES	TUMBES	TUMBES	Mestizo		NO		NO				0	0	0	0	0	0	0	0	0	0	0	0	0	0					0
espr_0603	606	0	10/31/2020	1796	1	4	5	0	1	0	SI	10/20/2020	SI	0	0	4	1	NO	Peru	TUMBES	TUMBES	TUMBES	Mestizo		NO		NO				0	0	0	0	0	0	0	0	0	0	0	0	0	0					0
espr_0604	607	2	10/31/2020	1703	1	3	4	0	1	0	NO		SI	0	2	27	1	SI	Peru	TUMBES	TUMBES	TUMBES	Mestizo		NO		NO				0	0	0	0	0	0	0	0	0	0	0	0	0	0	0	0	0		0
espr_0605	608	2	10/31/2020	1703	1	3	4	0	1	0	NO		SI	0	2	26	0	SI	Peru	TUMBES	TUMBES	TUMBES	Mestizo	11/18/2020	NO		NO				0	0	0	1	0	0	0	0	0	0	0	0	0	0	0	0	0		0
espr_0606	609	4	10/31/2020	1703	1	3	4	0	1	0	NO		SI	0
espr_0607	610	4	10/31/2020	1462	1	3	1	0	1	0	SI	10/20/2020	SI	2
espr_0608	611	3	10/31/2020	1462	1	3	1	0	1	0	SI	10/20/2020	SI	2	2	23	0		Peru	TUMBES	TUMBES	TUMBES	Mestizo	11/19/2020	NO		NO				0	0	1	0	0	0	0	0	0	0	0	0	0	0	0	0	0		0
espr_0609	612	4	10/31/2020	1462	1	3	1	0	1	0	SI	10/20/2020	SI	2
espr_0610	613	4	10/31/2020	1430	1	4	2	0	1	0	SI	10/20/2020	NO	2
espr_0611	614	4	10/31/2020	1430	1	4	2	0	1	0	SI	10/20/2020	NO	2
espr_0612	615	3	10/31/2020	1430	1	4	2	0	1	0	SI	10/20/2020	NO	2	2	10	1	NO	Peru	TUMBES	TUMBES	TUMBES	Mestizo		NO		NO				0	0	0	0	0	0	0	0	0	0	0	0	0	0	0	0	0		0
espr_0613	616	4	10/31/2020	1430	1	4	2	0	1	0	SI	10/20/2020	NO	2
espr_0614	617	4	10/29/2020	271	1	1	2	0	1	0	SI	10/26/2020	NO	0
espr_0615	618	0	10/29/2020	304	1	5	2	0	1	0	SI	10/26/2020	NO	0	0	31	1	NO	Peru	TUMBES	TUMBES	TUMBES	Mestizo		NO		NO				0	0	0	0	0	0	0	0	0	0	0	0	0	0	0	0	0		0
espr_0616	619	0	10/29/2020	304	1	5	2	0	1	0	SI	10/26/2020	NO	0	0	31	0	NO	Peru	TUMBES	TUMBES	TUMBES	Mestizo		NO		NO				0	0	0	0	0	0	0	0	0	0	0	0	0	0	0	0	0		0
espr_0617	620	0	10/29/2020	304	1	5	2	0	1	0	SI	10/26/2020	NO	0	0	12	0	NO	Peru	TUMBES	TUMBES	TUMBES	Mestizo		NO		NO				0	0	0	0	0	0	0	0	0	0	0	0	0	0	0	0	0		0
espr_0618	621	0	10/29/2020	304	1	5	2	0	1	0	SI	10/26/2020	NO	0	0	11	1	NO	Peru	TUMBES	TUMBES	TUMBES	Mestizo		NO		NO				0	0	0	0	0	0	0	0	0	0	0	0	0	0	0	0	0		0
espr_0619	622	4	10/29/2020	304	1	5	2	0	1	0	SI	10/26/2020	NO	0
espr_0620	623	4	10/29/2020	240	1	1	2	0	1	0	SI	10/26/2020	NO	0
espr_0621	624	1	10/31/2020	1712	1	7	4	0	1	0	NO		NO	2	2	33	1	NO	Peru	TUMBES	TUMBES	TUMBES	Mestizo		NO		NO				0	0	0	0	0	0	0	0	0	0	0	0	0	0	0	0	0		0
espr_0622	625	0	10/31/2020	1712	1	7	4	0	1	0	NO		NO	2	0	31	0	NO	Peru	TUMBES	TUMBES	TUMBES	Mestizo		NO		NO				0	0	0	0	0	0	0	0	0	0	0	0	0	0					0
espr_0623	626	0	10/31/2020	1712	1	7	4	0	1	0	NO		NO	2	0	14	0	NO	Peru	TUMBES	TUMBES	TUMBES	Mestizo		NO		NO				0	0	0	0	0	0	0	0	0	0	0	0	0	0					0
espr_0624	627	0	10/31/2020	1712	1	7	4	0	1	0	NO		NO	2	1	10	0	NO	Peru	TUMBES	TUMBES	TUMBES	Mestizo	11/18/2020	NO		NO				0	0	0	1	0	0	0	0	0	0	0	0	0	0	0	0	0		0
espr_0625	628	0	10/31/2020	1712	1	7	4	0	1	0	NO		NO	2	0	7	0	NO	Peru	TUMBES	TUMBES	TUMBES	Mestizo		NO		NO				0	0	0	0	0	0	0	0	0	0	0	0	0	0					0
espr_0626	629	0	10/31/2020	1712	1	7	4	0	1	0	NO		NO	2	0	5	0	NO	Peru	TUMBES	TUMBES	TUMBES	Mestizo		NO		NO				0	0	0	0	0	0	0	0	0	0	0	0	0	0					0
espr_0627	630	0	10/31/2020	1712	1	7	4	0	1	0	NO		NO	2	0	3	0	NO	Peru	TUMBES	TUMBES	TUMBES	Mestizo		NO		NO				0	0	0	0	0	0	0	0	0	0	0	0	0	0					0
espr_0628	631	0	10/31/2020	1805	1	5	3	0	1	0	NO		SI	2	0	25	1	NO	Peru	TUMBES	TUMBES	TUMBES	Mestizo		NO		NO				0	0	0	0	0	0	0	0	0	0	0	0	0	0	0	0	0		0
espr_0629	632	2	10/31/2020	1805	1	5	3	0	1	0	NO		SI	2	2	66	0	NO	Peru	TUMBES	TUMBES	TUMBES	Mestizo		NO		NO				0	0	0	0	0	0	0	0	0	0	0	0	0	0	0	0	0		0
espr_0629	633	3	10/31/2020	1805	1	5	3	0	1	0	NO		SI	2	2	23	0		Peru	TUMBES	TUMBES	TUMBES	Mestizo		NO		NO				0	0	0	0	0	0	0	0	0	0	0	0	0	0	0	0	0		0
espr_0630	634	4	10/31/2020	1805	1	5	3	0	1	0	NO		SI	2
espr_0631	635	4	10/31/2020	1805	1	5	3	0	1	0	NO		SI	2
espr_0632	636	4	10/31/2020	1805	1	5	3	0	1	0	NO		SI	2
espr_0633	637	0	10/29/2020	353	1	2	3	0	1	0	SI	10/13/2020	SI	0	0	52	1	NO	Peru	TUMBES	TUMBES	TUMBES	Mestizo		NO		NO				0	0	0	0	0	0	0	0	0	0	0	0	0	0					0
espr_0634	638	4	10/29/2020	353	1	2	3	0	1	0	SI	10/13/2020	SI	0
espr_0635	639	3	10/29/2020	325	1	6	3	0	1	0	SI	10/23/2020	SI	0	2	46	1		Peru	TUMBES	TUMBES	TUMBES	Mestizo		NO		NO				0	0	0	0	0	0	0	0	0	0	0	0	0	0	0	0	0		0
espr_0636	640	3	10/29/2020	325	1	6	3	0	1	0	SI	10/23/2020	SI	0	2	47	0	NO	Peru	TUMBES	TUMBES	TUMBES	Mestizo		NO		NO				0	0	0	0	0	0	0	0	0	0	0	0	0	0	0	0	0		0
espr_0637	641	0	10/29/2020	325	1	6	3	0	1	0	SI	10/23/2020	SI	0	0	15	0	NO	Peru	TUMBES	TUMBES	TUMBES	Mestizo		NO		NO				0	0	0	0	0	0	0	0	0	0	0	0	0	0	0	0	0		0
espr_0638	642	3	10/29/2020	325	1	6	3	0	1	0	SI	10/23/2020	SI	0	2	20	0	NO	Peru	TUMBES	TUMBES	TUMBES	Mestizo		NO		NO				0	0	0	0	0	0	0	0	0	0	0	0	0	0	0	0	0		0
espr_0639	643	4	10/29/2020	325	1	6	3	0	1	0	SI	10/23/2020	SI	0
espr_0640	644	4	10/29/2020	325	1	6	3	0	1	0	SI	10/23/2020	SI	0
espr_0641	645	4	10/29/2020	188	1	3	3	0	1	0	SI	10/23/2020	SI	0
espr_0642	646	4	10/29/2020	188	1	3	3	0	1	0	SI	10/23/2020	SI	0
espr_0643	647	4	10/29/2020	188	1	3	3	0	1	0	SI	10/23/2020	SI	0
espr_0644	648	4	10/31/2020	1461	1	3	1	0	1	0	SI	10/15/2020	SI	3
espr_0645	649	4	10/31/2020	1461	1	3	1	0	1	0	SI	10/15/2020	SI	3
espr_0646	650	4	10/31/2020	1461	1	3	1	0	1	0	SI	10/15/2020	SI	3
espr_0647	651	0	10/29/2020	179	2	9	7	0	1	0	SI	10/15/2020	SI	0	0	61	1	NO	Peru	TUMBES	TUMBES	TUMBES	Mestizo		NO		NO				0	0	0	0	0	0	0	0	0	0	0	0	0	0	0	0	0		0
espr_0648	652	0	10/29/2020	179	2	9	7	0	1	0	SI	10/15/2020	SI	0	0	56	0	NO	Peru	TUMBES	TUMBES	TUMBES	Mestizo		NO		NO				0	0	0	0	0	0	0	0	0	0	0	0	0	0	0	0	0		0
espr_0649	653	0	10/29/2020	179	2	9	7	0	1	0	SI	10/15/2020	SI	0	0	30	0	NO	Peru	TUMBES	TUMBES	TUMBES	Mestizo		NO		NO				0	0	0	0	0	0	0	0	0	0	0	0	0	0	0	0	0		0
espr_0650	654	4	10/29/2020	179	2	9	7	0	1	0	SI	10/15/2020	SI	0
espr_0651	655	4	10/29/2020	179	2	9	7	0	1	0	SI	10/15/2020	SI	0
espr_0652	656	0	10/29/2020	179	2	9	7	0	1	0	SI	10/15/2020	SI	0	0	12	1	NO	Peru	TUMBES	TUMBES	TUMBES	Mestizo		NO		NO				0	0	0	0	0	0	0	0	0	0	0	0	0	0	0	0	0		0
espr_0653	657	0	10/29/2020	179	2	9	7	0	1	0	SI	10/15/2020	SI	0	0	6	1	NO	Peru	TUMBES	TUMBES	TUMBES	Mestizo		NO		NO				0	0	0	0	0	0	0	0	0	0	0	0	0	0	0	0	0		0
espr_0654	658	4	10/29/2020	179	2	9	7	0	1	0	SI	10/15/2020	SI	0
espr_0655	659	4	10/29/2020	179	2	9	7	0	1	0	SI	10/15/2020	SI	0
espr_0656	660	4	10/29/2020	179	2	9	7	0	1	0	SI	10/15/2020	SI	0
espr_0657	661	4	10/29/2020	179	2	9	7	0	1	0	SI	10/15/2020	SI	0
espr_0658	662	4	10/29/2020	179	2	9	7	0	1	0	SI	10/15/2020	SI	0
espr_0659	663	0	10/29/2020	179	2	9	7	0	1	0	SI	10/15/2020	SI	0	0	14	1	NO	Peru	TUMBES	TUMBES	TUMBES	Mestizo	11/17/2020	NO		NO				1	1	0	0	0	0	1	0	0	0	0	0	0	0	0	0	0		0
espr_0660	664	4	10/29/2020	179	2	9	7	0	1	0	SI	10/15/2020	SI	0
espr_0661	665	4	10/29/2020	179	2	9	7	0	1	0	SI	10/15/2020	SI	0
espr_0662	666	4	10/29/2020	371	1	5	3	0	1	0	SI	10/15/2020	SI	0
espr_0663	667	3	10/29/2020	371	1	5	3	0	1	0	SI	10/15/2020	SI	0	2	39	0
espr_0664	668	3	10/29/2020	371	1	5	3	0	1	0	SI	10/15/2020	SI	0	2	7	1
espr_0665	669	4	10/29/2020	371	1	5	3	0	1	0	SI	10/15/2020	SI	0
espr_0666	670	4	10/29/2020	371	1	5	3	0	1	0	SI	10/15/2020	SI	0
espr_0667	671	4	10/29/2020	277	1	6	5	0	1	0	NO		SI	0
espr_0668	672	0	10/29/2020	277	1	6	5	0	1	0	NO		SI	0	2	22	1	NO	Peru	TUMBES	TUMBES	TUMBES	Mestizo	7/31/2020	NO		NO				0	0	1	1	1	1	1	1	0	0	0	0	0	0	0	0	0		0
espr_0669	673	3	10/29/2020	277	1	6	5	0	1	0	NO		SI	0	2	16	1	NO	Peru	TUMBES	TUMBES	TUMBES	Mestizo		NO		NO				0	0	0	0	0	0	0	0	0	0	0	0	0	0	0	0	0		0
espr_0670	674	3	10/29/2020	277	1	6	5	0	1	0	NO		SI	0	2	8	0	NO	Peru	TUMBES	TUMBES	TUMBES	Mestizo		NO		NO				0	0	0	0	0	0	0	0	0	0	0	0	0	0	0	0	0		0
espr_0671	675	4	10/29/2020	277	1	6	5	0	1	0	NO		SI	0
espr_0672	676	0	10/29/2020	277	1	6	5	0	1	0	NO		SI	0	0	2	1	NO	Peru	TUMBES	TUMBES	TUMBES	Mestizo		NO		NO				0	0	0	0	0	0	0	0	0	0	0	0	0	0	0	0	0		0
espr_0673	677	4	10/29/2020	183	1	2	2	0	1	0	NO		SI	0
espr_0674	678	4	10/29/2020	183	1	2	2	0	1	0	NO		SI	0
espr_0675	679	2	10/31/2020	1457	1	1	3	0	1	0	NO		NO	2	1	73	1	SI	Peru	TUMBES	TUMBES	TUMBES	Mestizo	11/17/2020	NO		NO				0	0	0	1	0	0	0	0	0	0	0	0	0	0	0	0	0
espr_0676	680	0	10/30/2020	387	1	5	4	0	1	0	SI	10/15/2020	SI	0	0	35	1	NO	Peru	TUMBES	TUMBES	TUMBES	Mestizo		NO		NO				0	0	0	0	0	0	0	0	0	0	0	0	0	0	0	0	0		0
espr_0677	681	0	10/30/2020	387	1	5	4	0	1	0	SI	10/15/2020	SI	0	0	39	0	NO	Peru	TUMBES	TUMBES	TUMBES	Mestizo		NO		NO				0	0	0	0	0	0	0	0	0	0	0	0	0	0	0	0	0		0
espr_0678	682	0	10/30/2020	387	1	5	4	0	1	0	SI	10/15/2020	SI	0	0	15	1	NO	Peru	TUMBES	TUMBES	TUMBES	Mestizo		NO		NO				0	0	0	0	0	0	0	0	0	0	0	0	0	0	0	0	0		0
espr_0679	683	0	10/30/2020	387	1	5	4	0	1	0	SI	10/15/2020	SI	0	0	13	1	NO	Peru	TUMBES	TUMBES	TUMBES	Mestizo		NO		NO				0	0	0	0	0	0	0	0	0	0	0	0	0	0	0	0	0		0
espr_0680	684	4	10/30/2020	387	1	5	4	0	1	0	SI	10/15/2020	SI	0
espr_0681	685	4	10/29/2020	356	1	3	3	0	1	0	NO		SI	0
espr_0682	686	0	10/29/2020	356	1	3	3	0	1	0	NO		SI	0	0	20	0	NO	Peru	TUMBES	TUMBES	TUMBES	Mestizo		NO		NO				0	0	0	0	0	0	0	0	0	0	0	0	0	0					0
espr_0683	687	0	10/29/2020	356	1	3	3	0	1	0	NO		SI	0	0	4	1	NO	Peru	TUMBES	TUMBES	TUMBES	Mestizo		NO		NO				0	0	0	0	0	0	0	0	0	0	0	0	0	0					0
espr_0684	688	4	10/29/2020	270	1	3	3	0	1	0	NO		NO	0
espr_0685	689	0	10/29/2020	270	1	3	3	0	1	0	NO		NO	0	1	26	1	SI	Peru	TUMBES	TUMBES	TUMBES	Mestizo	11/17/2020	NO		NO				0	0	0	1	0	0	0	0	0	0	0	0	0	0	0	0	0	0	0
espr_0686	690	4	10/29/2020	270	1	3	3	0	1	0	NO		NO	0
espr_0687	691	4	10/29/2020	219	1	4	3	0	1	0	SI	10/15/2020	SI	0
espr_0688	692	0	10/29/2020	219	1	4	3	0	1	0	SI	10/15/2020	SI	0	1	18	0	NO	Peru	TUMBES	TUMBES	TUMBES	Mestizo	11/17/2020	NO		NO				0	0	0	1	0	0	0	0	0	0	0	0	0	0	0	0	0		0
espr_0689	693	4	10/29/2020	219	1	4	3	0	1	0	SI	10/15/2020	SI	0
espr_0690	694	4	10/29/2020	219	1	4	3	0	1	0	SI	10/15/2020	SI	0
espr_0691	695	4	10/31/2020	1465	1	4	4	0	1	0	SI	2020-03-01	SI	2
espr_0692	696	0	10/31/2020	1465	1	4	4	0	1	0	SI	2020-03-01	SI	2	1	34	0	NO	Peru	TUMBES	TUMBES	TUMBES	Mestizo	11/17/2020	NO		NO				0	0	0	1	0	0	0	0	0	0	0	0	0	0	0	0	0		0
espr_0693	697	4	10/31/2020	1465	1	4	4	0	1	0	SI	2020-03-01	SI	2
espr_0694	698	3	10/31/2020	1465	1	4	4	0	1	0	SI	2020-03-01	SI	2	2	2	0
espr_0695	699	0	10/29/2020	223	1	6	4	0	1	0	SI	10/15/2020	SI	0	1	51	0	NO	Peru	TUMBES	TUMBES	TUMBES	Mestizo	2021-03-02	NO		NO				0	1	1	1	0	0	0	0	0	0	0	0	0	0	0	0	0		0
espr_0696	700	4	10/29/2020	223	1	6	4	0	1	0	SI	10/15/2020	SI	0
espr_0697	701	0	10/29/2020	223	1	6	4	0	1	0	SI	10/15/2020	SI	0	0	29	0	NO	Peru	TUMBES	TUMBES	TUMBES	Mestizo		NO		NO				0	0	0	0	0	0	0	0	0	0	0	0	0	0	0	0	0		0
espr_0698	702	4	10/29/2020	223	1	6	4	0	1	0	SI	10/15/2020	SI	0
espr_0699	703	4	10/29/2020	223	1	6	4	0	1	0	SI	10/15/2020	SI	0
espr_0700	704	4	10/29/2020	223	1	6	4	0	1	0	SI	10/15/2020	SI	0
espr_0701	705	0	10/29/2020	309	1	2	3	0	1	0	SI	10/15/2020	SI	0	0	66	1	NO	Peru	TUMBES	TUMBES	TUMBES	Mestizo		NO		NO				0	0	0	0	0	0	0	0	0	0	0	0	0	0	0	0	0		0
espr_0702	706	0	10/29/2020	309	1	2	3	0	1	0	SI	10/15/2020	SI	0	0	57	0	NO	Peru	TUMBES	TUMBES	TUMBES	Mestizo		NO		NO				0	0	0	0	0	0	0	0	0	0	0	0	0	0	0	0	0		0
espr_0703	707	4	10/29/2020	259	1	3	4	0	1	0	SI	10/15/2020	SI	0
espr_0704	708	4	10/29/2020	259	1	3	4	0	1	0	SI	10/15/2020	SI	0
espr_0705	709	4	10/29/2020	259	1	3	4	0	1	0	SI	10/15/2020	SI	0
espr_0706	710	4	10/29/2020	254	1	6	4	0	0	0	NO		SI	0
espr_0707	711	3	10/29/2020	254	1	6	4	0	0	0	NO		SI	0	2	29	0		Peru	TUMBES	TUMBES	TUMBES	Mestizo	9/28/2020	NO		NO				0	0	1	0	0	0	0	0	0	0	0	0	0	0	0	0	0		0
espr_0708	712	4	10/29/2020	254	1	6	4	0	0	0	NO		SI	0
espr_0709	713	4	10/29/2020	254	1	6	4	0	0	0	NO		SI	0
espr_0710	714	4	10/29/2020	254	1	6	4	0	0	0	NO		SI	0
espr_0711	715	0	10/29/2020	254	1	6	4	0	0	0	NO		SI	0	0	30	1	NO	Peru	TUMBES	TUMBES	TUMBES			NO		NO				0	0	0	0	0	0	0	0	0	0	0	0	0	0	0	0	0		0
espr_0712	716	0	10/31/2020	1475	1	4	2	0	1	0	SI	10/20/2020	NO	2	0	30	1	NO	Peru	TUMBES	TUMBES	TUMBES	Mestizo		NO		NO				0	0	0	0	0	0	0	0	0	0	0	0	0	0					0
espr_0713	717	2	10/31/2020	1475	1	4	2	0	1	0	SI	10/20/2020	NO	2	2	31	0	NO	Peru	TUMBES	TUMBES	TUMBES	Mestizo		NO		NO				0	0	0	0	0	0	0	0	0	0	0	0	0	0	0	0	0		0
espr_0714	718	3	10/31/2020	1475	1	4	2	0	1	0	SI	10/20/2020	NO	2	2	12	1	NO	Peru	TUMBES	TUMBES	TUMBES	Mestizo		NO		NO				0	0	0	0	0	0	0	0	0	0	0	0	0	0	0	0	0		0
espr_0715	719	3	10/31/2020	1475	1	4	2	0	1	0	SI	10/20/2020	NO	2	2	7	0	NO	Peru	TUMBES	TUMBES	TUMBES	Mestizo		NO		NO				0	0	0	0	0	0	0	0	0	0	0	0	0	0	0	0	0		0
espr_0716	720	3	10/31/2020	1474	1	2	1	0	0	0	NO		NO	2	2	69	1	NO	Peru	TUMBES	TUMBES	TUMBES	Mestizo		NO		NO				0	0	0	0	0	0	0	0	0	0	0	0	0	0	0	0	0		0
espr_0717	721	0	10/31/2020	1474	1	2	1	0	0	0	NO		NO	2	0	60	0	NO	Peru	TUMBES	TUMBES	TUMBES	Mestizo		NO		NO				0	0	0	0	0	0	0	0	0	0	0	0	0	0	0	0	0		0
espr_0718	722	3	10/31/2020	162	1	3	2	0	1	0	NO		NO	2	2	63	0	NO	Peru	TUMBES	TUMBES	TUMBES	Mestizo		NO		NO				0	0	0	0	0	0	0	0	0	0	0	0	0	0	0	0	0		0
espr_0719	723	0	10/31/2020	162	1	3	2	0	1	0	NO		NO	2	0	13	1	NO	Peru	TUMBES	TUMBES	TUMBES	Mestizo		NO		NO				0	0	0	0	0	0	0	0	0	0	0	0	0	0	0	0	0		0
espr_0720	724	3	10/31/2020	162	1	3	2	0	1	0	NO		NO	2	2	45	0	NO	Peru	TUMBES	TUMBES	TUMBES	Mestizo		NO		NO				0	0	0	0	0	0	0	0	0	0	0	0	0	0	0	0	0		0
espr_0721	725	0	10/31/2020	241	1	1	1	0	1	0	NO		NO	0	0	67	1	NO	Peru	TUMBES	TUMBES	TUMBES	Mestizo		NO		NO				0	0	0	0	0	0	0	0	0	0	0	0	0	0					0
espr_0722	726	0	10/31/2020	244	1	4	2	0	1	0	SI	2019-10-01	SI	0	0	41	1	NO	Peru	TUMBES	TUMBES	TUMBES	Mestizo		NO		NO				0	0	0	0	0	0	0	0	0	0	0	0	0	0	0	0	0		0
espr_0723	727	0	10/31/2020	244	1	4	2	0	1	0	SI	2019-10-01	SI	0	2	46	0	NO	Peru	TUMBES	TUMBES	TUMBES	Mestizo		NO		NO				0	0	0	0	0	0	0	0	0	0	0	0	0	0	0	0	0		0
espr_0724	728	0	10/31/2020	244	1	4	2	0	1	0	SI	2019-10-01	SI	0	0	18	0	NO	Peru	TUMBES	TUMBES	TUMBES	Mestizo		NO		NO				0	0	0	0	0	0	0	0	0	0	0	0	0	0	0	0	0		0
espr_0725	729	0	10/31/2020	244	1	4	2	0	1	0	SI	2019-10-01	SI	0	0	9	0	NO	Peru	TUMBES	TUMBES	TUMBES	Mestizo		NO		NO				0	0	0	0	0	0	0	0	0	0	0	0	0	0	0	0	0		0
espr_0726	730	4	10/31/2020	346	1	3	3	0	1	0	SI	11/19/2020	NO	0
espr_0727	731	4	10/31/2020	346	1	3	3	0	1	0	SI	11/19/2020	NO	0
espr_0728	732	0	10/31/2020	346	1	3	3	0	1	0	SI	11/19/2020	NO	0	0	21	0	NO	Peru	TUMBES	TUMBES	TUMBES	Mestizo		NO		NO				0	0	0	0	0	0	0	0	0	0	0	0	0	0					0
espr_0729	733	0	10/31/2020	352	1	1	1	0	1	0	SI	11/19/2020	SI	0	0	53	1	NO	Peru	TUMBES	TUMBES	TUMBES	Mestizo		NO		NO				0	0	0	0	0	0	0	0	0	0	0	0	0	0					0
espr_0730	734	0	10/31/2020	1502	1	4	3	0	1	0	SI	11/19/2020	SI	0	0	32	1	NO	Peru	TUMBES	TUMBES	TUMBES	Mestizo		NO		NO				0	0	0	0	0	0	0	0	0	0	0	0	0	0	0	0	0		0
espr_0731	735	0	10/31/2020	1502	1	4	3	0	1	0	SI	11/19/2020	SI	0	0	34	0	NO	Peru	TUMBES	TUMBES	TUMBES	Mestizo		NO		NO				0	0	0	0	0	0	0	0	0	0	0	0	0	0	0	0	0		0
espr_0732	736	0	10/31/2020	1502	1	4	3	0	1	0	SI	11/19/2020	SI	0	0	19	0	NO	Peru	TUMBES	TUMBES	TUMBES	Mestizo		NO		NO				0	0	0	0	0	0	0	0	0	0	0	0	0	0	0	0	0		0
espr_0733	737	3	10/31/2020	1574	1	3	4	0	0	0	NO		SI	0	2	42	1	NO	Peru	TUMBES	TUMBES	TUMBES	Mestizo		NO		NO				0	0	0	0	0	0	0	0	0	0	0	0	0	0	0	0	0		0
espr_0734	738	3	10/31/2020	1574	1	3	4	0	0	0	NO		SI	0	0	37	0	NO	Peru	TUMBES	TUMBES	TUMBES	Mestizo		NO		NO				0	0	0	0	0	0	0	0	0	0	0	0	0	0	0	0	0		0
espr_0735	739	3	10/31/2020	1574	1	3	4	0	0	0	NO		SI	0	2	17	1	NO	Peru	TUMBES	TUMBES	TUMBES	Mestizo		NO		NO				0	0	0	0	0	0	0	0	0	0	0	0	0	0	0	0	0		0
espr_0736	740	0	10/31/2020	1575	1	1	2	0	1	0	SI	11/19/2020	SI	0	0	32	1	NO	Peru	TUMBES	TUMBES	TUMBES	Mestizo		NO		NO				0	0	0	0	0	0	0	0	0	0	0	0	0	0	0	0	0		0
espr_0737	741	0	10/31/2020	1579	1	2	3	0	0	0	NO		SI	0	0	37	0	NO	Peru	TUMBES	TUMBES	TUMBES	Mestizo		NO		NO				0	0	0	0	0	0	0	0	0	0	0	0	0	0	0	0	0		0
espr_0738	742	0	10/31/2020	1579	1	2	3	0	0	0	NO		SI	0	0	5	1	NO	Peru	TUMBES	TUMBES	TUMBES	Mestizo		NO		NO				0	0	0	0	0	0	0	0	0	0	0	0	0	0	0	0	0		0
espr_0739	743	0	10/31/2020	1581	1	4	2	0	1	0	NO		SI	2	0	23	1	NO	Peru	TUMBES	TUMBES	TUMBES	Mestizo		NO		NO				0	0	0	0	0	0	0	0	0	0	0	0	0	0					0
espr_0740	744	0	10/31/2020	1581	1	4	2	0	1	0	NO		SI	2	0	27	0	NO	Peru	TUMBES	TUMBES	TUMBES	Mestizo		NO		NO				0	0	0	0	0	0	0	0	0	0	0	0	0	0	0	0	0		0
espr_0741	745	0	10/31/2020	1581	1	4	2	0	1	0	NO		SI	2	0	10	0	NO	Peru	TUMBES	TUMBES	TUMBES	Mestizo		NO		NO				0	0	0	0	0	0	0	0	0	0	0	0	0	0	0	0	0		0
espr_0742	746	4	10/31/2020	1581	1	4	2	0	1	0	NO		SI	2
espr_0743	747	0	10/31/2020	1582	1	5	4	0	1	0	NO		SI	0	0	37	1	NO	Peru	TUMBES	TUMBES	TUMBES	Mestizo		NO		NO				0	0	0	0	0	0	0	0	0	0	0	0	0	0					0
espr_0744	748	0	10/31/2020	1582	1	5	4	0	1	0	NO		SI	0	0	34	0	NO	Peru	TUMBES	TUMBES	TUMBES	Mestizo		NO		NO				0	0	0	0	0	0	0	0	0	0	0	0	0	0	0	0	0		0
espr_0745	749	0	10/31/2020	1582	1	5	4	0	1	0	NO		SI	0	0	9	0	NO	Peru	TUMBES	TUMBES	TUMBES	Mestizo		NO		NO				0	0	0	0	0	0	0	0	0	0	0	0	0	0	0	0	0		0
espr_0746	750	0	10/31/2020	1582	1	5	4	0	1	0	NO		SI	0	0	10	1	NO	Peru	TUMBES	TUMBES	TUMBES	Mestizo		NO		NO				0	0	0	0	0	0	0	0	0	0	0	0	0	0	0	0	0		0
espr_0747	751	0	10/31/2020	1582	1	5	4	0	1	0	NO		SI	0	0	68	1	NO	Peru	TUMBES	TUMBES	TUMBES	Mestizo		NO		NO				0	0	0	0	0	0	0	0	0	0	0	0	0	0	0	0	0		0
espr_0748	752	0	10/31/2020	1642	1	4	2	0	1	0	SI	11/18/2020	SI	0	2	27	1	NO	Peru	TUMBES	TUMBES	TUMBES	Mestizo	2021-08-01	NO		NO				0	0	0	1	0	0	0	0	0	0	0	0	0	0	0	0	0		0
espr_0749	753	0	10/31/2020	1642	1	4	2	0	1	0	SI	11/18/2020	SI	0	2	25	0	NO	Peru	TUMBES	TUMBES	TUMBES	Mestizo	2021-09-01	NO		NO				0	1	1	1	1	1	1	0	1	0	0	0	0	0	1	1	0		0
espr_0750	754	0	10/31/2020	1642	1	4	2	0	1	0	SI	11/18/2020	SI	0	0	5	1	NO	Peru	TUMBES	TUMBES	TUMBES	Mestizo		NO		NO				0	0	0	0	0	0	0	0	0	0	0	0	0	0	0	0	0		0
espr_0751	755	0	10/31/2020	1642	1	4	2	0	1	0	SI	11/18/2020	SI	0	0	3	0	NO	Peru	TUMBES	TUMBES	TUMBES	Mestizo		NO		NO				0	0	0	0	0	0	0	0	0	0	0	0	0	0	0	0	0		0
espr_0752	756	0	10/31/2020	1642	1	4	2	0	1	0	SI	11/18/2020	SI	0	0	33	1	NO	Peru	TUMBES	TUMBES	TUMBES	Mestizo		NO		NO				0	0	0	0	0	0	0	0	0	0	0	0	0	0	0	0	0		0
espr_0753	757	4	10/31/2020	1652	1	5	3	0	1	0	SI	11/18/2020	NO	0
espr_0754	758	0	10/31/2020	1652	1	5	3	0	1	0	SI	11/18/2020	NO	0	0	33	0	NO	Peru	TUMBES	TUMBES	TUMBES	Mestizo		NO		NO				0	0	0	0	0	0	0	0	0	0	0	0	0	0	0	0	0		0
espr_0755	759	3	10/31/2020	1652	1	5	3	0	1	0	SI	11/18/2020	NO	0	2	14	1	NO	Peru	TUMBES	TUMBES	TUMBES	Mestizo		NO		NO				0	0	0	0	0	0	0	0	0	0	0	0	0	0	0	0	0		0
espr_0756	760	0	10/31/2020	1652	1	5	3	0	1	0	SI	11/18/2020	NO	0	0	9	1	NO	Peru	TUMBES	TUMBES	TUMBES	Mestizo		NO		NO				0	0	0	0	0	0	0	0	0	0	0	0	0	0	0	0	0		0
espr_0757	761	4	10/31/2020	1652	1	5	3	0	1	0	SI	11/18/2020	NO	0
espr_0758	762	3	10/31/2020	1653	1	2	3	0	1	0	SI	11/18/2020	SI	0	2	52	1	NO	Peru	TUMBES	TUMBES	TUMBES	Mestizo		NO		NO				0	0	0	0	0	0	0	0	0	0	0	0	0	0	0	0	0		0
espr_0759	763	2	10/31/2020	1653	1	2	3	0	1	0	SI	11/18/2020	SI	0	2	54	0	NO	Peru	TUMBES	TUMBES	TUMBES	Mestizo		NO		NO				0	0	0	0	0	0	0	0	0	0	0	0	0	0	0	0	0		0
espr_0760	764	0	10/31/2020	1674	1	5	2	0	1	0	SI	11/18/2020	NO	0	0	37	1	NO	Peru	TUMBES	TUMBES	TUMBES	Mestizo		NO		NO				0	0	0	0	0	0	0	0	0	0	0	0	0	0	0	0	0		0
espr_0761	765	2	10/31/2020	1674	1	5	2	0	1	0	SI	11/18/2020	NO	0	2	32	0	NO	Peru	TUMBES	TUMBES	TUMBES	Mestizo		NO		NO				0	0	0	0	0	0	0	0	0	0	0	0	0	0					0
espr_0762	766	2	10/31/2020	1674	1	5	2	0	1	0	SI	11/18/2020	NO	0	2	13	1	NO	Peru	TUMBES	TUMBES	TUMBES	Mestizo		NO		NO				0	0	0	0	0	0	0	0	0	0	0	0	0	0	0	0	0		0
espr_0763	767	2	10/31/2020	1674	1	5	2	0	1	0	SI	11/18/2020	NO	0	2	10	0	NO	Peru	TUMBES	TUMBES	TUMBES	Mestizo		NO		NO				0	0	0	0	0	0	0	0	0	0	0	0	0	0	0	0	0		0
espr_0764	768	4	10/31/2020	1674	1	5	2	0	1	0	SI	11/18/2020	NO	0
espr_0765	769	0	2020-02-11	485	1	4	5	0	0	0	SI	10/15/2020	SI	0	0	50	0	NO	Peru	TUMBES	TUMBES	TUMBES	Mestizo		NO		NO				0	0	0	0	0	0	0	0	0	0	0	0	0	0	0	0	0		0
espr_0766	770	0	2020-02-11	485	1	4	5	0	0	0	SI	10/15/2020	SI	0	0	15	1	NO	Peru	TUMBES	TUMBES	TUMBES	Mestizo		NO		NO				0	0	0	0	0	0	0	0	0	0	0	0	0	0	0	0	0		0
espr_0767	771	3	2020-02-11	485	1	4	5	0	0	0	SI	10/15/2020	SI	0	2	11	1	NO	Peru	TUMBES	TUMBES	TUMBES	Mestizo		NO		NO				0	0	0	0	0	0	0	0	0	0	0	0	0	0	0	0	0		0
espr_0768	772	0	2020-02-11	485	1	4	5	0	0	0	SI	10/15/2020	SI	0	0	33	0	NO	Peru	TUMBES	TUMBES	TUMBES	Mestizo		NO		NO				0	0	0	0	0	0	0	0	0	0	0	0	0	0	0	0	0		0
espr_0769	773	3	2020-02-11	539	1	1	4	0	1	0	SI	10/15/2020	SI	0	2	68	0		Peru	TUMBES	TUMBES	TUMBES	Mestizo		NO		NO				0	0	0	0	0	0	0	0	0	0	0	0	0	0	0	0	0		0
espr_0770	774	4	2020-02-11	123	2	7	5	0	1	0	SI	2020-09-01	SI	0
espr_0772	775	0	2020-02-11	123	2	7	5	0	1	0	SI	2020-09-01	SI	0	0	23	1	NO	Peru	TUMBES	TUMBES	TUMBES	Mestizo		NO		NO				0	0	0	0	0	0	0	0	0	0	0	0	0	0	0	0	0		0
espr_0773	776	4	2020-02-11	123	2	7	5	0	1	0	SI	2020-09-01	SI	0
espr_0774	777	0	2020-02-11	123	2	7	5	0	1	0	SI	2020-09-01	SI	0	0	12	1	NO	Peru	TUMBES	TUMBES	TUMBES	Mestizo		NO		NO				0	0	0	0	0	0	0	0	0	0	0	0	0	0	0	0	0		0
espr_0775	778	0	2020-02-11	123	2	7	5	0	1	0	SI	2020-09-01	SI	0	1	11	0	NO	Peru	TUMBES	TUMBES	TUMBES	Mestizo	11/19/2020	NO		NO				1	1	1	1	1	0	0	0	0	0	0	0	0	0	0	0	0		0
espr_0776	779	0	2020-02-11	123	2	7	5	0	1	0	SI	2020-09-01	SI	0	0	7	1	NO	Peru	TUMBES	TUMBES	TUMBES	Mestizo		NO		NO				0	0	0	0	0	0	0	0	0	0	0	0	0	0	0	0	0		0
espr_0777	780	4	2020-02-11	116	1	5	3	0	1	0	SI	10/18/2020	NO	0
espr_0778	781	0	2020-02-11	116	1	5	3	0	1	0	SI	10/18/2020	NO	0	0	28	0	NO	Peru	TUMBES	TUMBES	TUMBES	Mestizo	2020-01-06	NO		NO				1	0	1	0	0	0	0	0	1	0	0	0	0	0	0	0	0		0
espr_0779	782	0	2020-02-11	116	1	5	3	0	1	0	SI	10/18/2020	NO	0	0	11	0	NO	Peru	TUMBES	TUMBES	TUMBES	Mestizo		NO		NO				0	0	0	0	0	0	0	0	0	0	0	0	0	0	0	0	0		0
espr_0780	783	0	2020-02-11	116	1	5	3	0	1	0	SI	10/18/2020	NO	0	0	6	1	NO	Peru	TUMBES	TUMBES	TUMBES	Mestizo		NO		NO				0	0	0	0	0	0	0	0	0	0	0	0	0	0	0	0	0		0
espr_0781	784	4	2020-02-11	116	1	5	3	0	1	0	SI	10/18/2020	NO	0
espr_0782	785	3	2020-02-11	134	1	1	2	0	1	0	SI	10/18/2020	SI	2	2	23	1	NO	Peru	TUMBES	TUMBES	TUMBES	Mestizo		NO		NO				0	0	0	0	0	0	0	0	0	0	0	0	0	0	0	0	0		0
espr_0783	786	3	2020-02-11	135	1	3	4	0	1	0	NO		NO	0	2	31	1	NO	Peru	TUMBES	TUMBES	TUMBES	Mestizo		NO		NO				0	0	0	0	0	0	0	0	0	0	0	0	0	0	0	0	0		0
espr_0784	787	3	2020-02-11	135	1	3	4	0	1	0	NO		NO	0	2	29	0	NO	Peru	TUMBES	TUMBES	TUMBES	Mestizo		NO		NO				0	0	0	0	0	0	0	0	0	0	0	0	0	0	0	0	0		0
espr_0785	788	3	2020-02-11	135	1	3	4	0	1	0	NO		NO	0	2	6	1	NO	Peru	TUMBES	TUMBES	TUMBES	Mestizo		NO		NO				0	0	0	0	0	0	0	0	0	0	0	0	0	0	0	0	0		0
espr_0786	789	4	2020-02-11	86	1	4	3	3	1	0	NO		SI	0
espr_0787	790	0	2020-02-11	86	1	4	3	3	1	0	NO		SI	0	0	34	0	NO	Peru	TUMBES	TUMBES	TUMBES	Mestizo	2020-08-11	NO		NO				0	1	0	1	0	0	0	0	0	0	0	0	0	0	0	0	0		37
espr_0788	791	0	2020-02-11	86	1	4	3	3	1	0	NO		SI	0	0	38	1	NO	Peru	TUMBES	TUMBES	TUMBES	Mestizo		NO		NO				0	0	0	0	0	0	0	0	0	0	0	0	0	0	0	0	0		0
espr_0789	792	3	2020-02-11	86	1	4	3	3	1	0	NO		SI	0	2	12	0	NO	Peru	TUMBES	TUMBES	TUMBES	Mestizo	2020-05-11	SI	11/14/20	SI	11/14/20	NO		0	1	0	1	0	0	0	0	0	0	0	0	0	0	0	0	0		0
espr_0790	793	0	2020-02-11	112	1	3	2	0	1	0	SI	10/20/2020	SI	0	0	58	1	NO	Peru	TUMBES	TUMBES	TUMBES	Mestizo		NO		NO				0	0	0	0	0	0	0	0	0	0	0	0	0	0	0	0	0		0
espr_0791	794	4	2020-02-11	112	1	3	2	0	1	0	SI	10/20/2020	SI	0
espr_0792	795	0	2020-02-11	112	1	3	2	0	1	0	SI	10/20/2020	SI	0	0	16	0	NO	Peru	TUMBES	TUMBES	TUMBES	Mestizo		NO		NO				0	0	0	0	0	0	0	0	0	0	0	0	0	0	0	0	0		0
espr_0793	796	4	2020-02-11	1003	1	4	4	0	1	0	SI	2020-02-01	SI	1
espr_0794	797	4	2020-02-11	1003	1	4	4	0	1	0	SI	2020-02-01	SI	1
espr_0795	798	4	2020-02-11	1003	1	4	4	0	1	0	SI	2020-02-01	SI	1
espr_0796	799	4	2020-02-11	1003	1	4	4	0	1	0	SI	2020-02-01	SI	1
espr_0797	800	3	2020-02-11	1243	1	4	4	0	1	0	SI	2020-01-01	SI	2	2	37	1	NO	Peru	TUMBES	TUMBES	TUMBES	Mestizo		NO		NO				0	0	0	0	0	0	0	0	0	0	0	0	0	0	0	0	0		0
espr_0798	801	4	2020-02-11	1243	1	4	4	0	1	0	SI	2020-01-01	SI	2
espr_0799	802	0	2020-02-11	1243	1	4	4	0	1	0	SI	2020-01-01	SI	2	0	6	0	NO	Peru	TUMBES	TUMBES	TUMBES	Mestizo		NO						0	0	0	0	0	0	0	0	0	0	0	0	0	0	0	0	0		0
espr_0800	803	4	2020-02-11	1243	1	4	4	0	1	0	SI	2020-01-01	SI	2
espr_0801	804	0	2020-02-11	31	1	5	3	0	0	0	SI	2020-03-03	SI	2	0	46	1	NO	Peru	TUMBES	TUMBES	TUMBES	Mestizo		NO		NO				0	0	0	0	0	0	0	0	0	0	0	0	0	0					0
espr_0802	805	0	2020-02-11	31	1	5	3	0	0	0	SI	2020-03-03	SI	2	1	43	0	NO	Peru	TUMBES	TUMBES	TUMBES	Mestizo		NO		NO				0	0	0	0	0	0	0	0	0	0	0	0	0	0					0
espr_0803	806	0	2020-02-11	31	1	5	3	0	0	0	SI	2020-03-03	SI	2	0	20	0	NO	Peru	TUMBES	TUMBES	TUMBES	Mestizo		NO		NO				0	0	0	0	0	0	0	0	0	0	0	0	0	0					0
espr_0804	807	4	2020-02-11	31	1	5	3	0	0	0	SI	2020-03-03	SI	2
espr_0805	808	0	2020-02-11	31	1	5	3	0	0	0	SI	2020-03-03	SI	2	0	10	1	NO	Peru	TUMBES	TUMBES	TUMBES	Mestizo		NO		NO				0	0	0	0	0	0	0	0	0	0	0	0	0	0					0
espr_0806	809	0	2020-02-11	13	1	4	2	0	1	0	NO		NO	0	0	42	1	NO	Peru	TUMBES	TUMBES	TUMBES	Mestizo		NO		NO				0	0	0	0	0	0	0	0	0	0	0	0	0	0					0
espr_0807	810	4	2020-02-11	13	1	4	2	0	1	0	NO		NO	0
espr_0808	811	4	2020-02-11	13	1	4	2	0	1	0	NO		NO	0
espr_0809	812	4	2020-02-11	13	1	4	2	0	1	0	NO		NO	0
espr_0810	813	4	2020-02-11	64	1	5	1	0	1	0	NO		NO	0
espr_0811	814	0	2020-02-11	64	1	5	1	0	1	0	NO		NO	0	1	40	0	NO	Peru	TUMBES	TUMBES	TUMBES	Mestizo	2020-09-11	NO		NO				0	1	1	0	0	0	0	0	0	0	0	0	0	0	0	0	0		0
espr_0812	815	0	2020-02-11	64	1	5	1	0	1	0	NO		NO	0	0	12	1	NO	Peru	TUMBES	TUMBES	TUMBES	Mestizo		NO		NO				0	0	0	0	0	0	0	0	0	0	0	0	0	0	0	0	0		0
espr_0813	816	0	2020-02-11	64	1	5	1	0	1	0	NO		NO	0	2	26	0	NO	Peru	TUMBES	TUMBES	TUMBES	Mestizo		NO		NO				0	0	0	0	0	0	0	0	0	0	0	0	0	0	0	0	0		0
espr_0814	817	0	2020-02-11	64	1	5	1	0	1	0	NO		NO	0	0	22	1	NO	Peru	TUMBES	TUMBES	TUMBES	Mestizo		NO		NO				0	0	0	0	0	0	0	0	0	0	0	0	0	0	0	0	0		0
espr_0815	818	0	2020-02-11	107	2	5	2	0	1	0	NO		NO	0	0	44	0	NO	Peru	TUMBES	TUMBES	TUMBES	Mestizo		NO		NO				0	0	0	0	0	0	0	0	0	0	0	0	0	0	0	0	0		0
espr_0816	819	4	2020-02-11	107	2	5	2	0	1	0	NO		NO	0
espr_0817	820	0	2020-02-11	107	2	5	2	0	1	0	NO		NO	0	0	17	0	NO	Peru	TUMBES	TUMBES	TUMBES	Mestizo		NO		NO				0	0	0	0	0	0	0	0	0	0	0	0	0	0	0	0	0		0
espr_0818	821	4	2020-02-11	107	2	5	2	0	1	0	NO		NO	0
espr_0819	822	4	2020-02-11	107	2	5	2	0	1	0	NO		NO	0
espr_0820	823	0	2020-02-11	1045	1	1	2	0	0	0	NO		SI	2	1	58	1	NO	Peru	TUMBES	TUMBES	TUMBES	Mestizo	11/18/2020	NO		NO				0	0	0	1	0	0	0	0	0	0	0	0	0	0	0	0	0		0
espr_0821	824	0	2020-02-11	1343	1	7	4	0	1	0	NO		NO	2	0	57	1	NO	Peru	TUMBES	TUMBES	TUMBES	Mestizo		NO		NO				0	0	0	0	0	0	0	0	0	0	0	0	0	0					0
espr_0822	825	0	2020-02-11	1343	1	7	4	0	1	0	NO		NO	2	0	38	0	NO	Peru	TUMBES	TUMBES	TUMBES	Mestizo		NO		NO				0	0	0	0	0	0	0	0	0	0	0	0	0	0	0	0	0		0
espr_0823	826	0	2020-02-11	1343	1	7	4	0	1	0	NO		NO	2	0	41	1	NO	Peru	TUMBES	TUMBES	TUMBES	Mestizo		NO		NO				0	0	0	0	0	0	0	0	0	0	0	0	0	0	0	0	0		0
espr_0824	827	4	2020-02-11	1343	1	7	4	0	1	0	NO		NO	2
espr_0825	828	0	2020-02-11	1343	1	7	4	0	1	0	NO		NO	2	0	16	0	NO	Peru	TUMBES	TUMBES	TUMBES	Mestizo		NO		NO				0	0	0	0	0	0	0	0	0	0	0	0	0	0	0	0	0		0
espr_0826	829	0	2020-02-11	1343	1	7	4	0	1	0	NO		NO	2	0	5	1	NO	Peru	TUMBES	TUMBES	TUMBES	Mestizo		NO		NO				0	0	0	0	0	0	0	0	0	0	0	0	0	0	0	0	0		0
espr_0827	830	0	2020-02-11	1343	1	7	4	0	1	0	NO		NO	2	0	5	1	NO	Peru	TUMBES	TUMBES	TUMBES	Mestizo		NO		NO				0	0	0	0	0	0	0	0	0	0	0	0	0	0					0
espr_0828	831	4	2020-02-11	81	1	3	4	0	1	0	NO		SI	2
espr_0829	832	4	2020-02-11	81	1	3	4	0	1	0	NO		SI	2
espr_0830	833	4	2020-02-11	81	1	3	4	0	1	0	NO		SI	2
espr_0831	834	3	2020-02-11	101	1	4	6	0	1	0	SI	10/15/2020	SI	0	2	55	1	NO	Peru	TUMBES	TUMBES	TUMBES	Mestizo	2020-08-06	SI	6/20/20	SI	6/16/20	NO		0	0	1	1	1	1	0	0	1	0	0	0	0	0	0	0	0		0
espr_0832	835	3	2020-02-11	101	1	4	6	0	1	0	SI	10/15/2020	SI	0	2	54	0	NO	Peru	TUMBES	TUMBES	TUMBES	Mestizo		NO		NO				0	0	0	0	0	0	0	0	0	0	0	0	0	0	0	0	0		0
espr_0833	836	4	2020-02-11	101	1	4	6	0	1	0	SI	10/15/2020	SI	0
espr_0834	837	2	2020-02-11	101	1	4	6	0	1	0	SI	10/15/2020	SI	0	2	19	0	NO	Peru	TUMBES	TUMBES	TUMBES	Mestizo		NO		NO				0	0	0	0	0	0	0	0	0	0	0	0	0	0					0
espr_0835	838	0	2020-02-11	111	1	3	5	0	1	0	SI	10/15/2020	SI	0	1	50	0	NO	Peru	TUMBES	TUMBES	TUMBES	Mestizo	2020-09-11	NO		NO				1	0	0	0	0	0	0	0	0	0	0	0	0	0	0	0	0		0
espr_0836	839	0	2020-02-11	111	1	3	5	0	1	0	SI	10/15/2020	SI	0	0	27	0	NO	Peru	TUMBES	TUMBES	TUMBES	Mestizo		NO		NO				0	0	0	0	0	0	0	0	0	0	0	0	0	0	0	0	0		0
espr_0837	840	0	2020-02-11	111	1	3	5	0	1	0	SI	10/15/2020	SI	0	0	3	1	NO	Peru	TUMBES	TUMBES	TUMBES	Mestizo		NO		NO				0	0	0	0	0	0	0	0	0	0	0	0	0	0	0	0	0		0
espr_0838	841	0	2020-02-11	120	1	4	5	0	1	0	SI	10/15/2020	SI	0	0	49	0	NO	Peru	TUMBES	TUMBES	TUMBES	Mestizo		NO		NO				0	0	0	0	0	0	0	0	0	0	0	0	0	0	0	0	0		0
espr_0839	842	0	2020-02-11	120	1	4	5	0	1	0	SI	10/15/2020	SI	0	0	21	0	NO	Peru	TUMBES	TUMBES	TUMBES	Mestizo		NO		NO				0	0	0	0	0	0	0	0	0	0	0	0	0	0					0
espr_0840	843	4	2020-02-11	120	1	4	5	0	1	0	SI	10/15/2020	SI	0
espr_0841	844	0	2020-02-11	120	1	4	5	0	1	0	SI	10/15/2020	SI	0	0	58	1	NO	Peru	TUMBES	TUMBES	TUMBES	Mestizo		NO		NO				0	0	0	0	0	0	0	0	0	0	0	0	0	0					0
espr_0842	845	0	2020-04-11	455	1	1	3	0	1	0	SI	2019-12-12	SI	0	0	72	1	NO	Peru	TUMBES	TUMBES	TUMBES	Mestizo		NO		NO				0	0	0	0	0	0	0	0	0	0	0	0	0	0	0	0	0		0
espr_0843	846	1	2020-04-11	1319	2	7	4	0	1	0	NO		SI	0	2	47	1		Peru	TUMBES	TUMBES	TUMBES	Mestizo	11/17/2020	NO		NO				0	0	0	1	0	0	0	0	0	0	0	0	0	0	0	0	0		0
espr_0844	847	2	2020-04-11	1319	2	7	4	0	1	0	NO		SI	0	2	45	0
espr_0845	848	3	2020-04-11	1319	2	7	4	0	1	0	NO		SI	0	2	28	1	NO	Peru	TUMBES	TUMBES	TUMBES	Mestizo		NO		NO				0	0	0	0	0	0	0	0	0	0	0	0	0	0	0	0	0		0
espr_0846	849	4	2020-04-11	1319	2	7	4	0	1	0	NO		SI	0
espr_0847	850	3	2020-04-11	1319	2	7	4	0	1	0	NO		SI	0	2	14	0	NO	Peru	TUMBES	TUMBES	TUMBES	Mestizo		NO		NO				0	0	0	0	0	0	0	0	0	0	0	0	0	0	0	0	0		0
espr_0848	851	0	2020-04-11	1319	2	7	4	0	1	0	NO		SI	0	0	23	0	NO	Peru	TUMBES	TUMBES	LA CRUZ	Mestizo		NO		NO				0	0	0	0	0	0	0	0	0	0	0	0	0	0	0	0	0		0
espr_0849	852	4	2020-04-11	1319	2	7	4	0	1	0	NO		SI	0
espr_0850	853	4	2020-04-11	1169	1	3	4	0	1	0	SI	2020-10-05	SI	0
espr_0851	854	0	2020-04-11	1169	1	3	4	0	1	0	SI	2020-10-05	SI	0	1	25	0	NO	Peru	TUMBES	TUMBES	TUMBES	Mestizo	11/17/2020	NO		NO				0	0	0	1	0	0	0	0	0	0	0	0	0	0	0	0	0		0
espr_0852	855	3	2020-04-11	1169	1	3	4	0	1	0	SI	2020-10-05	SI	0	0	3	0	NO	Peru	TUMBES	TUMBES	TUMBES	Mestizo		NO		NO				1	0	0	0	0	0	0	0	0	0	0	0	0	0	0	0	0		0
espr_0853	856	0	2020-04-11	559	1	3	4	0	1	0	SI	10/25/2020	SI	0	0	68	1	NO	Peru	TUMBES	TUMBES	TUMBES	Mestizo		NO		NO				1	0	1	0	0	1	0	0	0	0	0	0	0	0	0	0	0		0
espr_0854	857	0	2020-04-11	559	1	3	4	0	1	0	SI	10/25/2020	SI	0	0	68	0	NO	Peru	TUMBES	TUMBES	TUMBES	Mestizo		NO		NO				0	0	1	0	1	0	0	0	0	0	0	0	0	0	0	0	0		0
espr_0855	858	4	2020-04-11	559	1	3	4	0	1	0	SI	10/25/2020	SI	0
espr_0856	859	0	2020-04-11	571	1	6	5	0	0	0	NO		SI	0	0	59	1	NO	Peru	TUMBES	TUMBES	TUMBES	Mestizo		NO		NO				1	0	0	0	0	0	0	0	0	0	0	0	0	0	1	0	0	Escalofrios, Ansiedad	0
espr_0857	860	0	2020-04-11	571	1	6	5	0	0	0	NO		SI	0	0	59	0	NO	Peru	TUMBES	TUMBES	TUMBES	Mestizo		NO		NO				0	0	0	0	0	1	0	0	0	0	0	0	0	0	0	0	0	0	0
espr_0858	861	0	2020-04-11	571	1	6	5	0	0	0	NO		SI	0	0	37	1	NO	Peru	TUMBES	TUMBES	TUMBES	Mestizo		NO		NO				0	0	0	0	0	0	0	0	0	0	0	0	0	0	0	0	0	0	0
espr_0859	862	1	2020-04-11	571	1	6	5	0	0	0	NO		SI	0	2	32	0	NO	Peru	TUMBES	TUMBES	TUMBES	Mestizo		NO		SI	11/20/2020			0	0	0	0	0	0	0	0	0	0	0	0	0	0	0	0	0		0
espr_0860	863	3	2020-04-11	571	1	6	5	0	0	0	NO		SI	0	2	7	1	NO	Peru	TUMBES	TUMBES	TUMBES	Mestizo		NO		NO				0	0	0	0	0	0	0	0	0	0	0	0	0	0	0	0	0		0
espr_0861	864	0	2020-04-11	571	1	6	5	0	0	0	NO		SI	0	2	18	0	NO	Peru	TUMBES	TUMBES	TUMBES	Mestizo		NO		SI	11/20/2020			0	0	0	0	0	0	0	0	0	0	0	0	0	0	0	0	0		0
espr_0861	865	2	2020-04-11	571	1	6	5	0	0	0	NO		SI	0	1	54	0		Peru	TUMBES	TUMBES	TUMBES	Mestizo	2021-08-01	NO		NO				0	0	0	1	0	0	0	0	0	0	0	0	0	0	0	0	0
espr_0862	866	3	2020-04-11	549	1	6	4	0	1	0	SI	2019-12-12	SI	0	2	50	1		Peru	TUMBES	TUMBES	TUMBES		2020-07-06	NO		NO				1	0	1	1	0	0	1	0	1	0	0	0	0	0	0	0	0	DOLOR PULMON,Dolor de Espalda	0
espr_0863	867	3	2020-04-11	549	1	6	4	0	1	0	SI	2019-12-12	SI	0	2	51	0	NO	Peru	TUMBES	TUMBES	TUMBES	Mestizo		NO		NO				0	0	0	0	0	0	0	0	0	0	0	0	0	0					0
espr_0864	868	4	2020-04-11	549	1	6	4	0	1	0	SI	2019-12-12	SI	0
espr_0865	869	3	2020-04-11	549	1	6	4	0	1	0	SI	2019-12-12	SI	0	2	26	0	NO	Peru	TUMBES	TUMBES	TUMBES	Mestizo		NO		NO				0	0	0	0	0	0	0	0	0	0	0	0	0	0					0
espr_0866	870	4	2020-04-11	549	1	6	4	0	1	0	SI	2019-12-12	SI	0
espr_0867	871	3	2020-04-11	549	1	6	4	0	1	0	SI	2019-12-12	SI	0	2	20	0	NO	Peru	TUMBES	TUMBES	TUMBES	Mestizo		NO		NO				0	0	0	0	0	0	0	0	0	0	0	0	0	0					0
espr_0868	872	4	2020-04-11	526	1	3	4	0	1	0	SI	10/25/2020	SI	2
espr_0869	873	4	2020-04-11	526	1	3	4	0	1	0	SI	10/25/2020	SI	2
espr_0870	874	0	2020-04-11	526	1	3	4	0	1	0	SI	10/25/2020	SI	2	0	31	0	NO	Peru	TUMBES	TUMBES	TUMBES	Mestizo		NO		NO				0	0	0	0	0	0	0	0	0	0	0	0	0	0	0	0	0		0
espr_0871	875	2	2020-04-11	409	1	4	3	0	1	0	NO		SI	2	2	32	1	SI	Peru	TUMBES	TUMBES	TUMBES	Mestizo	5/24/2020	NO		NO				1	0	0	0	0	0	0	0	0	0	0	0	0	0	0	0	0		38
espr_0872	876	0	2020-04-11	409	1	4	3	0	1	0	NO		SI	2	0	24	0	SI	Peru	TUMBES	TUMBES	TUMBES	Mestizo		NO		NO				0	0	0	0	0	0	0	0	0	0	0	0	0	0	0	0	0		0
espr_0873	877	4	2020-04-11	409	1	4	3	0	1	0	NO		SI	2
espr_0874	878	4	2020-04-11	409	1	4	3	0	1	0	NO		SI	2
espr_0875	879	3	2020-04-11	1305	1	2	4	0	1	0	NO		NO	0	2	66	1
espr_0876	880	3	2020-04-11	1305	1	2	4	0	1	0	NO		NO	0	1	62	0		Peru	TUMBES	TUMBES	TUMBES	Mestizo	11/16/2020	NO		NO				0	1	0	0	1	0	0	0	0	0	0	0	0	0	0	0	0		0
espr_0877	881	2	2020-04-11	400	1	8	6	0	1	0	NO		NO	2	2	66	1	NO	Peru	TUMBES	TUMBES	TUMBES	Mestizo		NO		NO				0	0	0	0	0	0	0	0	0	0	0	0	0	0	0	0	0		0
espr_0878	882	0	2020-04-11	400	1	8	6	0	1	0	NO		NO	2	0	69	0	NO	Peru	TUMBES	TUMBES	TUMBES	Mestizo		NO		NO				0	0	0	0	0	0	0	0	0	0	0	0	0	0	0	0	0		0
espr_0879	883	4	2020-04-11	400	1	8	6	0	1	0	NO		NO	2
espr_0880	884	0	2020-04-11	400	1	8	6	0	1	0	NO		NO	2	0	41	0	NO	Peru	TUMBES	TUMBES	TUMBES	Mestizo		NO		NO				0	0	0	0	0	0	0	0	0	0	0	0	0	0	0	0	0		0
espr_0881	885	2	2020-04-11	400	1	8	6	0	1	0	NO		NO	2	2	12	0	NO	Peru	TUMBES	TUMBES	TUMBES	Mestizo		NO		SI	11/14/2020			0	0	0	0	0	0	0	0	0	0	0	0	0	0	0	0	0		0
espr_0882	886	0	2020-04-11	400	1	8	6	0	1	0	NO		NO	2	0	3	0	NO	Peru	TUMBES	TUMBES	TUMBES	Mestizo		NO		NO				0	0	0	0	0	0	0	0	0	0	0	0	0	0	0	0	0		0
espr_0883	887	3	2020-04-11	400	1	8	6	0	1	0	NO		NO	2	2	2	1	NO	Peru	TUMBES	TUMBES	TUMBES	Mestizo		NO		NO				0	0	0	0	0	0	0	0	0	0	0	0	0	0	0	0	0		0
espr_0884	888	3	2020-04-11	400	1	8	6	0	1	0	NO		NO	2	2	18	1	NO	Peru	TUMBES	TUMBES	TUMBES	Mestizo		NO		NO				0	0	0	0	0	0	0	0	0	0	0	0	0	0	0	0	0		0
espr_0885	889	0	2020-04-11	105	1	5	3	0	1	0	SI	10/15/2020	NO	0	2	53	1	NO	Peru	TUMBES	TUMBES	TUMBES	Mestizo		NO		NO				0	0	0	0	0	0	0	0	0	0	0	0	0	0					0
espr_0886	890	3	2020-04-11	105	1	5	3	0	1	0	SI	10/15/2020	NO	0	0	48	0	NO	Peru	TUMBES	TUMBES	TUMBES	Mestizo		NO		NO				0	0	0	0	0	0	0	0	0	0	0	0	0	0	0	0	0		0
espr_0887	891	2	2020-04-11	105	1	5	3	0	1	0	SI	10/15/2020	NO	0	0	32	1	NO	Peru	TUMBES	TUMBES	TUMBES	Mestizo		NO		NO				0	0	0	0	0	0	0	0	0	0	0	0	0	0	0	0	0		0
espr_0888	892	2	2020-04-11	105	1	5	3	0	1	0	SI	10/15/2020	NO	0	2	18	0	NO	Peru	TUMBES	TUMBES	TUMBES	Mestizo	2020-09-11	NO		NO				0	1	0	1	1	0	0	0	0	0	0	0	0	0	0	0	0		0
espr_0889	893	2	2020-04-11	105	1	5	3	0	1	0	SI	10/15/2020	NO	0	2	45	1	NO	Peru	TUMBES	TUMBES	TUMBES	Mestizo		NO		NO				0	0	0	0	0	0	0	0	0	0	0	0	0	0	0	0	0		0
espr_0890	894	2	2020-04-11	35	1	4	1	0	1	0	NO		NO	3	2	43	1	NO	Peru	TUMBES	TUMBES	TUMBES	Mestizo		NO		NO				0	0	0	0	0	0	0	0	0	0	0	0	0	0					0
espr_0891	895	0	2020-04-11	35	1	4	1	0	1	0	NO		NO	3	0	14	1	NO	Peru	TUMBES	TUMBES	TUMBES	Mestizo		NO		NO				0	0	0	0	0	0	0	0	0	0	0	0	0	0					0
espr_0892	896	0	2020-04-11	35	1	4	1	0	1	0	NO		NO	3	0	10	0	NO	Peru	TUMBES	TUMBES	TUMBES	Mestizo		NO		NO				0	0	0	0	0	0	0	0	0	0	0	0	0	0					0
espr_0893	897	0	2020-04-11	35	1	4	1	0	1	0	NO		NO	3	0	7	0	NO	Peru	TUMBES	TUMBES	TUMBES	Mestizo		NO		NO				0	0	0	0	0	0	0	0	0	0	0	0	0	0					0
espr_0894	898	0	2020-04-11	61	1	6	5	0	1	0	NO		SI	0	0	48	0	NO	Peru	TUMBES	TUMBES	TUMBES	Mestizo		NO		NO				0	0	0	0	0	0	0	0	0	0	0	0	0	0					0
espr_0895	899	0	2020-04-11	61	1	6	5	0	1	0	NO		SI	0	0	22	1	NO	Peru	TUMBES	TUMBES	TUMBES	Mestizo		NO		NO				0	0	0	0	0	0	0	0	0	0	0	0	0	0	0	0	0		0
espr_0896	900	4	2020-04-11	61	1	6	5	0	1	0	NO		SI	0
espr_0897	901	0	2020-04-11	61	1	6	5	0	1	0	NO		SI	0	0	12	0	NO	Peru	TUMBES	TUMBES	TUMBES	Mestizo		NO		NO				0	0	0	0	0	0	0	0	0	0	0	0	0	0	0	0	0		0
espr_0898	902	0	2020-04-11	61	1	6	5	0	1	0	NO		SI	0	0	7	1	NO	Peru	TUMBES	TUMBES	TUMBES	Mestizo		NO		NO				0	0	0	0	0	0	0	0	0	0	0	0	0	0	0	0	0		0
espr_0899	903	0	2020-04-11	61	1	6	5	0	1	0	NO		SI	0	0	45	1	NO	Peru	TUMBES	TUMBES	TUMBES	Mestizo		NO		NO				0	0	0	0	0	0	0	0	0	0	0	0	0	0	0	0	0		0
espr_0900	904	3	2020-04-11	1318	1	3	4	0	1	1	NO			0	2	54	1	NO	Peru	TUMBES	TUMBES	TUMBES	Mestizo		NO		NO				0	0	0	0	0	0	0	0	0	0	0	0	0	0					0
espr_0901	905	0	2020-04-11	1318	1	3	4	0	1	1	NO			0	1	51	0	NO	Peru	TUMBES	TUMBES	TUMBES	Mestizo	11/17/2020	NO		NO				0	0	0	1	0	0	0	0	0	0	0	0	0	0	0	0	0		0
espr_0902	906	4	2020-04-11	1318	1	3	4	0	1	1	NO			0
espr_0903	907	0	2020-04-11	1185	1	1	3	0	1	0	NO		NO	2	0	63	1	NO	Peru	TUMBES	TUMBES	TUMBES	Mestizo		NO		NO				0	0	0	0	0	0	0	0	0	0	0	0	0	0	0	0	0		0
espr_0904	908	4	2020-03-11	1311	1	2	3	0	1	0	NO		NO	2
espr_0905	909	0	2020-03-11	1311	1	2	3	0	1	0	NO		NO	2	1	52	0	NO	Peru	TUMBES	TUMBES	TUMBES	Mestizo	2020-11-11	NO		NO				0	1	1	1	1	0	0	0	1	0	0	0	0	0	0	0	0		0
espr_0906	910	4	2020-03-11	572	1	5	3	0	1	0	SI	10/23/2020	SI	0
espr_0907	911	3	2020-03-11	572	1	5	3	0	1	0	SI	10/23/2020	SI	0	2	40	0	NO	Peru	TUMBES	TUMBES	TUMBES	Mestizo		NO		NO				1	0	0	1	0	0	0	0	0	0	0	0	0	0	1	1	0		0
espr_0908	912	2	2020-03-11	572	1	5	3	0	1	0	SI	10/23/2020	SI	0	2	19	0	NO	Peru	TUMBES	TUMBES	TUMBES	Mestizo	2020-01-06	NO		NO				1	0	1	1	0	1	0	0	0	0	0	0	0	0	0	0	0		0
espr_0909	913	2	2020-03-11	572	1	5	3	0	1	0	SI	10/23/2020	SI	0	2	13	1	NO	Peru	TUMBES	TUMBES	TUMBES	Mestizo		NO		NO				1	0	0	0	0	0	0	0	1	0	0	0	0	0	0	0	0		0
espr_0910	914	3	2020-03-11	572	1	5	3	0	1	0	SI	10/23/2020	SI	0	2	3	0	NO	Peru	TUMBES	TUMBES	TUMBES	Mestizo		NO		NO				1	0	0	0	0	0	0	0	0	0	0	0	0	0	0	0	0		0
espr_0911	915	4	2020-03-11	1320	1	5	3	0	1	0	SI	10/15/2020	SI	2
espr_0912	916	4	2020-03-11	1320	1	5	3	0	1	0	SI	10/15/2020	SI	2
espr_0913	917	4	2020-03-11	1320	1	5	3	0	1	0	SI	10/15/2020	SI	2
espr_0914	918	4	2020-03-11	1320	1	5	3	0	1	0	SI	10/15/2020	SI	2
espr_0915	919	4	2020-03-11	1320	1	5	3	0	1	0	SI	10/15/2020	SI	2
espr_0916	920	4	2020-03-11	1159	1	5	6	0	1	0	SI	2020-10-10	SI	0
espr_0917	921	0	2020-03-11	1159	1	5	6	0	1	0	SI	2020-10-10	SI	0	1	29	0	SI	Peru	TUMBES	TUMBES	TUMBES	Mestizo	11/17/2020	NO		NO				0	0	0	1	0	0	0	0	0	0	0	0	0	0	0	0	0		0
espr_0918	922	0	2020-03-11	1159	1	5	6	0	1	0	SI	2020-10-10	SI	0	0	9	0	SI	Peru	TUMBES	TUMBES	TUMBES	Mestizo		NO		NO				0	0	0	0	0	0	0	0	0	0	0	0	0	0	0	0	0		0
espr_0919	923	0	2020-03-11	1159	1	5	6	0	1	0	SI	2020-10-10	SI	0	0	1	1	NO	Peru	TUMBES	TUMBES	TUMBES	Mestizo		NO		NO				0	0	0	0	0	0	0	0	0	0	0	0	0	0	0	0	0	0	0
espr_0920	924	4	2020-03-11	1159	1	5	6	0	1	0	SI	2020-10-10	SI	0
espr_0921	925	4	2020-03-11	1154	1	3	4	0	1	0	NO		SI	0
espr_0922	926	0	2020-03-11	1154	1	3	4	0	1	0	NO		SI	0	0	24	0	NO	Peru	TUMBES	TUMBES	TUMBES	Mestizo		NO		NO				0	0	0	0	0	0	0	0	0	0	0	0	0	0	0	0	0		0
espr_0923	927	0	2020-03-11	1154	1	3	4	0	1	0	NO		SI	0	0	7	1	NO	Peru	TUMBES	TUMBES	TUMBES	Mestizo		NO		NO				0	0	0	0	0	0	0	0	0	0	0	0	0	0					0
espr_0924	928	0	2020-03-11	1252	1	5	6	0	1	0	NO		SI	0	0	29	1	NO	Peru	TUMBES	TUMBES	TUMBES	Mestizo		NO		NO				0	0	0	0	0	0	0	0	0	0	0	0	0	0					0
espr_0925	929	4	2020-03-11	1252	1	5	6	0	1	0	NO		SI	0
espr_0926	930	0	2020-03-11	1252	1	5	6	0	1	0	NO		SI	0	0	11	1	NO	Peru	TUMBES	TUMBES	TUMBES	Mestizo		NO		NO				0	0	0	0	0	0	0	0	0	0	0	0	0	0					0
espr_0927	931	4	2020-03-11	1252	1	5	6	0	1	0	NO		SI	0
espr_0928	932	3	2020-03-11	1252	1	5	6	0	1	0	NO		SI	0	2	6	1	NO	Peru	TUMBES	TUMBES	TUMBES	Mestizo		NO		NO				0	0	0	0	0	0	0	0	0	0	0	0	0	0					0
espr_0929	933	0	2020-03-11	1152	1	3	2	0	1	0	NO		NO	2	0	50	0	NO	Peru	TUMBES	TUMBES	TUMBES	Mestizo		NO		NO				0	0	0	0	0	0	0	0	0	0	0	0	0	0					0
espr_0930	934	3	2020-03-11	1152	1	3	2	0	1	0	NO		NO	2	2	47	1	NO	Peru	TUMBES	TUMBES	TUMBES	Mestizo		NO		NO				0	0	0	0	0	0	0	0	0	0	0	0	0	0					0
espr_0931	935	0	2020-03-11	1152	1	3	2	0	1	0	NO		NO	2	0	14	1	NO	Peru	TUMBES	TUMBES	TUMBES	Mestizo		NO		NO				0	0	0	0	0	0	0	0	0	0	0	0	0	0					0
espr_0932	936	4	2020-03-11	417	1	5	5	0	1	0	SI	10/14/2020	SI	3
espr_0933	937	0	2020-03-11	417	1	5	5	0	1	0	SI	10/14/2020	SI	3	1	47	0	NO	Peru	TUMBES	TUMBES	TUMBES	Mestizo	11/17/2020	NO		NO				0	0	0	1	0	0	0	0	0	0	0	0	0	0	0	0	0		0
espr_0934	938	0	2020-03-11	417	1	5	5	0	1	0	SI	10/14/2020	SI	3	0	18	0	NO	Peru	TUMBES	TUMBES	TUMBES	Mestizo		NO		NO				0	0	0	0	0	0	0	0	0	0	0	0	0	0					0
espr_0935	939	4	2020-02-11	1551	1	4	2	2	1	0	NO		NO	2
espr_0936	940	4	2020-03-11	417	1	5	5	0	1	0	SI	10/14/2020	SI	3
espr_0937	941	0	2020-03-11	1254	1	5	4	0	1	0	SI	10/15/2020	SI	2	1	26	1	NO	Peru	TUMBES	TUMBES	TUMBES	Mestizo	11/17/2020	NO		NO				0	0	1	1	0	0	0	0	0	0	0	0	0	0	0	0	0		0
espr_0938	942	0	2020-03-11	1254	1	5	4	0	1	0	SI	10/15/2020	SI	2	0	26	0	NO	Peru	TUMBES	TUMBES	TUMBES	Mestizo		NO		NO				0	0	0	0	0	0	0	0	0	0	0	0	0	0	0	0	0		0
espr_0939	943	4	2020-03-11	1254	1	5	4	0	1	0	SI	10/15/2020	SI	2
espr_0940	944	0	2020-03-11	1254	1	5	4	0	1	0	SI	10/15/2020	SI	2	0	2	1	NO	Peru	TUMBES	TUMBES	TUMBES	Mestizo		NO		NO				0	0	0	0	0	0	0	0	0	0	0	0	0	0	0	0	0		0
espr_0941	945	4	2020-03-11	1254	1	5	4	0	1	0	SI	10/15/2020	SI	2
espr_0942	946	0	2020-03-11	1087	1	4	3	0	0	0	SI	10/25/2010	SI	0	0	39	0	NO	Peru	TUMBES	TUMBES	TUMBES	Mestizo		NO		NO				0	0	0	0	0	0	0	0	0	0	0	0	0	0	0	0	0		0
espr_0943	947	4	2020-03-11	1087	1	4	3	0	0	0	SI	10/25/2010	SI	0
espr_0944	948	0	2020-03-11	1087	1	4	3	0	0	0	SI	10/25/2010	SI	0	0	16	0	NO	Peru	TUMBES	TUMBES	TUMBES	Mestizo		NO		NO				0	0	0	0	0	0	0	0	0	0	0	0	0	0	0	0	0		0
espr_0945	949	0	2020-03-11	1087	1	4	3	0	0	0	SI	10/25/2010	SI	0	0	8	0	NO	Peru	TUMBES	TUMBES	TUMBES	Mestizo		NO		NO				0	0	0	0	0	0	0	0	0	0	0	0	0	0	0	0	0		0
espr_0946	950	0	2020-05-11	1328	1	3	4	0	1	0	SI	10/20/2020	NO	0	0	52	0	SI	Peru	TUMBES	TUMBES	TUMBES	Mestizo		NO		NO				0	0	0	0	0	0	0	0	0	0	0	0	0	0	0	0	0		0
espr_0947	951	3	2020-05-11	1328	1	3	4	0	1	0	SI	10/20/2020	NO	0	2	9	0	NO	Peru	TUMBES	TUMBES	TUMBES	Mestizo		NO		NO				0	0	0	0	0	0	0	0	0	0	0	0	0	0	0	0	0		0
espr_0948	952	0	2020-05-11	1012	1	5	3	0	1	0	SI	10/20/2020	SI	2	0	42	1	NO	Peru	TUMBES	TUMBES	TUMBES	Mestizo		NO		NO				0	0	0	0	0	0	0	0	0	0	0	0	0	0	0	0	0		0
espr_0949	953	0	2020-05-11	1012	1	5	3	0	1	0	SI	10/20/2020	SI	2	0	36	0	NO	Peru	TUMBES	TUMBES	TUMBES	Mestizo		NO		NO				0	0	0	0	0	0	0	0	0	0	0	0	0	0	0	0	0		0
espr_0950	954	0	2020-05-11	1012	1	5	3	0	1	0	SI	10/20/2020	SI	2	0	11	1	NO	Peru	TUMBES	TUMBES	TUMBES	Mestizo		NO		NO				0	0	0	0	0	0	0	0	0	0	0	0	0	0					0
espr_0951	955	0	2020-05-11	1012	1	5	3	0	1	0	SI	10/20/2020	SI	2	0	8	0	NO	Peru	TUMBES	TUMBES	TUMBES	Mestizo		NO		NO				0	0	0	0	0	0	0	0	0	0	0	0	0	0					0
espr_0952	956	4	2020-05-11	1012	1	5	3	0	1	0	SI	10/20/2020	SI	2
espr_0953	957	0	2020-05-11	1233	1	4	3	0	1	0	NO		SI	0	0	31	1	NO	Peru	TUMBES	TUMBES	TUMBES	Mestizo		NO		NO				0	0	0	0	0	0	0	0	0	0	0	0	0	0					0
espr_0954	958	0	2020-05-11	1233	1	4	3	0	1	0	NO		SI	0	0	30	0	NO	Peru	TUMBES	TUMBES	TUMBES	Mestizo		NO		NO				0	0	0	0	0	0	0	0	0	0	0	0	0	0					0
espr_0955	959	0	2020-05-11	1233	1	4	3	0	1	0	NO		SI	0	0	12	1	NO	Peru	TUMBES	TUMBES	TUMBES	Mestizo		NO		NO				0	0	0	0	0	0	0	0	0	0	0	0	0	0					0
espr_0956	960	0	2020-05-11	1233	1	4	3	0	1	0	NO		SI	0	0	9	1	NO	Peru	TUMBES	TUMBES	TUMBES	Mestizo		NO		NO				0	0	0	0	0	0	0	0	0	0	0	0	0	0					0
espr_0957	961	4	2020-05-11	1130	1	5	3	0	1	0	NO		SI	0
espr_0958	962	0	2020-05-11	1130	1	5	3	0	1	0	NO		SI	0	0	37	0	NO	Peru	TUMBES	TUMBES	TUMBES	Mestizo		NO		NO				0	0	0	0	0	0	0	0	0	0	0	0	0	0	0	0	0		0
espr_0959	963	4	2020-05-11	1130	1	5	3	0	1	0	NO		SI	0
espr_0960	964	4	2020-05-11	1130	1	5	3	0	1	0	NO		SI	0
espr_0961	965	4	2020-05-11	1130	1	5	3	0	1	0	NO		SI	0
espr_0962	966	0	2020-05-11	404	1	2	2	0	1	0	NO		SI	0	0	20	1	NO	Peru	TUMBES	TUMBES	TUMBES	Mestizo		NO		NO				0	0	0	0	0	0	0	0	0	0	0	0	0	0	0	0	0		0
espr_0963	967	0	2020-05-11	404	1	2	2	0	1	0	NO		SI	0	0	17	0	NO	Peru	TUMBES	TUMBES	TUMBES	Mestizo		NO		NO				0	0	0	0	0	0	0	0	0	0	0	0	0	0	0	0	0		0
espr_0964	968	0	2020-05-11	415	2	8	3	0	1	0	NO		SI	2	0	24	1	NO	Peru	TUMBES	TUMBES	TUMBES	Mestizo		NO		NO				0	0	0	0	0	0	0	0	0	0	0	0	0	0	0	0	0		0
espr_0965	969	0	2020-05-11	415	2	8	3	0	1	0	NO		SI	2	0	28	1	NO	Peru	TUMBES	ZARUMILLA	PAPAYAL	Mestizo		NO		NO				1	1	1	0	1	1	0	0	0	1	0	0	0	0	0	0	0		0
espr_0966	970	0	2020-05-11	415	2	8	3	0	1	0	NO		SI	2	0	19	1	NO	Peru	TUMBES	TUMBES	TUMBES	Mestizo		NO		NO				0	0	0	0	0	0	0	0	0	0	0	0	0	0	0	0	0		0
espr_0967	971	0	2020-05-11	415	2	8	3	0	1	0	NO		SI	2	0	36	1	NO	Peru	TUMBES	TUMBES	TUMBES	Mestizo		NO		NO				0	0	0	0	0	0	0	0	0	0	0	0	0	0	0	0	0		0
espr_0968	972	4	2020-05-11	415	2	8	3	0	1	0	NO		SI	2
espr_0969	973	0	2020-05-11	415	2	8	3	0	1	0	NO		SI	2	0	19	1	NO	Peru	TUMBES	TUMBES	TUMBES	Mestizo		NO		NO				0	0	0	0	0	0	0	0	0	0	0	0	0	0	0	0	0		0
espr_0970	974	0	2020-05-11	415	2	8	3	0	1	0	NO		SI	2	0	34	1	SI	Peru	TUMBES	TUMBES	TUMBES	Mestizo		NO		NO				0	0	0	0	0	0	0	0	0	0	0	0	0	0	0	0	0		0
espr_0971	975	0	2020-05-11	415	2	8	3	0	1	0	NO		SI	2	0	38	0	NO	Peru	TUMBES	TUMBES	TUMBES	Mestizo		NO		NO				0	0	1	0	0	0	0	0	1	0	1	0	0	0	0	0	0		0
espr_0972	976	0	2020-05-11	1016	1	3	4	0	1	0	SI	10/25/2020	SI	2	1	38	0	NO	Peru	TUMBES	TUMBES	TUMBES	Mestizo	11/18/2020	NO		NO				0	0	0	1	0	0	0	0	0	0	0	0	0	0	0	0	0		0
espr_0973	977	0	2020-05-11	1016	1	3	4	0	1	0	SI	10/25/2020	SI	2	0	15	0	NO	Peru	TUMBES	TUMBES	TUMBES	Mestizo		NO		NO				0	0	0	0	0	0	0	0	0	0	0	0	0	0					0
espr_0974	978	0	2020-05-11	1016	1	3	4	0	1	0	SI	10/25/2020	SI	2	0	13	1	NO	Peru	TUMBES	TUMBES	TUMBES	Mestizo		NO		NO				0	0	0	0	0	0	0	0	0	0	0	0	0	0					0
espr_0975	979	4	2020-06-11	515	1	2	5	0	1	0	SI	10/20/2020	SI	0
espr_0976	980	4	2020-06-11	515	1	2	5	0	1	0	SI	10/20/2020	SI	0
espr_0977	981	2	2020-06-11	408	1	3	4	0	1	0	SI	10/20/2020	SI	0	2	52	0	NO	Peru	TUMBES	TUMBES	TUMBES	Mestizo		NO		NO				0	0	0	0	0	0	0	0	0	0	0	0	0	0	0	0	0		0
espr_0978	982	0	2020-06-11	408	1	3	4	0	1	0	SI	10/20/2020	SI	0	0	15	0	NO	Peru	TUMBES	TUMBES	TUMBES	Mestizo		NO		NO				0	0	0	0	0	0	0	0	0	0	0	0	0	0	0	0	0		0
espr_0979	983	0	2020-06-11	408	1	3	4	0	1	0	SI	10/20/2020	SI	0	0	4	0	NO	Peru	TUMBES	TUMBES	TUMBES	Mestizo		NO		NO				0	0	0	0	0	0	0	0	0	0	0	0	0	0	0	0	0		0
espr_0980	984	4	2020-06-11	406	1	7	6	0	1	0	NO		SI	0
espr_0981	985	2	2020-06-11	406	1	7	6	0	1	0	NO		SI	0	2	39	1	NO	Peru	TUMBES	TUMBES	TUMBES	Mestizo		NO		NO				0	0	0	0	1	0	0	0	0	0	0	0	0	0	0	0	0		0
espr_0982	986	1	2020-06-11	406	1	7	6	0	1	0	NO		SI	0	2	33	0	NO	Peru	TUMBES	TUMBES	TUMBES	Mestizo		NO		SI	11/16/2020			0	0	0	0	0	0	0	0	0	0	0	0	0	0	0	0	0		0
espr_0983	987	0	2020-06-11	406	1	7	6	0	1	0	NO		SI	0	0	11	0	NO	Peru	TUMBES	TUMBES	TUMBES	Mestizo		NO		NO				0	0	0	0	0	0	0	0	0	0	0	0	0	0	0	0	0		0
espr_0984	988	2	2020-06-11	406	1	7	6	0	1	0	NO		SI	0	2	8	1	NO	Peru	TUMBES	TUMBES	TUMBES	Mestizo		NO		NO				0	0	0	0	0	0	0	0	0	0	0	0	0	0	0	0	0		0
espr_0985	989	3	2020-06-11	406	1	7	6	0	1	0	NO		SI	0	2	14	0	NO	Peru	TUMBES	TUMBES	TUMBES	Mestizo		NO		NO				0	0	0	0	0	0	0	0	0	0	0	0	0	0	0	0	0		0
espr_0986	990	0	2020-06-11	406	1	7	6	0	1	0	NO		SI	0	0	6	1	NO	Peru	TUMBES	TUMBES	TUMBES	Mestizo		NO		NO				0	0	0	0	0	0	0	0	0	0	0	0	0	0	0	0	0		0
espr_0987	991	4	2020-06-11	469	1	5	5	0	1	0	NO		SI	0
espr_0988	992	0	2020-06-11	469	1	5	5	0	1	0	NO		SI	0	1	36	0	NO	Peru	TUMBES	TUMBES	TUMBES	Mestizo	11/17/2020	NO		NO				0	0	0	1	0	0	0	0	0	0	0	0	0	0	0	0	0		0
espr_0989	993	4	2020-06-11	469	1	5	5	0	1	0	NO		SI	0
espr_0990	994	4	2020-06-11	469	1	5	5	0	1	0	NO		SI	0
espr_0991	995	4	2020-06-11	469	1	5	5	0	1	0	NO		SI	0
espr_0992	996	2	10/30/2020	397	1	3	4	0	1	0	SI	10/20/2020	SI	0	2	54	1	NO	Peru	TUMBES	TUMBES	TUMBES	Mestizo		NO		SI	11/14/2020			0	0	0	0	0	0	0	0	0	0	0	0	0	0	0	0	0		0
espr_0993	997	0	10/30/2020	397	1	3	4	0	1	0	SI	10/20/2020	SI	0	0	57	0	NO	Peru	TUMBES	TUMBES	TUMBES	Mestizo		NO		NO				0	0	0	0	0	0	0	0	0	0	0	0	0	0	0	0	0		0
espr_0994	998	4	10/30/2020	397	1	3	4	0	1	0	SI	10/20/2020	SI	0
espr_0995	999	4	10/30/2020	419	1	7	4	0	1	0	NO		SI	0
espr_0996	1000	4	10/30/2020	419	1	7	4	0	1	0	NO		SI	0
espr_0997	1001	4	10/30/2020	419	1	7	4	0	1	0	NO		SI	0
espr_0998	1002	4	10/30/2020	419	1	7	4	0	1	0	NO		SI	0
espr_0999	1003	4	10/30/2020	419	1	7	4	0	1	0	NO		SI	0
espr_1000	1004	4	10/30/2020	419	1	7	4	0	1	0	NO		SI	0
espr_1001	1005	4	10/30/2020	419	1	7	4	0	1	0	NO		SI	0
espr_1002	1006	0	10/30/2020	536	1	5	4	0	1	0	SI	10/20/2020	SI	0	2	31	1	NO	Peru	TUMBES	TUMBES	TUMBES	Mestizo	2021-03-01	NO		NO				0	1	1	1	1	0	0	0	0	0	0	0	0	0	0	0	0		0
espr_1003	1007	0	10/30/2020	536	1	5	4	0	1	0	SI	10/20/2020	SI	0	0	27	0	NO	Peru	TUMBES	TUMBES	TUMBES	Mestizo		NO		NO				0	0	0	0	0	0	0	0	0	0	0	0	0	0	0	0	0		0
espr_1004	1008	0	10/30/2020	536	1	5	4	0	1	0	SI	10/20/2020	SI	0	0	11	0	NO	Peru	TUMBES	TUMBES	TUMBES	Mestizo		NO		NO				0	0	0	0	0	0	0	0	0	0	0	0	0	0	0	0	0		0
espr_1005	1009	0	10/30/2020	536	1	5	4	0	1	0	SI	10/20/2020	SI	0	0	8	1	NO	Peru	TUMBES	TUMBES	TUMBES	Mestizo		NO		NO				0	0	0	0	0	0	0	0	0	0	0	0	0	0	0	0	0		0
espr_1006	1010	0	10/30/2020	536	1	5	4	0	1	0	SI	10/20/2020	SI	0	0	3	0	NO	Peru	TUMBES	TUMBES	TUMBES	Mestizo		NO		NO				0	0	0	0	0	0	0	0	0	0	0	0	0	0	0	0	0		0
espr_1007	1011	3	10/29/2020	154	1	5	4	0	1	0	SI	10/20/2020	SI	0	1	38	0		Peru	TUMBES	TUMBES	TUMBES	Mestizo	11/17/2020	NO		NO				0	0	0	1	0	0	0	0	0	0	0	0	0	0	0	0	0
espr_1008	1012	3	10/29/2020	154	1	5	4	0	1	0	SI	10/20/2020	SI	0	2	13	0
espr_1009	1013	3	10/29/2020	154	1	5	4	0	1	0	SI	10/20/2020	SI	0	2	3	1	NO	Peru	TUMBES	TUMBES	TUMBES	Mestizo		NO		NO				0	0	0	0	0	0	0	0	0	0	0	0	0	0	0	0	0		0
espr_1010	1014	4	10/29/2020	154	1	5	4	0	1	0	SI	10/20/2020	SI	0
espr_1011	1015	4	10/29/2020	154	1	5	4	0	1	0	SI	10/20/2020	SI	0
espr_1012	1016	4	10/29/2020	91	1	5	6	0	1	0	SI	10/25/2020	SI	0
espr_1013	1017	0	10/29/2020	91	1	5	6	0	1	0	SI	10/25/2020	SI	0	2	38	0	NO	Peru	TUMBES	TUMBES	TUMBES	Mestizo		NO		NO				0	0	0	0	0	0	0	0	0	0	0	0	0	0					0
espr_1014	1018	4	10/29/2020	91	1	5	6	0	1	0	SI	10/25/2020	SI	0
espr_1015	1019	0	10/29/2020	91	1	5	6	0	1	0	SI	10/25/2020	SI	0	2	23	1	NO	Peru	TUMBES	TUMBES	TUMBES	Mestizo		NO		NO				0	0	0	0	0	0	0	0	0	0	0	0	0	0					0
espr_1016	1020	4	10/29/2020	91	1	5	6	0	1	0	SI	10/25/2020	SI	0
espr_1017	1021	4	10/29/2020	56	1	6	5	0	1	0	SI	10/20/2020	SI	0
espr_1018	1022	0	10/29/2020	56	1	6	5	0	1	0	SI	10/20/2020	SI	0	0	38	0	SI	Peru	TUMBES	TUMBES	TUMBES	Mestizo		NO		NO				0	0	0	0	0	0	0	0	0	0	0	0	0	0	0	0	0		0
espr_1019	1023	0	10/29/2020	56	1	6	5	0	1	0	SI	10/20/2020	SI	0	0	16	0		Peru	TUMBES	TUMBES	TUMBES	Mestizo		NO		NO				0	0	0	0	0	0	0	0	0	0	0	0	0	0	0	0	0	0	0
espr_1020	1024	0	10/29/2020	56	1	6	5	0	1	0	SI	10/20/2020	SI	0	0	7	0		Peru	TUMBES	TUMBES	TUMBES	Mestizo		NO		NO				0	0	0	0	0	0	0	0	0	0	0	0	0	0	0	0	0	0	0
espr_1021	1025	0	10/29/2020	56	1	6	5	0	1	0	SI	10/20/2020	SI	0	0	5	0		Peru	TUMBES	TUMBES	TUMBES	Mestizo		NO		NO				0	0	0	0	0	0	0	0	0	0	0	0	0	0	0	0	0	0	0
espr_1022	1026	0	10/29/2020	56	1	6	5	0	1	0	SI	10/20/2020	SI	0	0	3	0		Peru	TUMBES	TUMBES	TUMBES	Mestizo		NO		NO				0	0	0	0	0	0	0	0	0	0	0	0	0	0	0	0	0	0	0
espr_1023	1027	0	10/29/2020	7	1	3	4	0	1	0	NO		SI	0	0	51	1	SI	Peru	TUMBES	TUMBES	TUMBES	Mestizo		NO		NO				0	0	0	0	0	0	0	0	0	0	0	0	0	0	0	0	0		0
espr_1024	1028	0	10/29/2020	7	1	3	4	0	1	0	NO		SI	0	0	25	0	NO	Peru	TUMBES	TUMBES	TUMBES	Mestizo	2020-10-11	NO		NO				1	0	1	0	0	0	0	0	0	0	0	0	0	0	0	0	0		0
espr_1025	1029	0	10/29/2020	7	1	3	4	0	1	0	NO		SI	0	0	5	1		Peru	TUMBES	TUMBES	TUMBES	Mestizo		NO		NO				0	0	0	0	0	0	0	0	0	0	0	0	0	0	0	0	0	0	0
espr_1026	1030	4	10/30/2020	542	1	5	4	0	1	0	SI	10/20/2020	SI	0
espr_1027	1031	0	10/30/2020	542	1	5	4	0	1	0	SI	10/20/2020	SI	0	0	35	0	NO	Peru	TUMBES	TUMBES	TUMBES	Mestizo		NO		NO				1	0	1	0	0	1	0	0	0	0	0	0	0	0	0	0	0		0
espr_1028	1032	0	10/30/2020	542	1	5	4	0	1	0	SI	10/20/2020	SI	0	0	13	1	NO	Peru	TUMBES	TUMBES	TUMBES	Mestizo		NO		NO				0	0	0	0	0	0	0	0	0	0	0	0	0	0	0	0	0		0
espr_1029	1033	0	10/30/2020	542	1	5	4	0	1	0	SI	10/20/2020	SI	0	0	6	1	NO	Peru	TUMBES	TUMBES	TUMBES	Mestizo		NO		NO				0	0	0	0	0	0	0	0	0	0	0	0	0	0	0	0	0		0
espr_1030	1034	4	10/30/2020	542	1	5	4	0	1	0	SI	10/20/2020	SI	0
espr_1031	1035	2	10/31/2020	1241	1	5	6	0	1	0	NO		SI	0	2	54	1	NO	Peru	TUMBES	TUMBES	TUMBES	Mestizo		NO		NO				0	1	1	0	0	0	0	0	0	0	0	0	0	0	1	1	0	Perdida de apetito	0
espr_1032	1036	2	10/31/2020	1241	1	5	6	0	1	0	NO		SI	0	2	46	0	NO	Peru	TUMBES	TUMBES	TUMBES	Mestizo		NO		SI	11/14/2020			0	1	1	0	0	0	0	0	0	0	0	0	0	0	1	1	0		0
espr_1033	1037	0	10/31/2020	1241	1	5	6	0	1	0	NO		SI	0	0	16	1	NO	Peru	TUMBES	TUMBES	TUMBES	Mestizo		NO		NO				0	0	1	0	0	0	0	0	0	0	0	0	0	0	0	0	0		0
espr_1034	1038	0	10/31/2020	1241	1	5	6	0	1	0	NO		SI	0	0	8	1	NO	Peru	TUMBES	TUMBES	TUMBES	Mestizo		NO		NO				0	0	1	0	0	0	0	0	0	0	0	0	0	0	0	0	0		0
espr_1035	1039	2	10/31/2020	1241	1	5	6	0	1	0	NO		SI	0	2	48	0	NO	Peru	TUMBES	TUMBES	TUMBES	Mestizo		NO		NO				0	0	0	0	0	0	0	0	0	0	0	0	0	0	0	0	0		0
espr_1035	1040	3	10/31/2020	1241	1	5	6	0	1	0	NO		SI	0	2	5	1	NO	Peru	TUMBES	TUMBES	TUMBES	Mestizo		NO		NO				0	0	1	0	0	0	0	0	0	0	0	0	0	0	0	0	0		0
espr_1036	1041	0	10/31/2020	1029	1	5	5	0	0	0	NO		SI	0	1	73	1	NO	Peru	TUMBES	TUMBES	CORRALES	Mestizo	2021-05-01	NO		NO				1	1	0	1	0	0	0	0	0	0	0	0	0	0	0	0	0		37
espr_1037	1042	0	10/31/2020	1029	1	5	5	0	0	0	NO		SI	0	0	68	0	NO	Peru	TUMBES	ZARUMILLA	ZARUMILLA	Mestizo	5/16/2020	NO		NO				0	0	1	1	0	1	0	0	1	0	0	0	0	0	0	0	0		37
espr_1038	1043	0	10/31/2020	1029	1	5	5	0	0	0	NO		SI	0	0	51	1	NO	Peru	TUMBES	TUMBES	TUMBES	Mestizo		NO		NO				0	0	0	0	0	0	0	0	0	0	0	0	0	0	0	0	0		0
espr_1039	1044	0	10/31/2020	1029	1	5	5	0	0	0	NO		SI	0	0	35	1	NO	Peru	TUMBES	TUMBES	TUMBES	Mestizo		NO		NO				0	1	0	0	0	0	0	0	0	0	0	0	0	0	0	0	0		0
espr_1040	1045	0	10/31/2020	1029	1	5	5	0	0	0	NO		SI	0	0	28	0	NO	Peru	TUMBES	TUMBES	SAN JUAN DE LA VIRGEN			NO		NO				0	0	0	0	0	0	0	0	0	0	0	0	0	0	0	0	0		0
espr_1041	1046	4	10/31/2020	1025	1	5	5	0	1	0	SI	10/20/2020	SI	0
espr_1042	1047	0	10/31/2020	1025	1	5	5	0	1	0	SI	10/20/2020	SI	0	0	25	0	NO	Peru	TUMBES	TUMBES	TUMBES	Mestizo		DESCONOCIDO		NO				1	0	1	0	0	0	0	0	0	0	0	0	0	0	1	1	0		0
espr_1043	1048	0	10/31/2020	1025	1	5	5	0	1	0	SI	10/20/2020	SI	0	0	7	0	NO	Peru	TUMBES	TUMBES	TUMBES	Mestizo		NO		NO				0	0	0	0	1	0	0	0	0	0	0	0	0	0	0	0	0		0
espr_1044	1049	0	10/31/2020	1025	1	5	5	0	1	0	SI	10/20/2020	SI	0	0	4	1	NO	Peru	TUMBES	TUMBES	TUMBES	Mestizo		NO		NO				1	0	0	0	0	0	0	0	0	0	0	0	0	0	0	0	0		0
espr_1045	1050	4	10/31/2020	1025	1	5	5	0	1	0	SI	10/20/2020	SI	0
espr_1046	1051	4	10/31/2020	1017	1	7	5	0	1	0	SI	10/20/2020	SI	0
espr_1047	1052	0	10/31/2020	1017	1	7	5	0	1	0	SI	10/20/2020	SI	0	0	74	1	NO	Peru	TUMBES	TUMBES	TUMBES	Mestizo		NO		NO				0	0	0	0	0	0	0	0	0	0	0	0	0	0					0
espr_1048	1053	4	10/31/2020	1017	1	7	5	0	1	0	SI	10/20/2020	SI	0
espr_1049	1054	0	10/31/2020	1017	1	7	5	0	1	0	SI	10/20/2020	SI	0	0	26	1	NO	Peru	TUMBES	TUMBES	TUMBES	Mestizo		NO		NO				0	0	0	0	0	0	0	0	0	0	0	0	0	0	0	0	0		0
espr_1050	1055	0	10/31/2020	1017	1	7	5	0	1	0	SI	10/20/2020	SI	0	0	23	0	NO	Peru	TUMBES	TUMBES	TUMBES	Mestizo		NO		NO				0	0	0	0	0	0	0	0	0	0	0	0	0	0					0
espr_1051	1056	0	10/31/2020	1017	1	7	5	0	1	0	SI	10/20/2020	SI	0	0	21	0	NO	Peru	TUMBES	TUMBES	TUMBES	Mestizo		NO		NO				0	0	0	0	0	0	0	0	0	0	0	0	0	0					0
espr_1052	1057	4	10/31/2020	1017	1	7	5	0	1	0	SI	10/20/2020	SI	0
espr_1053	1058	0	10/31/2020	1066	1	7	5	0	1	0	NO		SI	0	1	55	1	NO	Peru	TUMBES	TUMBES	TUMBES	Mestizo	11/18/2020	NO		NO				0	0	0	1	0	0	0	0	0	0	0	0	0	0	0	0	0		0
espr_1054	1059	4	10/31/2020	1066	1	7	5	0	1	0	NO		SI	0
espr_1055	1060	0	10/31/2020	1066	1	7	5	0	1	0	NO		SI	0	0	28	0	NO	Peru	TUMBES	TUMBES	TUMBES	Mestizo		NO		NO				0	0	0	0	0	0	0	0	0	0	0	0	0	0					0
espr_1056	1061	4	10/31/2020	1066	1	7	5	0	1	0	NO		SI	0
espr_1057	1062	0	10/31/2020	1066	1	7	5	0	1	0	NO		SI	0	0	10	0	NO	Peru	TUMBES	TUMBES	TUMBES	Mestizo		NO		NO				0	0	0	0	0	0	0	0	0	0	0	0	0	0					0
espr_1058	1063	0	10/31/2020	1066	1	7	5	0	1	0	NO		SI	0	0	8	0	NO	Peru	TUMBES	TUMBES	TUMBES	Mestizo		NO		NO				0	0	0	0	0	0	0	0	0	0	0	0	0	0					0
espr_1059	1064	0	10/31/2020	1066	1	7	5	0	1	0	NO		SI	0	0	5	1	NO	Peru	TUMBES	TUMBES	TUMBES	Mestizo		NO		NO				0	0	0	0	0	0	0	0	0	0	0	0	0	0					0
espr_1060	1065	0	10/31/2020	1056	1	4	5	0	1	0	NO		SI	0	1	53	1		Peru	TUMBES	TUMBES	TUMBES	Mestizo		NO		NO				0	0	0	0	0	0	0	0	0	0	0	0	0	0	0	0	0	0	0
espr_1061	1066	0	10/31/2020	1056	1	4	5	0	1	0	NO		SI	0	0	50	0	NO	Peru	TUMBES	TUMBES	TUMBES	Mestizo		NO		NO				0	0	0	0	0	0	0	0	0	0	0	0	0	0	0	0	0		0
espr_1062	1067	0	10/31/2020	1056	1	4	5	0	1	0	NO		SI	0	0	2	0	NO	Peru	TUMBES	TUMBES	TUMBES	Mestizo		NO		NO				0	0	0	0	0	0	0	0	0	0	0	0	0	0	0	0	0		0
espr_1063	1068	0	10/31/2020	1056	1	4	5	0	1	0	NO		SI	0	2	17	0	NO	Peru	TUMBES	TUMBES	TUMBES	Mestizo		NO		NO				0	0	0	0	0	0	0	0	0	0	0	0	0	0	0	0	0		0
espr_1064	1069	0	10/31/2020	1049	1	9	5	0	1	0	NO		SI	0	0	61	1	NO	Peru	TUMBES	TUMBES	TUMBES	Mestizo		NO		NO				0	0	0	0	0	0	0	0	0	0	0	0	0	0					0
espr_1065	1070	0	10/31/2020	1049	1	9	5	0	1	0	NO		SI	0	0	48	0	NO	Peru	TUMBES	TUMBES	TUMBES	Mestizo		NO		NO				0	0	0	0	0	0	0	0	0	0	0	0	0	0					0
espr_1066	1071	0	10/31/2020	1049	1	9	5	0	1	0	NO		SI	0	0	17	0	NO	Peru	TUMBES	TUMBES	TUMBES	Mestizo		NO		NO				0	0	0	0	0	0	0	0	0	0	0	0	0	0					0
espr_1067	1072	0	10/31/2020	1049	1	9	5	0	1	0	NO		SI	0	0	17	0	NO	Peru	TUMBES	TUMBES	TUMBES	Mestizo		NO		NO				0	0	0	0	0	0	0	0	0	0	0	0	0	0					0
espr_1068	1073	0	10/31/2020	1049	1	9	5	0	1	0	NO		SI	0	0	54	1	NO	Peru	TUMBES	TUMBES	TUMBES	Mestizo		NO		NO				0	0	0	0	0	0	0	0	0	0	0	0	0	0					0
espr_1069	1074	0	10/31/2020	1049	1	9	5	0	1	0	NO		SI	0	2	30	1	NO	Peru	TUMBES	TUMBES	TUMBES	Mestizo	2020-06-11	NO		NO				1	0	1	0	0	0	0	0	1	0	1	0	0	0	0	0	0	Dolor de espalda	0
espr_1070	1075	0	10/31/2020	1049	1	9	5	0	1	0	NO		SI	0	0	31	0	NO	Peru	TUMBES	TUMBES	TUMBES	Mestizo		NO		NO				0	0	0	0	0	0	0	0	0	0	0	0	0	0					0
espr_1071	1076	0	10/31/2020	1049	1	9	5	0	1	0	NO		SI	0	0	4	1	NO	Peru	TUMBES	TUMBES	TUMBES	Mestizo		NO		NO				0	0	0	0	0	0	0	0	0	0	0	0	0	0					0
espr_1072	1077	0	10/31/2020	1049	1	9	5	0	1	0	NO		SI	0	0	4	1	NO	Peru	TUMBES	TUMBES	TUMBES	Mestizo		NO		NO				0	0	0	0	0	0	0	0	0	0	0	0	0	0					0
espr_1073	1078	0	10/30/2020	468	1	6	5	0	1	0	SI	10/15/2020	NO	0	0	49	1	NO	Peru	TUMBES	TUMBES	TUMBES	Mestizo		NO		NO				0	0	0	0	0	0	0	0	0	0	0	0	0	0	0	0	0		0
espr_1074	1079	3	10/30/2020	468	1	6	5	0	1	0	SI	10/15/2020	NO	0	2	44	0	NO	Peru	TUMBES	TUMBES	TUMBES	Mestizo		NO		NO				1	0	0	0	0	0	0	0	0	0	0	0	0	0	1	1	0		0
espr_1075	1080	0	10/30/2020	468	1	6	5	0	1	0	SI	10/15/2020	NO	0	0	19	1	NO	Peru	TUMBES	TUMBES	TUMBES	Afrodescendiente		NO		NO				0	0	0	0	0	0	0	0	0	0	0	0	0	0					0
espr_1076	1081	3	10/30/2020	468	1	6	5	0	1	0	SI	10/15/2020	NO	0	2	16	0	NO	Peru	TUMBES	TUMBES	TUMBES	Mestizo		NO		NO				0	0	1	0	1	1	0	0	0	0	0	0	0	0	0	0	0		0
espr_1077	1082	0	10/30/2020	468	1	6	5	0	1	0	SI	10/15/2020	NO	0	0	14	1	NO	Peru	TUMBES	TUMBES	TUMBES	Mestizo		NO		NO				0	0	0	0	0	0	0	0	0	0	0	0	0	0	0	0	0		0
espr_1078	1083	3	10/30/2020	468	1	6	5	0	1	0	SI	10/15/2020	NO	0	2	22	1	NO	Peru	TUMBES	TUMBES	TUMBES	Mestizo		NO		NO				0	0	0	0	0	1	0	0	0	0	0	0	0	0	0	0	0		0
espr_1079	1084	2	10/30/2020	401	1	6	2	0	1	0	NO		NO	0	2	81	1	NO	Peru	TUMBES	TUMBES	TUMBES	Mestizo		NO		SI	11/14/2020			0	0	0	0	0	0	0	0	0	0	0	0	0	0	0	0	0		0
espr_1080	1085	4	10/30/2020	401	1	6	2	0	1	0	NO		NO	0
espr_1081	1086	4	10/30/2020	401	1	6	2	0	1	0	NO		NO	0
espr_1082	1087	3	10/30/2020	401	1	6	2	0	1	0	NO		NO	0	2	41	0	NO	Peru	TUMBES	TUMBES	TUMBES	Mestizo		NO		NO				0	0	0	0	0	0	0	0	0	0	0	0	0	0	0	0	0		0
espr_1083	1088	4	10/30/2020	401	1	6	2	0	1	0	NO		NO	0
espr_1084	1089	3	10/30/2020	401	1	6	2	0	1	0	NO		NO	0	2	10	1	NO	Peru	TUMBES	TUMBES	TUMBES	Mestizo		NO		NO				0	0	0	0	0	0	0	0	0	0	0	0	0	0	0	0	0		0
espr_1085	1090	3	10/30/2020	538	1	7	5	0	1	0	NO		NO	0	2	70	0	NO	Peru	TUMBES	TUMBES	TUMBES	Otro		NO		NO				0	0	0	0	0	0	0	0	0	0	0	0	0	0	0	0	0		0
espr_1086	1091	3	10/30/2020	538	1	7	5	0	1	0	NO		NO	0	2	38	1	NO	Peru	TUMBES	TUMBES	TUMBES	Mestizo		NO		NO				0	0	0	0	0	0	0	0	0	0	0	0	0	0					0
espr_1087	1092	3	10/30/2020	538	1	7	5	0	1	0	NO		NO	0	2	8	1	NO	Peru	TUMBES	TUMBES	TUMBES	Mestizo		NO		NO				0	0	0	0	0	0	0	0	0	0	0	0	0	0	0	0	0		0
espr_1088	1093	4	10/30/2020	538	1	7	5	0	1	0	NO		NO	0
espr_1089	1094	2	10/30/2020	538	1	7	5	0	1	0	NO		NO	0	2	27	0		Peru	TUMBES	TUMBES	TUMBES	Mestizo	11/19/2020	NO		NO				0	0	1	0	0	0	0	0	0	0	0	0	0	0	0	0	0		0
espr_1090	1095	0	10/30/2020	538	1	7	5	0	1	0	NO		NO	0	0	56	0	NO	Peru	TUMBES	TUMBES	TUMBES	Mestizo		NO		NO				0	0	0	0	0	0	0	0	0	0	0	0	0	0	0	0	0	0	0
espr_1091	1096	0	10/30/2020	538	1	7	5	0	1	0	NO		NO	0	0	61	0	NO	Peru	TUMBES	TUMBES	TUMBES	Mestizo		NO		NO				0	0	0	0	0	0	0	0	0	0	0	0	0	0	0	0	0		0
espr_1092	1097	1	10/30/2020	568	1	4	2	0	1	0	NO		NO	0	2	39	1	NO	Peru	TUMBES	TUMBES	TUMBES	Mestizo		NO		NO				0	0	0	0	0	0	0	0	0	0	0	0	0	0	0	0	0		0
espr_1093	1098	4	10/30/2020	568	1	4	2	0	1	0	NO		NO	0
espr_1094	1099	4	10/30/2020	568	1	4	2	0	1	0	NO		NO	0
espr_1095	1100	4	10/30/2020	568	1	4	2	0	1	0	NO		NO	0
espr_1096	1101	0	10/29/2020	118	1	9	5	0	1	0	SI	10/19/2020	NO	0	0	53	1	NO	Peru	TUMBES	TUMBES	TUMBES	Mestizo		NO		NO				0	0	0	0	0	0	0	0	0	0	0	0	0	0	0	0	0		0
espr_1097	1102	0	10/29/2020	118	1	9	5	0	1	0	SI	10/19/2020	NO	0	0	48	0	NO	Peru	TUMBES	TUMBES	TUMBES	Mestizo		NO		NO				0	0	0	0	0	0	0	0	0	0	0	0	0	0	0	0	0		0
espr_1098	1103	0	10/29/2020	118	1	9	5	0	1	0	SI	10/19/2020	NO	0	0	17	1	NO	Peru	TUMBES	TUMBES	TUMBES	Mestizo		NO		NO				0	0	0	0	0	0	0	0	0	0	0	0	0	0	0	0	0		0
espr_1099	1104	0	10/29/2020	118	1	9	5	0	1	0	SI	10/19/2020	NO	0	0	27	0	NO	Peru	TUMBES	TUMBES	TUMBES	Mestizo		NO		NO				0	0	0	0	0	0	0	0	0	0	0	0	0	0	0	0	0		0
espr_1100	1105	0	10/29/2020	118	1	9	5	0	1	0	SI	10/19/2020	NO	0	0	12	0	NO	Peru	TUMBES	TUMBES	TUMBES	Mestizo		NO		NO				0	0	0	0	0	0	0	0	0	0	0	0	0	0	0	0	0		0
espr_1101	1106	0	10/29/2020	118	1	9	5	0	1	0	SI	10/19/2020	NO	0	0	10	1	NO	Peru	TUMBES	TUMBES	TUMBES	Mestizo		NO		NO				0	0	0	0	0	0	0	0	0	0	0	0	0	0	0	0	0		0
espr_1102	1107	0	10/29/2020	118	1	9	5	0	1	0	SI	10/19/2020	NO	0	0	9	0	NO	Peru	TUMBES	TUMBES	TUMBES	Mestizo		NO		NO				0	0	0	0	0	0	0	0	0	0	0	0	0	0	0	0	0		0
espr_1103	1108	4	10/29/2020	118	1	9	5	0	1	0	SI	10/19/2020	NO	0
espr_1104	1109	0	10/29/2020	118	1	9	5	0	1	0	SI	10/19/2020	NO	0	0	26	0	NO	Peru	TUMBES	TUMBES	TUMBES	Mestizo		NO		NO				0	0	0	0	0	0	0	0	0	0	0	0	0	0	0	0	0		0
espr_1105	1110	3	10/29/2020	88	1	7	3	0	1	0	SI	10/19/2020	NO	0	2	56	1	NO	Peru	TUMBES	TUMBES	CORRALES	Mestizo	2020-07-06	SI	2020-09-06	SI	2020-09-06	NO		0	1	0	0	0	1	0	0	1	0	0	0	0	0	0	0	0		0
espr_1106	1111	3	10/29/2020	88	1	7	3	0	1	0	SI	10/19/2020	NO	0	2	49	0	NO	Peru	TUMBES	TUMBES	TUMBES	Mestizo		NO		NO				0	1	0	0	0	0	0	0	0	0	0	0	0	0	0	0	0		0
espr_1107	1112	0	10/29/2020	88	1	7	3	0	1	0	SI	10/19/2020	NO	0	0	16	1	NO	Peru	TUMBES	TUMBES	TUMBES	Mestizo		NO		NO				0	1	0	0	0	0	0	0	1	0	0	0	0	0	0	0	0		0
espr_1108	1113	4	10/29/2020	88	1	7	3	0	1	0	SI	10/19/2020	NO	0
espr_1109	1114	0	10/29/2020	88	1	7	3	0	1	0	SI	10/19/2020	NO	0	0	34	0	SI	Peru	TUMBES	TUMBES	TUMBES	Mestizo	2020-10-11	NO		NO				1	0	0	0	1	0	0	0	0	0	0	0	0	0	0	0	0		0
espr_1110	1115	4	10/29/2020	88	1	7	3	0	1	0	SI	10/19/2020	NO	0
espr_1111	1116	4	10/29/2020	88	1	7	3	0	1	0	SI	10/19/2020	NO	0
espr_1112	1117	0	10/29/2020	95	1	5	4	0	1	0	SI	10/19/2020	NO	0	1	55	1	NO	Peru	TUMBES	TUMBES	TUMBES	Mestizo	11/17/2020	NO		NO				0	0	0	1	0	0	0	0	0	0	0	0	0	0	0	0	0		0
espr_1113	1118	0	10/29/2020	95	1	5	4	0	1	0	SI	10/19/2020	NO	0	0	51	0	NO	Peru	TUMBES	TUMBES	TUMBES	Mestizo		NO		NO				0	0	0	0	0	0	0	0	0	0	0	0	0	0	0	0	0		0
espr_1114	1119	3	10/29/2020	95	1	5	4	0	1	0	SI	10/19/2020	NO	0	2	28	0	NO	Peru	TUMBES	TUMBES	TUMBES	Mestizo		NO		NO				1	0	0	0	0	0	0	0	0	0	0	0	0	0	0	1	0	Dolor retrocular	0
espr_1115	1120	0	10/29/2020	95	1	5	4	0	1	0	SI	10/19/2020	NO	0	0	14	1	NO	Peru	TUMBES	TUMBES	TUMBES	Mestizo		NO		NO				0	0	0	0	0	0	0	0	0	0	0	0	0	0	0	0	0		0
espr_1116	1121	3	10/29/2020	95	1	5	4	0	1	0	SI	10/19/2020	NO	0	2	8	1	NO	Peru	TUMBES	TUMBES	TUMBES	Mestizo		NO		NO				0	0	1	0	0	0	0	0	0	0	0	0	0	0	0	0	0		0
espr_1117	1122	4	10/29/2020	37	1	3	4	1	1	0	NO		NO	0
espr_1118	1123	0	10/29/2020	37	1	3	4	1	1	0	NO		NO	0	0	33	0	NO	Peru	TUMBES	TUMBES	TUMBES	Mestizo		NO		NO				0	0	0	0	0	0	0	0	0	0	0	0	0	0	0	0	0		0
espr_1119	1124	0	10/29/2020	37	1	3	4	1	1	0	NO		NO	0	0	4	0	NO	Peru	TUMBES	TUMBES	TUMBES	Mestizo		NO		NO				0	0	0	0	0	0	0	0	0	0	0	0	0	0	0	0	0		0
espr_1120	1125	3	10/29/2020	128	1	2	6	0	1	0	NO		NO	0	2	71	1	NO	Peru	TUMBES	TUMBES	TUMBES	Mestizo		NO		NO				0	0	0	0	0	0	0	0	0	0	0	0	0	0	0	0	0		0
espr_1121	1126	0	10/29/2020	128	1	2	6	0	1	0	NO		NO	0	0	41	1	NO	Peru	TUMBES	TUMBES	TUMBES	Mestizo		NO		NO				0	0	0	0	0	0	0	0	0	0	0	0	0	0	0	0	0		0
espr_1122	1127	0	10/31/2020	1009	1	2	3	0	1	0	SI	10/23/2020	SI	2	1	37	0	NO	Peru	TUMBES	TUMBES	TUMBES	Mestizo	11/18/2020	NO		NO				0	0	0	1	0	0	0	0	0	0	0	0	0	0	0	0	0		0
espr_1123	1128	0	10/31/2020	1009	1	2	3	0	1	0	SI	10/23/2020	SI	2	0	6	0	NO	Peru	TUMBES	TUMBES	TUMBES	Mestizo		NO		NO				0	0	0	0	0	0	0	0	0	0	0	0	0	0					0
espr_1124	1129	3	10/31/2020	1076	1	2	2	0	1	0	SI	10/23/2020	SI	2	2	54	1	NO	Peru	TUMBES	TUMBES	TUMBES		2020-11-11	NO		NO				1	1	1	1	1	0	1	0	1	0	0	0	0	0	0	0	0		39
espr_1125	1130	0	10/31/2020	1076	1	2	2	0	1	0	SI	10/23/2020	SI	2	1	56	0	NO	Peru	TUMBES	TUMBES	TUMBES	Mestizo	11/18/2020	NO		NO				0	0	0	1	0	0	0	0	0	0	0	0	0	0	0	0	0		0
espr_1126	1131	0	10/31/2020	1057	1	3	2	0	1	0	NO		NO	2	0	56	1	SI	Peru	TUMBES	TUMBES	TUMBES	Mestizo		NO		NO				0	0	0	0	0	0	0	0	0	0	0	0	0	0					0
espr_1127	1132	1	10/31/2020	1057	1	3	2	0	1	0	NO		NO	2	2	46	0	SI	Peru	TUMBES	TUMBES	TUMBES	Mestizo	11/18/2020	NO		NO				0	0	0	1	0	0	0	0	0	0	0	0	0	0	0	0	0		0
espr_1128	1133	4	10/31/2020	1057	1	3	2	0	1	0	NO		NO	2
espr_1129	1134	0	10/31/2020	1042	1	3	3	0	1	0	SI	10/23/2020	SI	0	0	51	1	NO	Peru	TUMBES	TUMBES	TUMBES	Mestizo		NO		NO				0	0	0	0	0	0	0	0	0	0	0	0	0	0					0
espr_1130	1135	0	10/31/2020	1042	1	3	3	0	1	0	SI	10/23/2020	SI	0	0	42	0	NO	Peru	TUMBES	TUMBES	TUMBES	Mestizo	11/18/2020	NO		NO				0	0	0	1	0	0	0	0	0	0	0	0	0	0	0	0	0		0
espr_1131	1136	0	10/31/2020	1042	1	3	3	0	1	0	SI	10/23/2020	SI	0	0	17	0	NO	Peru	TUMBES	TUMBES	TUMBES	Mestizo		NO		NO				0	0	0	0	0	0	0	0	0	0	0	0	0	0					0
espr_1132	1137	4	10/31/2020	1084	1	5	3	0	1	0	SI	10/23/2020	SI	0
espr_1133	1138	3	10/31/2020	1084	1	5	3	0	1	0	SI	10/23/2020	SI	0	2	34	0	NO	Peru	TUMBES	TUMBES	TUMBES	Mestizo	2020-09-07	NO		NO				1	1	1	1	1	0	0	0	1	0	0	0	0	0	0	0	0		0
espr_1134	1139	3	10/31/2020	1084	1	5	3	0	1	0	SI	10/23/2020	SI	0	2	14	0	NO	Peru	TUMBES	TUMBES	TUMBES	Mestizo		NO		NO				0	0	0	0	0	0	0	0	0	0	0	0	0	0					0
espr_1135	1140	0	10/31/2020	1084	1	5	3	0	1	0	SI	10/23/2020	SI	0	0	12	0	NO	Peru	TUMBES	TUMBES	TUMBES	Mestizo		NO		NO				0	0	0	0	0	0	0	0	0	0	0	0	0	0					0
espr_1136	1141	3	10/31/2020	1084	1	5	3	0	1	0	SI	10/23/2020	SI	0	2	2	0	NO	Peru	TUMBES	TUMBES	TUMBES	Mestizo		NO		NO				0	0	0	0	0	0	0	0	0	0	0	0	0	0					0
espr_1137	1142	0	10/30/2020	547	1	5	3	0	0	0	NO		NO	0	0	63	1	NO	Peru	TUMBES	TUMBES	TUMBES			NO		NO				0	0	0	0	0	0	0	0	0	0	0	0	0	0	0	0	0		0
espr_1138	1143	3	10/30/2020	547	1	5	3	0	0	0	NO		NO	0	2	57	0	NO	Peru	TUMBES	TUMBES	TUMBES	Mestizo		NO		NO				0	0	0	0	0	0	0	0	0	0	0	0	0	0					0
espr_1139	1144	0	10/30/2020	547	1	5	3	0	0	0	NO		NO	0	0	30	0	NO	Peru	TUMBES	TUMBES	TUMBES	Mestizo		NO		NO				0	0	0	0	0	0	0	0	0	0	0	0	0	0					0
espr_1140	1145	4	10/30/2020	547	1	5	3	0	0	0	NO		NO	0
espr_1141	1146	4	10/30/2020	547	1	5	3	0	0	0	NO		NO	0
espr_1142	1147	4	10/30/2020	472	1	2	3	0	1	0	SI	10/13/2020	SI	0
espr_1143	1148	0	10/30/2020	472	1	2	3	0	1	0	SI	10/13/2020	SI	0	1	29	1	NO	Peru	TUMBES	TUMBES	TUMBES	Mestizo	11/17/2020	NO		NO				0	0	0	1	0	0	0	0	0	0	0	0	0	0	0	0	0		0
espr_1144	1149	0	10/29/2020	158	1	3	3	0	1	0	SI	10/23/2020	SI	0	0	46	1	NO	Peru	TUMBES	TUMBES	TUMBES	Mestizo		NO		NO				0	0	0	0	0	0	0	0	0	0	0	0	0	0	0	0	0		0
espr_1145	1150	0	10/29/2020	158	1	3	3	0	1	0	SI	10/23/2020	SI	0	0	52	0	NO	Peru	TUMBES	TUMBES	TUMBES	Mestizo	2020-08-11	NO		NO				0	0	0	0	1	0	0	0	1	0	1	0	0	0	0	0	0		0
espr_1146	1151	0	10/29/2020	158	1	3	3	0	1	0	SI	10/23/2020	SI	0	0	32	1	NO	Peru	TUMBES	TUMBES	TUMBES	Mestizo		NO		NO				0	0	0	0	0	0	0	0	0	0	0	0	0	0	0	0	0		0
espr_1147	1152	4	10/29/2020	85	1	6	5	0	1	0	SI	10/23/2020	SI	0
espr_1148	1153	4	10/29/2020	85	1	6	5	0	1	0	SI	10/23/2020	SI	0
espr_1149	1154	4	10/29/2020	85	1	6	5	0	1	0	SI	10/23/2020	SI	0
espr_1150	1155	4	10/29/2020	85	1	6	5	0	1	0	SI	10/23/2020	SI	0
espr_1151	1156	4	10/29/2020	85	1	6	5	0	1	0	SI	10/23/2020	SI	0
espr_1152	1157	4	10/29/2020	85	1	6	5	0	1	0	SI	10/23/2020	SI	0
espr_1153	1158	0	10/29/2020	59	1	4	3	0	0	0	SI	10/23/2020	SI	0	1	57	1	NO	Peru	TUMBES	TUMBES	TUMBES	Mestizo	2020-10-11	NO		NO				1	0	1	0	0	0	0	0	0	0	0	0	0	0	0	0	0		0
espr_1154	1159	0	10/29/2020	59	1	4	3	0	0	0	SI	10/23/2020	SI	0	0	55	0	NO	Peru	TUMBES	TUMBES	TUMBES	Mestizo		NO		NO				1	1	0	0	0	0	0	0	0	0	0	0	0	0	0	0	0		0
espr_1155	1160	0	10/29/2020	59	1	4	3	0	0	0	SI	10/23/2020	SI	0	0	31	0	NO	Peru	TUMBES	TUMBES	TUMBES	Mestizo		NO		NO				0	1	0	0	0	0	0	0	0	0	0	0	0	0	0	0	0		0
espr_1156	1161	0	10/29/2020	59	1	4	3	0	0	0	SI	10/23/2020	SI	0	0	9	0	NO	Peru	TUMBES	TUMBES	TUMBES	Mestizo		NO		NO				0	0	0	0	0	0	0	0	0	0	0	0	0	0	0	0	0		0
espr_1157	1162	0	10/29/2020	23	1	3	3	0	1	0	SI	10/23/2020	SI	0	0	22	1	NO	Peru	TUMBES	TUMBES	TUMBES	Mestizo		NO		NO				0	0	0	0	0	0	0	0	0	0	0	0	0	0	0	0	0		0
espr_1158	1163	0	10/29/2020	23	1	3	3	0	1	0	SI	10/23/2020	SI	0	0	23	0	NO	Peru	TUMBES	TUMBES	TUMBES	Mestizo		NO		NO				0	0	0	0	0	0	0	0	0	0	0	0	0	0	0	0	0		0
espr_1159	1164	0	10/29/2020	23	1	3	3	0	1	0	SI	10/23/2020	SI	0	0	5	0	NO	Peru	TUMBES	TUMBES	TUMBES	Mestizo		NO		NO				0	0	0	0	0	0	0	0	0	0	0	0	0	0	0	0	0		0
espr_1160	1165	0	10/30/2020	523	1	6	4	0	1	0	SI	10/15/2020	SI	0	0	53	1	NO	Peru	TUMBES	TUMBES	TUMBES	Mestizo		NO		NO				0	0	0	0	1	0	0	0	0	0	0	0	0	0	0	0	0		0
espr_1161	1166	0	10/30/2020	523	1	6	4	0	1	0	SI	10/15/2020	SI	0	0	46	0	NO	Peru	TUMBES	TUMBES	TUMBES	Mestizo		NO		NO				0	0	0	0	1	0	0	0	0	0	0	0	0	0	0	0	0		0
espr_1162	1167	4	10/30/2020	523	1	6	4	0	1	0	SI	10/15/2020	SI	0
espr_1163	1168	0	10/30/2020	523	1	6	4	0	1	0	SI	10/15/2020	SI	0	1	21	0	NO	Peru	TUMBES	TUMBES	TUMBES	Mestizo	11/19/2020	NO		NO				0	0	0	1	1	0	0	0	1	0	0	0	0	0	0	0	0		0
espr_1164	1169	0	10/30/2020	523	1	6	4	0	1	0	SI	10/15/2020	SI	0	0	19	1	NO	Peru	TUMBES	TUMBES	TUMBES		2020-09-06	NO		NO				1	1	1	1	0	1	1	0	0	0	0	0	0	0	1	1	0		0
espr_1165	1170	4	10/30/2020	523	1	6	4	0	1	0	SI	10/15/2020	SI	0
espr_1166	1171	4	10/30/2020	504	1	4	5	0	1	0	SI	10/15/2020	SI	0
espr_1167	1172	4	10/30/2020	504	1	4	5	0	1	0	SI	10/15/2020	SI	0
espr_1168	1173	0	10/30/2020	504	1	4	5	0	1	0	SI	10/15/2020	SI	0	0	33	1	NO	Peru	TUMBES	TUMBES	TUMBES	Mestizo		NO		NO				0	0	0	0	0	0	0	0	0	0	0	0	0	0					0
espr_1169	1174	4	10/30/2020	504	1	4	5	0	1	0	SI	10/15/2020	SI	0
espr_1170	1175	4	10/30/2020	440	1	6	6	0	1	0	SI	10/15/2020	SI	0
espr_1171	1176	4	10/30/2020	440	1	6	6	0	1	0	SI	10/15/2020	SI	0
espr_1172	1177	0	10/30/2020	440	1	6	6	0	1	0	SI	10/15/2020	SI	0	0	35	0	NO	Peru	TUMBES	TUMBES	TUMBES	Mestizo		NO		NO				0	0	0	0	0	0	0	0	0	0	0	0	0	0					0
espr_1173	1178	2	10/30/2020	440	1	6	6	0	1	0	SI	10/15/2020	SI	0	2	38	1	NO	Peru	TUMBES	TUMBES	TUMBES	Mestizo		NO		SI	11/23/2020			0	0	0	0	0	0	0	0	0	0	0	0	0	0					0
espr_1174	1179	0	10/30/2020	440	1	6	6	0	1	0	SI	10/15/2020	SI	0	0	11	1	NO	Peru	TUMBES	TUMBES	TUMBES	Mestizo		NO		NO				0	0	0	0	0	0	0	0	0	0	0	0	0	0					0
espr_1175	1180	0	10/30/2020	440	1	6	6	0	1	0	SI	10/15/2020	SI	0	0	6	0	NO	Peru	TUMBES	TUMBES	TUMBES	Mestizo		NO		NO				0	0	0	0	0	0	0	0	0	0	0	0	0	0					0
espr_1176	1181	3	10/30/2020	418	1	8	3	0	1	0	SI	10/15/2020	SI	0	2	44	1	NO	Peru	TUMBES	TUMBES	TUMBES	Mestizo		NO		NO				1	1	1	0	0	0	0	0	0	0	0	0	0	0	0	0	0		0
espr_1177	1182	3	10/30/2020	418	1	8	3	0	1	0	SI	10/15/2020	SI	0	2	40	0		Peru	TUMBES	TUMBES	TUMBES	Mestizo	11/17/2020	NO		NO				0	0	1	1	0	0	0	0	0	0	0	0	0	0	0	0	0		0
espr_1178	1183	0	10/30/2020	418	1	8	3	0	1	0	SI	10/15/2020	SI	0	2	23	1	NO	Peru	TUMBES	TUMBES	TUMBES		4/18/2020	NO		NO				1	0	1	1	1	1	0	0	1	0	0	0	0	0	0	0	0		0
espr_1179	1184	3	10/30/2020	418	1	8	3	0	1	0	SI	10/15/2020	SI	0	2	22	0	NO	Peru	TUMBES	TUMBES	TUMBES	Mestizo		NO		NO				0	0	1	1	0	0	0	0	0	0	0	0	0	0	0	0	0		0
espr_1180	1185	2	10/30/2020	418	1	8	3	0	1	0	SI	10/15/2020	SI	0	2	20	0	NO	Peru	TUMBES	TUMBES	TUMBES	Mestizo		NO		NO				0	0	1	1	0	0	0	0	0	0	0	0	0	0	0	0	0		0
espr_1181	1186	3	10/30/2020	418	1	8	3	0	1	0	SI	10/15/2020	SI	0	2	14	0	NO	Peru	TUMBES	TUMBES	TUMBES	Mestizo		NO		NO				0	0	1	1	0	0	0	0	0	0	0	0	0	0	0	0	0		0
espr_1182	1187	4	10/30/2020	418	1	8	3	0	1	0	SI	10/15/2020	SI	0
espr_1183	1188	4	10/30/2020	418	1	8	3	0	1	0	SI	10/15/2020	SI	0
espr_1184	1189	0	10/29/2020	68	1	4	4	0	1	0	SI	10/15/2020	SI	0	0	48	1	NO	Peru	TUMBES	TUMBES	TUMBES	Mestizo		NO		NO				0	0	0	0	0	0	0	0	0	0	0	0	0	0	0	0	0		0
espr_1185	1190	4	10/29/2020	68	1	4	4	0	1	0	SI	10/15/2020	SI	0
espr_1186	1191	0	10/29/2020	68	1	4	4	0	1	0	SI	10/15/2020	SI	0	0	26	1	NO	Peru	TUMBES	TUMBES	TUMBES			NO		NO				0	0	0	0	0	0	0	0	0	0	0	0	0	0	0	0	0		0
espr_1187	1192	4	10/29/2020	68	1	4	4	0	1	0	SI	10/15/2020	SI	0
espr_1188	1193	0	10/29/2020	79	1	1	3	1	1	0	NO		SI	2	2	56	0	NO	Peru	TUMBES	TUMBES	TUMBES	Mestizo	7/28/2020	NO		NO				0	0	0	0	0	1	0	0	0	0	0	0	0	0	0	0	0		0
espr_1189	1194	0	10/29/2020	75	1	5	4	0	1	0	SI	10/15/2020	SI	0	0	44	1	NO	Peru	TUMBES	TUMBES	TUMBES	Mestizo		NO		NO				0	0	0	0	0	1	0	0	0	0	0	0	0	0	0	0	0		0
espr_1190	1195	0	10/29/2020	75	1	5	4	0	1	0	SI	10/15/2020	SI	0	0	32	0	NO	Peru	TUMBES	TUMBES	TUMBES	Mestizo		NO		NO				0	0	1	0	1	0	0	0	0	0	0	0	0	0	0	0	0		0
espr_1191	1196	0	10/29/2020	75	1	5	4	0	1	0	SI	10/15/2020	SI	0	0	9	0	NO	Peru	TUMBES	TUMBES	TUMBES	Mestizo		NO		NO				0	0	0	0	0	0	0	0	0	0	0	0	0	0	0	0	0		0
espr_1192	1197	0	10/29/2020	75	1	5	4	0	1	0	SI	10/15/2020	SI	0	0	7	1	NO	Peru	TUMBES	TUMBES	TUMBES	Mestizo		NO		NO				0	0	0	0	0	0	0	0	0	0	0	0	0	0	0	0	0		0
espr_1193	1198	0	10/29/2020	75	1	5	4	0	1	0	SI	10/15/2020	SI	0	0	2	0	NO	Peru	TUMBES	TUMBES	TUMBES	Mestizo		NO		NO				0	0	0	0	0	0	0	0	0	0	0	0	0	0	0	0	0		0
espr_1194	1199	0	10/29/2020	17	1	4	3	0	1	0	SI	10/15/2020	SI	0	0	47	1	NO	Peru	TUMBES	TUMBES	TUMBES	Mestizo		NO		NO				0	0	1	0	0	0	0	0	0	0	0	0	0	0	0	0	0		0
espr_1195	1200	0	10/29/2020	17	1	4	3	0	1	0	SI	10/15/2020	SI	0	0	36	0	NO	Peru	TUMBES	TUMBES	TUMBES	Mestizo		NO		NO				0	0	0	0	0	0	0	0	0	0	0	0	0	0	0	0	0		0
espr_1196	1201	0	10/29/2020	17	1	4	3	0	1	0	SI	10/15/2020	SI	0	0	11	0	NO	Peru	TUMBES	TUMBES	TUMBES	Mestizo		NO		NO				0	0	0	0	0	0	0	0	0	0	0	0	0	0					0
espr_1197	1202	0	10/29/2020	17	1	4	3	0	1	0	SI	10/15/2020	SI	0	0	2	0	NO	Peru	TUMBES	TUMBES	TUMBES	Mestizo		NO		NO				0	0	0	0	0	0	0	0	0	0	0	0	0	0	0	0	0		0
espr_1198	1203	4	10/29/2020	125	1	5	4	0	1	0	NO		SI	0
espr_1199	1204	4	10/29/2020	125	1	5	4	0	1	0	NO		SI	0
espr_1200	1205	0	10/29/2020	125	1	5	4	0	1	0	NO		SI	0	0	20	0	SI	Peru	TUMBES	TUMBES	TUMBES	Mestizo		NO		NO				0	0	0	0	0	0	0	0	0	0	0	0	0	0	0	0	0		0
espr_1201	1206	4	10/29/2020	125	1	5	4	0	1	0	NO		SI	0
espr_1202	1207	0	10/29/2020	125	1	5	4	0	1	0	NO		SI	0	0	8	1		Peru	TUMBES	TUMBES	TUMBES	Mestizo		NO		NO				0	0	0	0	0	0	0	0	0	0	0	0	0	0	0	0	0	0	0
espr_1203	1208	0	10/31/2020	545	1	4	6	0	1	0	SI	10/20/2020	SI	2	0	85	0	NO	Peru	TUMBES	TUMBES	TUMBES	Mestizo		NO		NO				0	0	0	0	0	0	0	0	0	0	0	0	0	0					0
espr_1204	1209	0	10/31/2020	545	1	4	6	0	1	0	SI	10/20/2020	SI	2	0	83	1	NO	Peru	TUMBES	TUMBES	TUMBES	Mestizo		NO		NO				0	0	0	0	0	0	0	0	0	0	0	0	0	0					0
espr_1205	1210	4	10/31/2020	545	1	4	6	0	1	0	SI	10/20/2020	SI	2
espr_1206	1211	0	10/31/2020	545	1	4	6	0	1	0	SI	10/20/2020	SI	2	0	54	0	NO	Peru	TUMBES	TUMBES	TUMBES	Mestizo		NO		NO				0	0	0	0	0	0	0	0	0	0	0	0	0	0					0
espr_1207	1212	2	10/31/20	533	1	1	3	0	1	0	NO		SI	0	2	66	0	NO	Peru	TUMBES	TUMBES	TUMBES	Mestizo		NO		SI	11/20/2020			0	0	0	0	0	0	0	0	0	0	0	0	0	0	0	0	0		0
espr_1208	1213	4	10/29/2020	66	1	4	3	0	1	0	SI	10/15/2020	SI	0
espr_1209	1214	0	10/29/2020	66	1	4	3	0	1	0	SI	10/15/2020	SI	0	0	53	0	NO	Peru	TUMBES	TUMBES	TUMBES	Mestizo		NO		NO				0	0	0	0	0	0	0	0	0	0	0	0	0	0	0	0	0		0
espr_1210	1215	4	10/29/2020	66	1	4	3	0	1	0	SI	10/15/2020	SI	0
espr_1211	1216	0	10/29/2020	66	1	4	3	0	1	0	SI	10/15/2020	SI	0	0	12	1	NO	Peru	TUMBES	TUMBES	TUMBES	Mestizo		NO		NO				0	0	0	0	0	0	0	0	0	0	0	0	0	0	0	0	0		0
espr_1212	1217	0	10/29/2020	84	1	6	3	0	1	0	SI	10/15/2020	SI	0	0	58	1	NO	Peru	TUMBES	ZARUMILLA	ZARUMILLA			NO		NO				0	0	0	0	0	0	0	0	0	0	0	0	0	0					0
espr_1213	1218	0	10/29/2020	84	1	6	3	0	1	0	SI	10/15/2020	SI	0	0	48	0	NO	Peru	TUMBES	TUMBES	TUMBES	Mestizo		NO		NO				0	0	0	0	0	0	0	0	0	0	0	0	0	0	0	0	0		0
espr_1214	1219	0	10/29/2020	84	1	6	3	0	1	0	SI	10/15/2020	SI	0	0	21	0	NO	Peru	TUMBES	TUMBES	TUMBES	Mestizo		NO		NO				0	0	0	0	0	0	0	0	0	0	0	0	0	0	0	0	0		0
espr_1215	1220	4	10/29/2020	84	1	6	3	0	1	0	SI	10/15/2020	SI	0
espr_1216	1221	0	10/29/2020	84	1	6	3	0	1	0	SI	10/15/2020	SI	0	0	15	1	NO	Peru	TUMBES	TUMBES	TUMBES	Mestizo		NO		NO				0	0	0	0	0	0	0	0	0	0	0	0	0	0	0	0	0		0
espr_1217	1222	0	10/29/2020	84	1	6	3	0	1	0	SI	10/15/2020	SI	0	0	3	0	NO	Peru	TUMBES	TUMBES	TUMBES	Mestizo		NO		NO				0	0	0	0	0	0	0	0	0	0	0	0	0	0	0	0	0		0
espr_1218	1223	0	10/29/2020	50	1	4	5	0	1	0	NO		SI	0	0	50	1	NO	Peru	TUMBES	TUMBES	TUMBES	Mestizo		NO		NO				0	0	0	0	0	0	0	0	0	0	0	0	0	0	0	0	0		0
espr_1219	1224	0	10/29/2020	50	1	4	5	0	1	0	NO		SI	0	0	36	0	NO	Peru	TUMBES	TUMBES	TUMBES	Mestizo		NO		NO				0	0	0	0	0	0	0	0	0	0	0	0	0	0	0	0	0		0
espr_1220	1225	0	10/29/2020	50	1	4	5	0	1	0	NO		SI	0	0	11	1	NO	Peru	TUMBES	TUMBES	TUMBES	Mestizo		NO		NO				0	0	0	0	0	0	0	0	0	0	0	0	0	0	0	0	0		0
espr_1221	1226	0	10/29/2020	50	1	4	5	0	1	0	NO		SI	0	0	7	0	NO	Peru	TUMBES	TUMBES	TUMBES	Mestizo		NO		NO				0	0	0	0	0	0	0	0	0	0	0	0	0	0	0	0	0		0
espr_1222	1227	0	10/29/2020	36	1	1	3	0	1	0	NO		SI	0	0	27	1	NO	Peru	TUMBES	TUMBES	TUMBES	Mestizo		NO		NO				0	0	0	0	0	0	0	0	0	0	0	0	0	0	0	0	0		0
espr_1223	1228	4	10/30/2020	391	1	4	5	0	0	0	SI	10/15/2020	SI	0
espr_1224	1229	0	10/30/2020	391	1	4	5	0	0	0	SI	10/15/2020	SI	0	0	43	0	NO	Peru	TUMBES	TUMBES	TUMBES	Mestizo		NO		NO				0	1	1	0	0	0	0	0	0	0	0	0	0	0	1	1	0		0
espr_1225	1230	4	10/30/2020	391	1	4	5	0	0	0	SI	10/15/2020	SI	0
espr_1226	1231	0	10/30/2020	391	1	4	5	0	0	0	SI	10/15/2020	SI	0	0	11	1	NO	Peru	TUMBES	TUMBES	TUMBES	Mestizo		NO		NO				0	1	0	0	0	0	0	0	0	0	0	0	0	0	1	1	0		0
espr_1227	1232	0	10/29/2020	32	1	4	5	0	1	0	SI	10/15/2020	SI	0	1	35	1	NO	Peru	TUMBES	TUMBES	TUMBES	Mestizo	2020-10-11	NO		NO				0	0	1	0	0	0	0	0	0	0	0	0	0	0	0	0	0		0
espr_1228	1233	0	10/29/2020	32	1	4	5	0	1	0	SI	10/15/2020	SI	0	0	36	0	NO	Peru	TUMBES	TUMBES	TUMBES	Mestizo		NO		NO				0	0	0	0	0	0	0	0	0	0	0	0	0	0	0	0	0		0
espr_1229	1234	0	10/29/2020	32	1	4	5	0	1	0	SI	10/15/2020	SI	0	0	13	1	NO	Peru	TUMBES	TUMBES	TUMBES	Mestizo		NO		NO				0	0	0	0	0	0	0	0	0	0	0	0	0	0					0
espr_1230	1235	0	10/29/2020	32	1	4	5	0	1	0	SI	10/15/2020	SI	0	0	6	0	NO	Peru	TUMBES	TUMBES	TUMBES	Mestizo		NO		NO				0	0	0	0	0	0	0	0	0	0	0	0	0	0					0
espr_1231	1236	4	11/25/2020	1178	1	4	2	0	1	0	NO		NO	2
espr_1232	1237	0	11/25/2020	1178	1	4	2	0	1	0	NO		NO	2	0	20	1	NO	Peru	TUMBES	TUMBES	TUMBES	Mestizo		NO		NO				0	0	0	0	0	0	0	0	0	0	0	0	0	0	0	0	0		0
espr_1233	1238	4	11/25/2020	1178	1	4	2	0	1	0	NO		NO	2
espr_1234	1239	0	11/25/2020	1178	1	4	2	0	1	0	NO		NO	2	0	44	0	SI	Peru	TUMBES	TUMBES	TUMBES	Mestizo		NO		NO				0	0	0	0	0	0	0	0	0	0	0	0	0	0	0	0	0		0
espr_1235	1240	0	11/25/2020	1186	2	3	2	0	1	0	NO		NO	0	0	46	1	NO	Peru	TUMBES	TUMBES	TUMBES	Mestizo		NO		NO				0	0	0	0	0	0	0	0	0	0	0	0	0	0	0	0	0		0
espr_1236	1241	3	11/25/2020	1186	2	3	2	0	1	0	NO		NO	0	2	44	1	NO	Peru	TUMBES	TUMBES	TUMBES	Mestizo		NO		NO				0	0	0	0	0	0	0	0	0	0	0	0	0	0	0	0	0		0
espr_1237	1242	0	11/25/2020	1186	2	3	2	0	1	0	NO		NO	0	0	24	1	NO	Peru	TUMBES	TUMBES	TUMBES	Mestizo		NO		NO				0	0	0	0	0	0	0	0	0	0	0	0	0	0	0	0	0		0
espr_1238	1243	0	11/25/2020	1189	1	3	1	0	1	0	NO		NO	0	0	28	0	NO	Peru	TUMBES	TUMBES	TUMBES	Mestizo		NO		NO				0	0	0	0	0	0	0	0	0	0	0	0	0	0	0	0	0		0
espr_1239	1244	0	11/25/2020	1189	1	3	1	0	1	0	NO		NO	0	0	4	1		Peru	TUMBES	TUMBES	TUMBES	Mestizo		NO		NO				0	0	0	0	0	0	0	0	0	0	0	0	0	0	0	0	0	0	0
espr_1240	1245	4	11/25/2020	1189	1	3	1	0	1	0	NO		NO	0
espr_1241	1246	4	11/25/2020	1209	1	3	5	0	1	0	SI	11/15/2020	SI	0
espr_1242	1247	0	11/25/2020	1209	1	3	5	0	1	0	SI	11/15/2020	SI	0	0	18	0	NO	Peru	TUMBES	TUMBES	TUMBES	Mestizo		NO		NO				0	0	0	0	0	0	0	0	0	0	0	0	0	0	0	0	0		0
espr_1243	1248	0	11/25/2020	1209	1	3	5	0	1	0	SI	11/15/2020	SI	0	0	39	0	SI	Peru	TUMBES	TUMBES	TUMBES	Mestizo		NO		NO				0	0	0	0	0	0	0	0	0	0	0	0	0	0					0
espr_1244	1249	0	11/25/2020	1285	1	3	1	0	0	0	NO		NO	0	1	24	1	NO	Peru	TUMBES	TUMBES	TUMBES	Mestizo		NO		NO				0	0	0	0	0	0	0	0	0	0	0	0	0	0	0	0	0		0
espr_1245	1250	0	11/25/2020	1285	1	3	1	0	0	0	NO		NO	0	0	20	0	NO	Peru	TUMBES	TUMBES	TUMBES	Mestizo		NO		NO				0	0	0	0	0	0	0	0	0	0	0	0	0	0	0	0	0		0
espr_1246	1251	4	11/25/2020	1285	1	3	1	0	0	0	NO		NO	0
espr_1247	1252	0	11/25/2020	1302	1	4	5	0	1	0	NO		NO	0	0	35	1	NO	Peru	TUMBES	TUMBES	TUMBES	Mestizo		NO		NO				0	0	0	0	0	0	0	0	0	0	0	0	0	0	0	0	0		0
espr_1248	1253	0	11/25/2020	1302	1	4	5	0	1	0	NO		NO	0	0	31	0	NO	Peru	TUMBES	TUMBES	TUMBES	Mestizo		NO		NO				0	0	0	0	0	0	0	0	0	0	0	0	0	0	0	0	0		0
espr_1249	1254	0	11/25/2020	1302	1	4	5	0	1	0	NO		NO	0	0	14	1	NO	Peru	TUMBES	TUMBES	TUMBES	Mestizo		NO		NO				0	0	0	0	0	0	0	0	0	0	0	0	0	0	0	0	0		0
espr_1250	1255	0	11/25/2020	1302	1	4	5	0	1	0	NO		NO	0	0	5	1	NO	Peru	TUMBES	TUMBES	TUMBES	Mestizo		NO		NO				0	0	0	0	0	0	0	0	0	0	0	0	0	0	0	0	0		0
espr_1251	1256	4	11/25/2020	1304	1	6	4	0	1	0	NO		NO	2
espr_1252	1257	3	11/25/2020	1304	1	6	4	0	1	0	NO		NO	2	2	36	0		Peru	TUMBES	TUMBES	TUMBES	Mestizo		NO		NO				0	0	0	0	0	0	0	0	0	0	0	0	0	0	0	0	0	0	0
espr_1253	1258	0	11/25/2020	1304	1	6	4	0	1	0	NO		NO	2	0	17	0	SI	Peru	TUMBES	TUMBES	TUMBES	Mestizo		NO		NO				0	0	0	0	0	0	0	0	0	0	0	0	0	0	0	0	0		0
espr_1254	1259	0	11/25/2020	1304	1	6	4	0	1	0	NO		NO	2	0	15	1	SI	Peru	TUMBES	TUMBES	TUMBES	Mestizo		NO		NO				0	0	0	0	0	0	0	0	0	0	0	0	0	0	0	0	0		0
espr_1255	1260	0	11/25/2020	1304	1	6	4	0	1	0	NO		NO	2	0	14	0		Peru	TUMBES	TUMBES	TUMBES	Mestizo		NO		NO				0	0	0	0	0	0	0	0	0	0	0	0	0	0	0	0	0	0	0
espr_1256	1261	0	11/25/2020	1304	1	6	4	0	1	0	NO		NO	2	0	32	1	SI	Peru	TUMBES	TUMBES	TUMBES	Mestizo		NO		NO				0	0	0	0	0	0	0	0	0	0	0	0	0	0	0	0	0		0
espr_1257	1262	0	11/24/2020	1309	1	4	5	0	1	0	SI	2020-11-07	SI	2	0	43	1	NO	Peru	TUMBES	TUMBES	TUMBES	Mestizo		NO		NO				0	0	0	0	0	0	0	0	0	0	0	0	0	0	0	0	0		0
espr_1258	1263	0	11/24/2020	1309	1	4	5	0	1	0	SI	2020-11-07	SI	2	0	26	0	NO	Peru	TUMBES	TUMBES	TUMBES	Mestizo		NO		NO				0	0	0	0	0	0	0	0	0	0	0	0	0	0	0	0	0		0
espr_1259	1264	0	11/24/2020	1309	1	4	5	0	1	0	SI	2020-11-07	SI	2	0	7	1	NO	Peru	TUMBES	TUMBES	TUMBES	Mestizo		NO		NO				0	0	0	0	0	0	0	0	0	0	0	0	0	0	0	0	0		0
espr_1260	1265	0	11/24/2020	1309	1	4	5	0	1	0	SI	2020-11-07	SI	2	0	67	0	NO	Peru	TUMBES	TUMBES	TUMBES	Mestizo		NO		NO				0	0	0	0	0	0	0	0	0	0	0	0	0	0	0	0	0		0
espr_1261	1266	0	11/25/2020	1316	1	4	1	0	1	0	NO		SI	0	0	21	1	SI	Peru	TUMBES	TUMBES	TUMBES	Mestizo		NO		NO				0	0	0	0	0	0	0	0	0	0	0	0	0	0	0	0	0		0
espr_1262	1267	0	11/25/2020	1316	1	4	1	0	1	0	NO		SI	0	0	18	0	NO	Peru	TUMBES	TUMBES	TUMBES	Mestizo		NO		NO				0	0	0	0	0	0	0	0	0	0	0	0	0	0	0	0	0		0
espr_1263	1268	4	11/25/2020	1316	1	4	1	0	1	0	NO		SI	0
espr_1264	1269	0	11/25/2020	1316	1	4	1	0	1	0	NO		SI	0	0	15	0	SI	Peru	TUMBES	TUMBES	TUMBES	Mestizo		NO		NO				0	0	0	0	0	0	0	0	0	0	0	0	0	0	0	0	0		0
espr_1265	1270	0	11/24/2020	1322	1	4	5	0	1	0	SI	11/18/2020	SI	0	0	42	0	NO	Peru	TUMBES	TUMBES	TUMBES	Mestizo	10/19/2020	NO		NO				0	0	0	1	0	0	0	0	0	0	0	0	0	0	0	0	0		0
espr_1266	1271	0	11/24/2020	1322	1	4	5	0	1	0	SI	11/18/2020	SI	0	0	14	1	NO	Peru	TUMBES	TUMBES	TUMBES	Mestizo		NO		NO				0	0	0	0	0	0	0	0	0	0	0	0	0	0					0
espr_1267	1272	0	11/24/2020	1322	1	4	5	0	1	0	SI	11/18/2020	SI	0	0	10	0	NO	Peru	TUMBES	TUMBES	TUMBES	Mestizo		NO		NO				0	0	0	0	0	0	0	0	0	0	0	0	0	0	0	0	0		0
espr_1268	1273	0	11/24/2020	1322	1	4	5	0	1	0	SI	11/18/2020	SI	0	0	3	1	NO	Peru	TUMBES	TUMBES	TUMBES	Mestizo		NO		NO				0	0	0	0	0	0	0	0	0	0	0	0	0	0	0	0	0		0
espr_1269	1274	0	11/24/2020	1339	1	2	2	1	1	0	NO		NO	2	0	31	1	SI	Peru	TUMBES	TUMBES	TUMBES	Mestizo		NO		NO				0	0	0	0	0	0	0	0	0	0	0	0	0	0	0	0	0		0
espr_1270	1275	0	11/24/2020	1339	1	2	2	1	1	0	NO		NO	2	0	41	0	SI	Peru	TUMBES	TUMBES	TUMBES	Mestizo		NO		NO				0	0	0	0	0	0	0	0	0	0	0	0	0	0	0	0	0		0
espr_1271	1276	0	11/23/2020	1347	1	3	4	0	1	0	NO		SI	0	0	35	0	NO	Peru	TUMBES	TUMBES	TUMBES	Mestizo		NO		NO				0	0	0	0	0	0	0	0	0	0	0	0	0	0					0
espr_1272	1277	0	11/23/2020	1347	1	3	4	0	1	0	NO		SI	0	0	10	1	NO	Peru	TUMBES	TUMBES	TUMBES	Mestizo		NO		NO				0	0	0	0	0	0	0	0	0	0	0	0	0	0					0
espr_1273	1278	0	11/23/2020	1347	1	3	4	0	1	0	NO		SI	0	0	15	0	NO	Peru	TUMBES	TUMBES	TUMBES	Mestizo		NO		NO				0	0	0	0	0	0	0	0	0	0	0	0	0	0					0
espr_1274	1279	0	11/23/2020	1353	1	3	2	0	1	0	NO		SI	0	0	32	1	NO	Peru	TUMBES	TUMBES	TUMBES	Mestizo		NO		NO				0	0	0	0	0	0	0	0	0	0	0	0	0	0					0
espr_1275	1280	0	11/23/2020	1353	1	3	2	0	1	0	NO		SI	0	0	27	0	NO	Peru	TUMBES	TUMBES	TUMBES	Mestizo		NO		NO				0	0	0	0	0	0	0	0	0	0	0	0	0	0					0
espr_1276	1281	3	11/23/2020	1353	1	3	2	0	1	0	NO		SI	0	2	8	1	NO	Peru	TUMBES	TUMBES	TUMBES	Mestizo		NO		NO				0	0	0	0	0	0	0	0	0	0	0	0	0	0					0
espr_1277	1282	4	11/25/2020	1369	2	8	5	0	1	0	SI		SI	2
espr_1278	1283	0	11/25/2020	1369	2	8	5	0	1	0	SI		SI	2	0	38	0		Peru	TUMBES	TUMBES	TUMBES	Mestizo		NO		NO				0	0	0	0	0	0	0	0	0	0	0	0	0	0	0	0	0	0	0
espr_1279	1284	0	11/25/2020	1369	2	8	5	0	1	0	SI		SI	2	0	20	1		Peru	TUMBES	TUMBES	TUMBES	Mestizo		NO		NO				0	0	0	0	0	0	0	0	0	0	0	0	0	0	0	0	0	0	0
espr_1280	1285	3	11/25/2020	1369	2	8	5	0	1	0	SI		SI	2	2	12	0		Peru	TUMBES	TUMBES	TUMBES	Mestizo		NO		NO				0	0	0	0	0	0	0	0	0	0	0	0	0	0	0	0	0	0	0
espr_1281	1286	0	11/25/2020	1369	2	8	5	0	1	0	SI		SI	2	0	3	0		Peru	TUMBES	TUMBES	TUMBES	Mestizo		NO		NO				0	0	0	0	0	0	0	0	0	0	0	0	0	0	0	0	0	0	0
espr_1282	1287	0	11/25/2020	1369	2	8	5	0	1	0	SI		SI	2	0	45	1		Peru	TUMBES	TUMBES	TUMBES	Mestizo		NO		NO				0	0	0	0	0	0	0	0	0	0	0	0	0	0	0	0	0	0	0
espr_1283	1288	3	11/25/2020	1369	2	8	5	0	1	0	SI		SI	2	2	18	0	SI	Peru	TUMBES	TUMBES	TUMBES	Mestizo		NO		NO				0	0	0	0	0	0	0	0	0	0	0	0	0	0					0
espr_1284	1289	4	11/25/2020	1369	2	8	5	0	1	0	SI		SI	2
espr_1285	1290	0	11/25/2020	1371	2	5	5	0	1	0	NO		SI	0	0	27	1		Peru	TUMBES	TUMBES	TUMBES	Mestizo		NO		NO				0	0	0	0	0	0	0	0	0	0	0	0	0	0	0	0	0	0	0
espr_1286	1291	0	11/25/2020	1371	2	5	5	0	1	0	NO		SI	0	0	24	0		Peru	TUMBES	TUMBES	TUMBES	Mestizo		NO		NO				0	0	0	0	0	0	0	0	0	0	0	0	0	0	0	0	0	0	0
espr_1287	1292	3	11/25/2020	1371	2	5	5	0	1	0	NO		SI	0	2	21	1		Peru	TUMBES	TUMBES	TUMBES	Mestizo		NO		NO				0	0	0	0	0	0	0	0	0	0	0	0	0	0	0	0	0	0	0
espr_1288	1293	0	11/25/2020	1371	2	5	5	0	1	0	NO		SI	0	0	19	1	NO	Peru	TUMBES	TUMBES	TUMBES	Mestizo		NO		NO				0	0	0	0	0	0	0	0	0	0	0	0	0	0	0	0	0		0
espr_1289	1294	0	11/25/2020	1371	2	5	5	0	1	0	NO		SI	0	0	18	1		Peru	TUMBES	TUMBES	TUMBES	Mestizo		NO		NO				0	0	0	0	0	0	0	0	0	0	0	0	0	0	0	0	0	0	0
espr_1290	1295	0	11/25/2020	1373	1	4	4	0	1	0	SI	11/15/2020	SI	0	0	43	1	NO	Peru	TUMBES	TUMBES	TUMBES	Mestizo		NO		NO				0	0	0	0	0	0	0	0	0	0	0	0	0	0	0	0	0		0
espr_1291	1296	2	11/25/2020	1373	1	4	4	0	1	0	SI	11/15/2020	SI	0	2	38	0	NO	Peru	TUMBES	TUMBES	TUMBES	Mestizo		NO		NO				0	0	0	0	0	0	0	0	0	0	0	0	0	0	0	0	0		0
espr_1292	1297	0	11/25/2020	1373	1	4	4	0	1	0	SI	11/15/2020	SI	0	0	11	1	NO	Peru	TUMBES	TUMBES	TUMBES	Mestizo		NO		NO				0	0	0	0	0	0	0	0	0	0	0	0	0	0					0
espr_1293	1298	0	11/25/2020	1373	1	4	4	0	1	0	SI	11/15/2020	SI	0	0	7	1	NO	Peru	TUMBES	TUMBES	TUMBES	Mestizo		NO		NO				0	0	0	0	0	0	0	0	0	0	0	0	0	0	0	0	0		0
espr_1294	1299	0	11/25/2020	1374	1	3	3	0	1	0	SI	11/15/2020	NO	0	0	28	1	NO	Peru	TUMBES	TUMBES	TUMBES	Mestizo		NO		NO				0	0	0	0	0	0	0	0	0	0	0	0	0	0	0	0	0		0
espr_1295	1300	3	11/25/2020	1374	1	3	3	0	1	0	SI	11/15/2020	NO	0	2	25	0	NO	Peru	TUMBES	TUMBES	TUMBES	Mestizo		NO		NO				0	1	0	0	0	0	0	0	0	0	0	0	0	0	0	0	0		0
espr_1296	1301	0	11/25/2020	1374	1	3	3	0	1	0	SI	11/15/2020	NO	0	0	7	1	NO	Peru	TUMBES	TUMBES	TUMBES	Mestizo		NO		NO				0	0	0	0	0	0	0	0	0	0	0	0	0	0	0	0	0		0
espr_1297	1302	0	11/23/2020	435	1	1	1	0	0	0	SI	11/19/2020	SI	0	0	57	1	NO	Peru	TUMBES	TUMBES	TUMBES	Mestizo		NO		NO				0	0	0	0	0	0	0	0	0	0	0	0	0	0					0
espr_1298	1303	0	11/23/2020	439	1	3	5	0	1	0	SI	11/19/2020	SI	0	0	43	1	NO	Peru	TUMBES	TUMBES	TUMBES	Mestizo		NO		NO				0	0	0	0	0	0	0	0	0	0	0	0	0	0					0
espr_1299	1304	0	11/23/2020	439	1	3	5	0	1	0	SI	11/19/2020	SI	0	0	38	0	NO	Peru	TUMBES	TUMBES	TUMBES	Mestizo		NO		NO				0	0	0	0	0	0	0	0	0	0	0	0	0	0					0
espr_1300	1305	3	11/23/2020	439	1	3	5	0	1	0	SI	11/19/2020	SI	0	2	14	0	NO	Peru	TUMBES	TUMBES	TUMBES	Mestizo		NO		NO				0	0	0	0	0	0	0	0	0	0	0	0	0	0					0
espr_1301	1306	2	11/24/2020	445	1	5	7	0	1	0	SI	2020-11-07	SI	0	2	75	1	NO	Peru	TUMBES	TUMBES	TUMBES	Mestizo		NO		NO				1	0	1	0	0	0	0	0	0	0	0	0	0	0	1	1	0		0
espr_1302	1307	3	11/24/2020	445	1	5	7	0	1	0	SI	2020-11-07	SI	0	2	73	0	NO	Peru	TUMBES	TUMBES	TUMBES	Mestizo		NO		NO				1	0	1	0	1	0	0	0	0	0	0	0	0	0	0	0	0		0
espr_1303	1308	0	11/24/2020	445	1	5	7	0	1	0	SI	2020-11-07	SI	0	0	29	0	NO	Peru	TUMBES	TUMBES	TUMBES	Mestizo		NO		NO				0	0	0	0	1	0	0	0	0	0	0	0	0	0	0	0	0		0
espr_1304	1309	4	11/24/2020	445	1	5	7	0	1	0	SI	2020-11-07	SI	0
espr_1305	1310	0	11/24/2020	445	1	5	7	0	1	0	SI	2020-11-07	SI	0	0	7	1	NO	Peru	TUMBES	TUMBES	TUMBES	Mestizo		NO		NO				0	0	0	0	0	0	0	0	0	0	0	0	0	0	0	0	0		0
espr_1306	1311	4	11/24/2020	450	1	4	6	0	1	0	SI	2020-11-07	SI	0
espr_1307	1312	0	11/24/2020	450	1	4	6	0	1	0	SI	2020-11-07	SI	0	0	32	1	NO	Peru	TUMBES	TUMBES	TUMBES			NO		NO				0	0	0	0	0	0	0	0	0	0	0	0	0	0	0	0	0		0
espr_1308	1313	0	11/24/2020	450	1	4	6	0	1	0	SI	2020-11-07	SI	0	0	12	1	NO	Peru	TUMBES	TUMBES	TUMBES	Mestizo		NO		NO				0	0	0	0	0	0	0	0	0	0	0	0	0	0	0	0	0		0
espr_1309	1314	0	11/24/2020	450	1	4	6	0	1	0	SI	2020-11-07	SI	0	0	10	0	NO	Peru	TUMBES	TUMBES	TUMBES	Mestizo		NO		NO				0	0	0	0	0	0	0	0	0	0	0	0	0	0	0	0	0		0
espr_1310	1315	4	11/23/2020	473	1	3	3	0	1	0	SI	11/19/2020	SI	0
espr_1311	1316	4	11/23/2020	473	1	3	3	0	1	0	SI	11/19/2020	SI	0
espr_1312	1317	4	11/23/2020	473	1	3	3	0	1	0	SI	11/19/2020	SI	0
espr_1313	1318	2	11/24/2020	477	1	4	2	0	1	0	SI	11/18/2020	NO	0	2	60	1	NO	Peru	TUMBES	TUMBES	TUMBES	Mestizo	2020-10-06	NO		NO				1	0	1	1	0	1	0	0	0	0	0	0	0	0	0	0	0		0
espr_1314	1319	0	11/24/2020	477	1	4	2	0	1	0	SI	11/18/2020	NO	0	0	24	1	NO	Peru	TUMBES	TUMBES	TUMBES	Mestizo		NO		NO				0	0	0	0	0	0	0	0	0	0	0	0	0	0	0	0	0		0
espr_1315	1320	4	11/24/2020	477	1	4	2	0	1	0	SI	11/18/2020	NO	0
espr_1316	1321	0	11/24/2020	477	1	4	2	0	1	0	SI	11/18/2020	NO	0	2	17	0	NO	Peru	TUMBES	TUMBES	TUMBES		6/17/2020	NO		NO				0	0	0	1	0	0	0	0	0	0	0	0	0	0	0	0	0		0
espr_1317	1322	0	11/23/2020	486	1	5	6	0	0	0	SI	11/19/2020	SI	0	0	39	1	NO	Peru	TUMBES	TUMBES	TUMBES	Mestizo		NO		NO				1	1	1	0	0	0	0	0	0	0	0	0	0	0	0	0	0		0
espr_1318	1323	4	11/23/2020	486	1	5	6	0	0	0	SI	11/19/2020	SI	0
espr_1319	1324	2	11/23/2020	486	1	5	6	0	0	0	SI	11/19/2020	SI	0	2	16	1	NO	Peru	TUMBES	TUMBES	TUMBES	Mestizo		NO		SI	11/23/2020			0	0	0	0	0	0	0	0	0	0	0	0	0	0					0
espr_1319	1325	2	11/23/2020	486	1	5	6	0	0	0	SI	11/19/2020	SI	0	2	16	1	NO	Peru	TUMBES	TUMBES	TUMBES	Mestizo		NO		NO				1	1	1	0	0	0	0	0	0	0	0	0	0	0	0	0	0	Escalofrios	0
espr_1320	1326	0	11/23/2020	486	1	5	6	0	0	0	SI	11/19/2020	SI	0	0	14	0	NO	Peru	TUMBES	TUMBES	TUMBES	Mestizo		NO		NO				0	0	0	0	0	0	0	0	0	0	0	0	0	0					0
espr_1321	1327	0	11/23/2020	486	1	5	6	0	0	0	SI	11/19/2020	SI	0	0	36	1	NO	Peru	TUMBES	TUMBES	TUMBES	Mestizo		NO		NO				0	0	0	0	0	0	0	0	0	0	0	0	0	0					0
espr_1322	1328	0	11/23/2020	488	1	4	4	0	1	0	SI	11/19/2020	SI	2	0	27	1	NO	Peru	TUMBES	TUMBES	TUMBES			NO		NO				0	0	0	0	0	0	0	0	0	0	0	0	0	0	0	0	0		0
espr_1323	1329	3	11/23/2020	488	1	4	4	0	1	0	SI	11/19/2020	SI	2	2	26	0	NO	Peru	TUMBES	TUMBES	TUMBES	Mestizo		NO		NO				0	0	0	0	0	0	0	0	0	0	0	0	0	0					0
espr_1324	1330	4	11/23/2020	488	1	4	4	0	1	0	SI	11/19/2020	SI	2
espr_1325	1331	4	11/23/2020	488	1	4	4	0	1	0	SI	11/19/2020	SI	2
espr_1326	1332	4	11/23/2020	512	1	4	2	0	1	0	NO		SI	0
espr_1327	1333	3	11/23/2020	512	1	4	2	0	1	0	NO		SI	0	2	42	0	NO	Peru	TUMBES	TUMBES	TUMBES	Mestizo		NO		NO				0	0	0	0	0	0	0	0	0	0	0	0	0	0					0
espr_1328	1334	3	11/23/2020	512	1	4	2	0	1	0	NO		SI	0	2	16	0	NO	Peru	TUMBES	TUMBES	TUMBES	Mestizo		NO		NO				0	0	0	0	0	0	0	0	0	0	0	0	0	0					0
espr_1329	1335	3	11/23/2020	512	1	4	2	0	1	0	NO		SI	0	2	11	1	NO	Peru	TUMBES	TUMBES	TUMBES	Mestizo		NO		NO				0	0	0	0	0	0	0	0	0	0	0	0	0	0					0
espr_1330	1336	0	11/24/2020	521	1	2	2	0	1	0	NO		NO	0	0	85	1	NO	Peru	TUMBES	TUMBES	TUMBES	Mestizo		NO		NO				0	0	0	0	0	0	0	0	0	0	0	0	0	0	0	0	0		0
espr_1331	1337	0	11/24/2020	521	1	2	2	0	1	0	NO		NO	0	0	53	1	NO	Peru	TUMBES	TUMBES	TUMBES	Mestizo	2020-04-08	NO		NO				0	0	0	0	0	0	0	0	1	1	0	0	0	0	0	0	0		37
espr_1332	1338	0	11/25/2020	524	1	3	5	0	1	0	NO		SI	0	0	47	0	NO	Peru	TUMBES	TUMBES	TUMBES	Mestizo		NO		NO				0	0	0	0	0	0	0	0	0	0	0	0	0	0	0	0	0		0
espr_1333	1339	0	11/25/2020	524	1	3	5	0	1	0	NO		SI	0	0	20	1	NO	Peru	TUMBES	TUMBES	TUMBES	Mestizo		NO		NO				0	0	0	0	0	0	0	0	0	0	0	0	0	0	0	0	0		0
espr_1334	1340	3	11/25/2020	524	1	3	5	0	1	0	NO		SI	0	2	6	1	NO	Peru	TUMBES	TUMBES	TUMBES	Mestizo		NO		NO				0	0	0	0	0	0	0	0	0	0	0	0	0	0	0	0	0		0
espr_1335	1341	4	11/24/2020	537	1	5	4	0	1	0	SI	11/18/2020	NO	0
espr_1336	1342	0	11/24/2020	537	1	5	4	0	1	0	SI	11/18/2020	NO	0	0	37	0	NO	Peru	TUMBES	TUMBES	TUMBES	Mestizo		NO		NO				0	0	0	0	0	0	0	0	0	0	0	0	0	0					0
espr_1337	1343	0	11/24/2020	537	1	5	4	0	1	0	SI	11/18/2020	NO	0	0	16	1	NO	Peru	TUMBES	TUMBES	TUMBES	Mestizo		NO		NO				0	0	0	0	0	0	0	0	0	0	0	0	0	0	0	0	0		0
espr_1338	1344	0	11/24/2020	537	1	5	4	0	1	0	SI	11/18/2020	NO	0	0	10	0	NO	Peru	TUMBES	TUMBES	TUMBES	Mestizo		NO		NO				0	0	0	0	0	0	0	0	0	0	0	0	0	0	0	0	0		0
espr_1339	1345	4	11/24/2020	537	1	5	4	0	1	0	SI	11/18/2020	NO	0
espr_1340	1346	0	11/20/2020	121	1	3	5	0	1	0	SI	11/18/2020	SI	0	0	32	1	NO	Peru	TUMBES	TUMBES	TUMBES	Mestizo		NO		NO				0	0	0	0	0	0	0	0	0	0	0	0	0	0	0	0	0		0
espr_1341	1347	0	11/20/2020	121	1	3	5	0	1	0	SI	11/18/2020	SI	0	0	33	0	NO	Peru	TUMBES	TUMBES	TUMBES	Mestizo		NO		NO				0	0	0	0	0	0	0	0	0	0	0	0	0	0	0	0	0		0
espr_1342	1348	0	11/20/2020	121	1	3	5	0	1	0	SI	11/18/2020	SI	0	0	9	0	NO	Peru	TUMBES	TUMBES	TUMBES	Mestizo		NO		NO				0	0	0	0	0	0	0	0	0	0	0	0	0	0	0	0	0		0
espr_1343	1349	3	11/25/2020	145	1	4	5	0	1	0	NO		NO	0	2	44	1	NO	Peru	TUMBES	TUMBES	TUMBES	Mestizo		NO		NO				0	0	0	0	0	0	0	0	0	0	0	0	0	0	0	0	0		0
espr_1344	1350	3	11/25/2020	145	1	4	5	0	1	0	NO		NO	0	2	33	0	NO	Peru	TUMBES	TUMBES	TUMBES	Mestizo		NO		NO				0	0	0	0	0	0	0	0	0	0	0	0	0	0	0	0	0		0
espr_1345	1351	3	11/25/2020	145	1	4	5	0	1	0	NO		NO	0	2	14	0	NO	Peru	TUMBES	TUMBES	TUMBES	Mestizo		NO		NO				0	0	0	0	0	0	0	0	0	0	0	0	0	0	0	0	0		0
espr_1346	1352	3	11/25/2020	145	1	4	5	0	1	0	NO		NO	0	2	9	0	NO	Peru	TUMBES	TUMBES	TUMBES	Mestizo		NO		NO				0	0	0	0	0	0	0	0	0	0	0	0	0	0	0	0	0		0
espr_1347	1353	2	11/25/2020	155	1	5	6	0	1	0	SI	11/15/2020	NO	0	2	43	1	NO	Peru	TUMBES	TUMBES	TUMBES	Mestizo		NO		NO				0	0	0	0	0	0	0	0	0	0	0	0	0	0	0	0	0		0
espr_1348	1354	3	11/25/2020	155	1	5	6	0	1	0	SI	11/15/2020	NO	0	2	38	0	NO	Peru	TUMBES	TUMBES	TUMBES	Mestizo		NO		NO				0	0	0	0	0	0	0	0	0	0	0	0	0	0	0	0	0		0
espr_1349	1355	4	11/25/2020	155	1	5	6	0	1	0	SI	11/15/2020	NO	0
espr_1350	1356	2	11/25/2020	155	1	5	6	0	1	0	SI	11/15/2020	NO	0	2	12	1	NO	Peru	TUMBES	TUMBES	TUMBES	Mestizo		NO		NO				0	0	0	0	0	0	0	0	0	0	0	0	0	0	0	0	0		0
espr_1351	1357	4	11/25/2020	155	1	5	6	0	1	0	SI	11/15/2020	NO	0
espr_1352	1358	0	11/20/2020	CN1	1	4	3	0	1	0	SI	11/18/2020	SI	0	0	39	1	NO	Peru	TUMBES	TUMBES	TUMBES	Otro		NO		NO				0	0	0	0	0	0	0	0	0	0	0	0	0	0	0	0	0		0
espr_1353	1359	0	11/20/2020	CN1	1	4	3	0	1	0	SI	11/18/2020	SI	0	0	55	0	NO	Peru	TUMBES	TUMBES	TUMBES	Mestizo		NO		NO				0	0	0	0	0	0	0	0	0	0	0	0	0	0	0	0	0		0
espr_1354	1360	0	11/20/2020	CN1	1	4	3	0	1	0	SI	11/18/2020	SI	0	0	23	0	NO	Peru	TUMBES	TUMBES	TUMBES	Mestizo		NO		NO				0	0	0	0	0	0	0	0	0	0	0	0	0	0	0	0	0		0
espr_1355	1361	0	11/20/2020	CN1	1	4	3	0	1	0	SI	11/18/2020	SI	0	0	16	1	NO	Peru	TUMBES	TUMBES	TUMBES	Mestizo		NO		NO				0	0	0	0	0	0	0	0	0	0	0	0	0	0	0	0	0		0
espr_1356	1362	0	11/20/2020	CN2	1	5	3	0	1	0	SI	11/18/2020	SI	0	0	69	0	SI	Peru	TUMBES	TUMBES	TUMBES	Mestizo		NO		NO				0	0	0	0	0	0	0	0	0	0	0	0	0	0	0	0	0		0
espr_1357	1363	0	11/20/2020	CN2	1	5	3	0	1	0	SI	11/18/2020	SI	0	0	46	0	SI	Peru	TUMBES	TUMBES	TUMBES	Mestizo		NO		NO				0	0	0	0	0	0	0	0	0	0	0	0	0	0	0	0	0		0
espr_1358	1364	3	11/20/2020	CN2	1	5	3	0	1	0	SI	11/18/2020	SI	0	2	26	0	SI	Peru	TUMBES	TUMBES	TUMBES	Mestizo		NO		NO				0	0	1	0	0	0	0	0	0	0	0	0	0	0	0	0	0		0
espr_1359	1365	0	11/20/2020	CN2	1	5	3	0	1	0	SI	11/18/2020	SI	0	1	19	0	NO	Peru	TUMBES	TUMBES	CORRALES	Mestizo	2020-04-07	NO		NO				1	1	1	1	1	1	0	0	1	0	0	0	0	0	0	0	0		0
espr_1359	1366	3	11/20/2020	CN2	1	5	3	0	1	0	SI	11/18/2020	SI	0	2	6	0		Peru	TUMBES	TUMBES	TUMBES	Mestizo		NO		NO				0	0	1	0	0	0	0	0	0	0	0	0	0	0	0	0	0	0	0
espr_1359	1367	2	11/20/2020	CN2	1	5	3	0	1	0	SI	11/18/2020	SI	0	2	47	0	NO	Peru	TUMBES	TUMBES	TUMBES	Mestizo		NO		NO				0	0	0	0	0	0	0	0	0	0	0	0	0	0	0	0	0		0
espr_1360	1368	0	11/20/2020	CN2	1	5	3	0	1	0	SI	11/18/2020	SI	0	0	3	1		Peru	TUMBES	TUMBES	TUMBES	Mestizo		NO		NO				0	0	0	0	0	0	0	0	0	0	0	0	0	0	0	0	0	0	0
espr_1361	1369	3	11/20/2020	CN3	1	3	4	0	0	0	NO		SI	0	2	23	1	NO	Peru	TUMBES	TUMBES	TUMBES	Mestizo		NO		NO				0	0	0	0	0	0	0	0	0	0	0	0	0	0	0	0	0		0
espr_1362	1370	0	11/20/2020	CN3	1	3	4	0	0	0	NO		SI	0	0	19	0	NO	Peru	TUMBES	TUMBES	TUMBES	Mestizo		NO		NO				0	0	0	0	0	0	0	0	0	0	0	0	0	0	0	0	0		0
espr_1363	1371	4	11/20/2020	CN3	1	3	4	0	0	0	NO		SI	0
espr_1364	1372	0	11/20/2020	CN4	1	5	3	0	1	0	SI	11/18/2020	SI	0	0	42	1	SI	Peru	TUMBES	TUMBES	TUMBES	Mestizo		NO		NO				0	0	0	0	0	0	0	0	0	0	0	0	0	0	0	0	0		0
espr_1365	1373	0	11/20/2020	CN4	1	5	3	0	1	0	SI	11/18/2020	SI	0	0	39	0	SI	Peru	TUMBES	TUMBES	TUMBES	Mestizo		NO		NO				0	0	0	0	0	0	0	0	0	0	0	0	0	0	0	0	0		0
espr_1366	1374	0	11/20/2020	CN4	1	5	3	0	1	0	SI	11/18/2020	SI	0	0	8	1	SI	Peru	TUMBES	TUMBES	TUMBES	Mestizo		NO		NO				0	0	0	0	0	0	0	0	0	0	0	0	0	0					0
espr_1367	1375	0	11/20/2020	CN4	1	5	3	0	1	0	SI	11/18/2020	SI	0	0	25	1	SI	Peru	TUMBES	TUMBES	TUMBES	Mestizo		NO		NO				0	0	0	0	0	0	0	0	0	0	0	0	0	0	0	0	0		0
espr_1368	1376	0	11/20/2020	CN4	1	5	3	0	1	0	SI	11/18/2020	SI	0	0	22	0	SI	Peru	TUMBES	TUMBES	TUMBES	Mestizo		NO		NO				0	0	0	0	0	0	0	0	0	0	0	0	0	0	0	0	0		0
espr_1369	1377	3	11/20/2020	CN5	1	5	4	0	1	0	SI	11/18/2020	SI	0	2	36	1	NO	Peru	TUMBES	TUMBES	TUMBES	Mestizo		NO		NO				0	0	0	0	0	0	0	0	0	0	0	0	0	0	0	0	0		0
espr_1370	1378	0	11/20/2020	CN5	1	5	4	0	1	0	SI	11/18/2020	SI	0	0	35	0	NO	Peru	TUMBES	TUMBES	TUMBES	Mestizo		NO		NO				0	0	0	0	0	0	0	0	0	0	0	0	0	0	0	0	0		0
espr_1371	1379	0	11/20/2020	CN5	1	5	4	0	1	0	SI	11/18/2020	SI	0	0	11	0	NO	Peru	TUMBES	TUMBES	TUMBES	Mestizo		NO		NO				0	0	0	0	0	0	0	0	0	0	0	0	0	0	0	0	0		0
espr_1372	1380	0	11/20/2020	CN5	1	5	4	0	1	0	SI	11/18/2020	SI	0	0	6	1	NO	Peru	TUMBES	TUMBES	TUMBES	Mestizo		NO		NO				0	0	0	0	0	0	0	0	0	0	0	0	0	0	0	0	0		0
espr_1373	1381	0	11/20/2020	CN5	1	5	4	0	1	0	SI	11/18/2020	SI	0	0	3	0	NO	Peru	TUMBES	TUMBES	TUMBES	Mestizo		NO		NO				0	0	0	0	0	0	0	0	0	0	0	0	0	0	0	0	0		0
espr_1374	1382	0	11/21/2020	CN6	1	3	4	0	1	0	SI	11/18/2020	SI	0	0	26	1	NO	Peru	TUMBES	TUMBES	TUMBES	Mestizo		NO		NO				0	0	0	0	0	0	0	0	0	0	0	0	0	0	0	0	0		0
espr_1375	1383	0	11/21/2020	CN6	1	3	4	0	1	0	SI	11/18/2020	SI	0	0	26	0	SI	Peru	TUMBES	TUMBES	TUMBES	Mestizo		NO		NO				0	0	0	0	0	0	0	0	0	0	0	0	0	0	0	0	0		0
espr_1376	1384	0	11/21/2020	CN6	1	3	4	0	1	0	SI	11/18/2020	SI	0	0	2	1	NO	Peru	TUMBES	TUMBES	TUMBES	Mestizo		NO		NO				0	0	0	0	0	0	0	0	0	0	0	0	0	0	0	0	0		0
espr_1377	1385	0	11/21/2020	CN7	1	1	3	0	1	0	SI	11/18/2020	SI	0	1	83	0	NO	Peru	TUMBES	TUMBES	TUMBES	Mestizo	11/21/2020	NO		NO				0	0	1	0	0	0	0	0	0	0	0	0	0	0	0	0	0		0
espr_1378	1386	3	11/21/2020	CN8	1	3	5	0	1	0	SI	11/18/2020	SI	0	2	57	1	NO	Peru	TUMBES	TUMBES	TUMBES	Mestizo		NO		NO				0	0	0	0	0	0	0	0	0	0	0	0	0	0	0	0	0		0
espr_1379	1387	2	11/21/2020	CN8	1	3	5	0	1	0	SI	11/18/2020	SI	0	2	62	0	NO	Peru	TUMBES	TUMBES	TUMBES	Mestizo		NO		NO				0	0	0	0	0	0	0	0	0	0	0	0	0	0	0	0	0		0
espr_1380	1388	0	11/21/2020	CN8	1	3	5	0	1	0	SI	11/18/2020	SI	0	0	15	0	NO	Peru	TUMBES	TUMBES	TUMBES	Mestizo		NO		NO				0	0	0	0	0	0	0	0	0	0	0	0	0	0	0	0	0		0
espr_1381	1389	0	11/21/2020	CN9	1	4	3	0	1	0	SI	11/18/2020	SI	0	0	58	0	NO	Peru	TUMBES	TUMBES	TUMBES	Mestizo		NO		NO				0	0	0	0	0	0	0	0	0	0	0	0	0	0	0	0	0		0
espr_1382	1390	0	11/21/2020	CN9	1	4	3	0	1	0	SI	11/18/2020	SI	0	0	25	0	NO	Peru	TUMBES	TUMBES	TUMBES	Mestizo		NO		NO				0	0	0	0	0	0	0	0	0	0	0	0	0	0					0
espr_1383	1391	3	11/21/2020	CN9	1	4	3	0	1	0	SI	11/18/2020	SI	0	2	2	0	NO	Peru	TUMBES	TUMBES	TUMBES	Mestizo		NO		NO				0	0	0	0	0	0	0	0	0	0	0	0	0	0					0
espr_1384	1392	4	11/21/2020	CN9	1	4	3	0	1	0	SI	11/18/2020	SI	0
espr_1385	1393	0	11/21/2020	CN10	1	3	2	0	1	0	SI	11/18/2020	SI	0	0	35	1	NO	Peru	TUMBES	TUMBES	TUMBES	Mestizo		NO		NO				0	0	0	0	0	0	0	0	0	0	0	0	0	0	0	0	0		0
espr_1386	1394	0	11/21/2020	CN10	1	3	2	0	1	0	SI	11/18/2020	SI	0	0	32	0	NO	Peru	TUMBES	TUMBES	TUMBES	Mestizo		NO		NO				0	0	0	0	0	0	0	0	0	0	0	0	0	0	0	0	0		0
espr_1387	1395	0	11/21/2020	CN10	1	3	2	0	1	0	SI	11/18/2020	SI	0	0	9	0	NO	Peru	TUMBES	TUMBES	TUMBES	Mestizo		NO		NO				0	0	0	0	0	0	0	0	0	0	0	0	0	0	0	0	0		0
espr_1388	1396	0	11/21/2020	CN11	1	2	3	0	1	0	SI	11/18/2020	SI	0	0	52	0	NO	Peru	TUMBES	TUMBES	TUMBES	Mestizo		NO		NO				1	0	1	0	0	0	0	0	0	0	0	0	0	0	0	0	0		0
espr_1389	1397	0	11/21/2020	CN11	1	2	3	0	1	0	SI	11/18/2020	SI	0	0	16	0	NO	Peru	TUMBES	TUMBES	TUMBES			NO		NO				1	0	1	0	0	0	0	0	0	0	0	0	0	0	0	0	0		0
espr_1390	1398	4	11/21/2020	CN12	1	4	5	0	1	0	SI	11/18/2020	SI	0
espr_1391	1399	2	11/21/2020	CN12	1	4	5	0	1	0	SI	11/18/2020	SI	0	2	31	0	NO	Peru	TUMBES	TUMBES	TUMBES	Mestizo		NO		SI	11/21/2020			1	0	1	0	0	0	0	0	0	0	0	0	1	0	0	0	0		0
espr_1392	1400	0	11/21/2020	CN12	1	4	5	0	1	0	SI	11/18/2020	SI	0	0	15	1	NO	Peru	TUMBES	TUMBES	TUMBES	Mestizo		NO		NO				0	0	0	0	0	0	0	0	0	0	0	0	0	0					0
espr_1393	1401	3	11/21/2020	CN12	1	4	5	0	1	0	SI	11/18/2020	SI	0	2	4	1	NO	Peru	TUMBES	TUMBES	TUMBES	Mestizo		NO		NO				0	0	0	0	0	0	0	0	0	0	0	0	0	0					0
espr_1394	1402	0	11/21/2020	CN13	1	2	5	0	1	0	SI	11/18/2020	SI	0	0	61	1	NO	Peru	TUMBES	TUMBES	TUMBES	Mestizo		NO		NO				0	0	0	0	0	0	0	0	0	0	0	0	0	0					0
espr_1395	1403	4	11/21/2020	CN13	1	2	5	0	1	0	SI	11/18/2020	SI	0
espr_1396	1404	4	11/21/2020	CN14	1	5	3	0	1	0	SI	11/18/2020	SI	0
espr_1397	1405	0	11/21/2020	CN14	1	5	3	0	1	0	SI	11/18/2020	SI	0	0	22	0	NO	Peru	TUMBES	TUMBES	TUMBES	Mestizo		NO		NO				0	0	0	0	0	0	0	0	0	0	0	0	0	0					0
espr_1398	1406	3	11/21/2020	CN14	1	5	3	0	1	0	SI	11/18/2020	SI	0	2	8	0	NO	Peru	TUMBES	TUMBES	TUMBES	Mestizo		NO		NO				0	0	0	0	0	0	0	0	0	0	0	0	0	0					0
espr_1399	1407	0	11/21/2020	CN14	1	5	3	0	1	0	SI	11/18/2020	SI	0	0	5	0	NO	Peru	TUMBES	TUMBES	TUMBES	Mestizo		NO		NO				0	0	0	0	0	0	0	0	0	0	0	0	0	0					0
espr_1400	1408	4	11/21/2020	CN14	1	5	3	0	1	0	SI	11/18/2020	SI	0
espr_1401	1409	0	11/21/2020	CN15	1	3	5	0	1	0			SI	0	0	51	1	NO	Peru	TUMBES	TUMBES	TUMBES	Mestizo		NO		NO				0	0	0	0	0	0	0	0	0	0	0	0	0	0	0	0	0		0
espr_1402	1410	0	11/21/2020	CN15	1	3	5	0	1	0			SI	0	0	51	0	NO	Peru	TUMBES	TUMBES	TUMBES	Mestizo		NO		NO				0	0	0	0	0	0	0	0	0	0	0	0	0	0	0	0	0		0
espr_1403	1411	0	11/21/2020	CN15	1	3	5	0	1	0			SI	0	0	16	1	NO	Peru	TUMBES	TUMBES	TUMBES	Mestizo		NO		NO				0	0	0	0	0	0	0	0	0	0	0	0	0	0	0	0	0		0
espr_1404	1412	0	11/23/2020	CN16	1	2	4	0	1	0	SI	11/18/2020	SI	0	0	23	1	SI	Peru	TUMBES	TUMBES	TUMBES	Mestizo		NO		NO				0	0	0	0	0	0	0	0	0	0	0	0	0	0					0
espr_1405	1413	4	11/23/2020	CN16	1	2	4	0	1	0	SI	11/18/2020	SI	0
espr_1406	1414	3	11/23/2020	CN17	1	5	5	0	1	0	SI	11/18/2020	SI	0	2	50	1	NO	Peru	TUMBES	TUMBES	TUMBES	Mestizo		NO		NO				0	0	0	0	0	0	0	0	0	0	0	0	0	0					0
espr_1407	1415	0	11/23/2020	CN17	1	5	5	0	1	0	SI	11/18/2020	SI	0	0	45	0	NO	Peru	TUMBES	TUMBES	TUMBES	Mestizo		NO		NO				0	0	0	0	0	0	0	0	0	0	0	0	0	0					0
espr_1408	1416	0	11/23/2020	CN17	1	5	5	0	1	0	SI	11/18/2020	SI	0	0	23	0	NO	Peru	TUMBES	TUMBES	TUMBES	Mestizo		NO		NO				0	0	0	0	0	0	0	0	0	0	0	0	0	0					0
espr_1409	1417	0	11/23/2020	CN17	1	5	5	0	1	0	SI	11/18/2020	SI	0	0	15	0	NO	Peru	TUMBES	TUMBES	TUMBES	Mestizo		NO		NO				0	0	0	0	0	0	0	0	0	0	0	0	0	0					0
espr_1410	1418	4	11/23/2020	CN17	1	5	5	0	1	0	SI	11/18/2020	SI	0
espr_1411	1419	0	11/23/2020	CN18	1	4	2	0	1	0	SI	11/18/2020	SI	0	0	26	1	SI	Peru	TUMBES	TUMBES	TUMBES	Mestizo		NO		NO				0	0	0	0	0	0	0	0	0	0	0	0	0	0					0
espr_1412	1420	0	11/23/2020	CN18	1	4	2	0	1	0	SI	11/18/2020	SI	0	0	25	0	SI	Peru	TUMBES	TUMBES	TUMBES	Mestizo		NO		NO				0	0	0	0	0	0	0	0	0	0	0	0	0	0					0
espr_1413	1421	0	11/23/2020	CN18	1	4	2	0	1	0	SI	11/18/2020	SI	0	0	2	0	SI	Peru	TUMBES	TUMBES	TUMBES	Mestizo		NO		NO				0	0	0	0	0	0	0	0	0	0	0	0	0	0					0
espr_1413	1422	0	11/23/2020	CN18	1	4	2	0	1	0	SI	11/18/2020	SI	0	0	2	0		Peru	TUMBES	TUMBES	TUMBES	Mestizo		NO		NO				0	0	0	0	0	0	0	0	0	0	0	0	0	0	0	0	0	0	0
espr_1414	1423	0	11/23/2020	CN18	1	4	2	0	1	0	SI	11/18/2020	SI	0	0	33	0	SI	Peru	TUMBES	TUMBES	TUMBES	Mestizo		NO		NO				0	0	0	0	0	0	0	0	0	0	0	0	0	0					0
espr_1415	1424	0	11/23/2020	CN19	1	1	2	0	1	0	SI	11/18/2020	SI	0	0	63	0	NO	Peru	TUMBES	TUMBES	TUMBES	Mestizo	10/14/2020	NO		NO				0	1	0	0	0	0	1	0	1	0	0	0	0	0	0	0	0		0
espr_1416	1425	4	11/23/2020	CN20	1	3	4	0	1	0	SI	11/18/2020	SI	0
espr_1417	1426	0	11/23/2020	CN20	1	3	4	0	1	0	SI	11/18/2020	SI	0	0	53	0	NO	Peru	TUMBES	TUMBES	TUMBES	Mestizo		NO		NO				0	0	0	0	0	0	0	0	0	0	0	0	0	0					0
espr_1418	1427	3	11/23/2020	CN20	1	3	4	0	1	0	SI	11/18/2020	SI	0	2	21	0
espr_1419	1428	3	11/23/2020	CN21	1	2	2	0	0	0			SI	0	2	27	0	NO	Peru	TUMBES	TUMBES	TUMBES	Mestizo		NO		NO				0	0	0	0	0	0	0	0	0	0	0	0	0	0					0
espr_1420	1429	0	11/23/2020	CN21	1	2	2	0	0	0			SI	0	0	6	0	NO	Peru	TUMBES	TUMBES	TUMBES	Mestizo		NO		NO				0	0	0	0	0	0	0	0	0	0	0	0	0	0					0
espr_1421	1430	0	11/23/2020	CN22	1	5	4	0	1	0	SI	11/18/2020	SI	0	0	55	1	NO	Peru	TUMBES	TUMBES	TUMBES	Mestizo		NO		NO				0	0	0	0	0	0	0	0	0	0	0	0	0	0					0
espr_1422	1431	0	11/23/2020	CN22	1	5	4	0	1	0	SI	11/18/2020	SI	0	0	43	0	NO	Peru	TUMBES	TUMBES	TUMBES	Mestizo		NO		NO				0	0	0	0	0	0	0	0	0	0	0	0	0	0					0
espr_1423	1432	0	11/23/2020	CN22	1	5	4	0	1	0	SI	11/18/2020	SI	0	0	26	0	NO	Peru	TUMBES	TUMBES	TUMBES	Mestizo		NO		NO				0	0	0	0	0	0	0	0	0	0	0	0	0	0					0
espr_1424	1433	2	11/23/2020	CN22	1	5	4	0	1	0	SI	11/18/2020	SI	0	2	12	1	NO	Peru	TUMBES	TUMBES	TUMBES	Mestizo		NO		NO				0	0	0	0	0	0	0	0	0	0	0	0	0	0					0
espr_1425	1434	4	11/23/2020	CN22	1	5	4	0	1	0	SI	11/18/2020	SI	0
espr_1426	1435	3	11/23/2020	CN23	1	4	2	0	1	0	SI	11/18/2020	SI	0	2	26	0	NO	Peru	TUMBES	TUMBES	TUMBES	Mestizo		NO		NO				0	0	0	0	0	0	0	0	0	0	0	0	0	0					0
espr_1427	1436	3	11/23/2020	CN23	1	4	2	0	1	0	SI	11/18/2020	SI	0	2	7	0	NO	Peru	TUMBES	TUMBES	TUMBES	Mestizo		NO		NO				0	0	0	0	0	0	0	0	0	0	0	0	0	0					0
espr_1428	1437	3	11/23/2020	CN23	1	4	2	0	1	0	SI	11/18/2020	SI	0	2	5	0	NO	Peru	TUMBES	TUMBES	TUMBES	Mestizo		NO		NO				0	0	0	0	0	0	0	0	0	0	0	0	0	0					0
espr_1429	1438	0	11/23/2020	CN23	1	4	2	0	1	0	SI	11/18/2020	SI	0	0	52	0	NO	Peru	TUMBES	TUMBES	TUMBES	Mestizo		NO		NO				0	0	0	0	0	0	0	0	0	0	0	0	0	0					0
espr_1430	1439	0	11/23/2020	CN24	1	3	2	0	1	0	SI	11/18/2020	SI	0	0	41	0	NO	Peru	TUMBES	TUMBES	TUMBES	Mestizo		NO		NO				0	0	0	0	0	0	0	0	0	0	0	0	0	0					0
espr_1431	1440	0	11/23/2020	CN24	1	3	2	0	1	0	SI	11/18/2020	SI	0	0	17	0	NO	Peru	TUMBES	TUMBES	TUMBES	Mestizo		DESCONOCIDO		NO				0	0	0	0	0	0	0	0	0	0	0	0	0	0	0	0	0		0
espr_1432	1441	3	11/23/2020	CN24	1	3	2	0	1	0	SI	11/18/2020	SI	0	2	3	1	NO	Peru	TUMBES	TUMBES	TUMBES	Mestizo		NO		NO				0	0	0	0	0	0	0	0	0	0	0	0	0	0					0
espr_1433	1442	0	11/23/2020	CN25	1	4	3	0	1	0	SI	11/18/2020	SI	0	0	28	0	NO	Peru	TUMBES	TUMBES	TUMBES	Mestizo		NO		NO				0	0	0	0	0	0	0	0	0	0	0	0	0	0	0	0	0		0
espr_1434	1443	0	11/23/2020	CN25	1	4	3	0	1	0	SI	11/18/2020	SI	0	0	9	1	NO	Peru	TUMBES	TUMBES	TUMBES	Mestizo		NO		NO				0	0	0	0	0	0	0	0	0	0	0	0	0	0					0
espr_1435	1444	3	11/23/2020	CN25	1	4	3	0	1	0	SI	11/18/2020	SI	0	2	38	0	NO	Peru	TUMBES	TUMBES	TUMBES	Mestizo		NO		NO				0	0	0	0	0	0	0	0	0	0	0	0	0	0					0
espr_1436	1445	3	11/23/2020	CN25	1	4	3	0	1	0	SI	11/18/2020	SI	0	2	58	1
espr_1437	1446	3	11/23/2020	CN26	1	3	3	0	1	0	SI	11/18/2020	SI	0	2	47	1	NO	Peru	TUMBES	TUMBES	TUMBES	Mestizo		NO		NO				0	0	0	0	0	0	0	0	0	0	0	0	0	0					0
espr_1438	1447	0	11/23/2020	CN26	1	3	3	0	1	0	SI	11/18/2020	SI	0	0	41	0	NO	Peru	TUMBES	TUMBES	TUMBES	Mestizo		NO		NO				0	0	0	0	0	0	0	0	0	0	0	0	0	0					0
espr_1439	1448	3	11/23/2020	CN26	1	3	3	0	1	0	SI	11/18/2020	SI	0	2	11	0	NO	Peru	TUMBES	TUMBES	TUMBES	Mestizo		NO		NO				0	0	0	0	0	0	0	0	0	0	0	0	0	0	0	0	0		0
espr_1440	1449	0	11/23/2020	CN27	1	4	3	0	1	0	SI	11/18/2020	SI	0	0	40	1	NO	Peru	TUMBES	TUMBES	TUMBES	Mestizo		NO		NO				0	0	0	0	0	0	0	0	0	0	0	0	0	0					0
espr_1441	1450	3	11/23/2020	CN27	1	4	3	0	1	0	SI	11/18/2020	SI	0	2	38	0	NO	Peru	TUMBES	TUMBES	TUMBES	Mestizo		NO		NO				0	0	0	0	0	0	0	0	0	0	0	0	0	0					0
espr_1442	1451	0	11/23/2020	CN27	1	4	3	0	1	0	SI	11/18/2020	SI	0	0	18	1	NO	Peru	TUMBES	TUMBES	TUMBES	Mestizo		NO		NO				0	0	0	0	0	0	0	0	0	0	0	0	0	0					0
espr_1443	1452	3	11/23/2020	CN27	1	4	3	0	1	0	SI	11/18/2020	SI	0	2	6	1	NO	Peru	TUMBES	TUMBES	TUMBES	Mestizo		NO		NO				0	0	0	0	0	0	0	0	0	0	0	0	0	0					0
espr_1444	1453	0	11/23/2020	CN28	1	6	2	0	1	0	SI	11/18/2020	SI	0	0	34	1	NO	Peru	TUMBES	TUMBES	TUMBES	Mestizo		NO		NO				0	0	0	0	0	0	0	0	0	0	0	0	0	0					0
espr_1445	1454	3	11/23/2020	CN28	1	6	2	0	1	0	SI	11/18/2020	SI	0	2	38	0	NO	Peru	TUMBES	TUMBES	TUMBES	Mestizo		NO		NO				0	0	0	0	0	0	0	0	0	0	0	0	0	0					0
espr_1446	1455	4	11/23/2020	CN28	1	6	2	0	1	0	SI	11/18/2020	SI	0
espr_1447	1456	0	11/23/2020	CN28	1	6	2	0	1	0	SI	11/18/2020	SI	0	2	15	0	NO	Peru	TUMBES	TUMBES	TUMBES	Mestizo		NO		NO				0	0	0	0	0	0	0	0	0	0	0	0	0	0					0
espr_1448	1457	0	11/23/2020	CN28	1	6	2	0	1	0	SI	11/18/2020	SI	0	0	9	0	NO	Peru	TUMBES	TUMBES	TUMBES	Mestizo		NO		NO				0	0	0	0	0	0	0	0	0	0	0	0	0	0					0
espr_1449	1458	3	11/23/2020	CN28	1	6	2	0	1	0	SI	11/18/2020	SI	0	2	3	0	NO	Peru	TUMBES	TUMBES	TUMBES	Mestizo		NO		NO				0	0	0	0	0	0	0	0	0	0	0	0	0	0					0
espr_1450	1459	4	11/23/2020	CN29	1	6	3	0	1	0	SI	11/18/2020	SI	0
espr_1451	1460	2	11/23/2020	CN29	1	6	3	0	1	0	SI	11/18/2020	SI	0	2	40	0	NO	Peru	TUMBES	TUMBES	TUMBES	Mestizo		NO		SI	11/23/2020			0	0	0	0	0	0	0	0	0	0	0	0	0	0					0
espr_1452	1461	0	11/23/2020	CN29	1	6	3	0	1	0	SI	11/18/2020	SI	0	0	17	0	NO	Peru	TUMBES	TUMBES	TUMBES	Mestizo		NO		NO				0	0	0	0	0	0	0	0	0	0	0	0	0	0					0
espr_1453	1462	3	11/23/2020	CN29	1	6	3	0	1	0	SI	11/18/2020	SI	0	2	15	1	NO	Peru	TUMBES	TUMBES	TUMBES	Mestizo		NO		NO				0	0	0	0	0	0	0	0	0	0	0	0	0	0					0
espr_1454	1463	3	11/23/2020	CN29	1	6	3	0	1	0	SI	11/18/2020	SI	0	2	6	0	NO	Peru	TUMBES	TUMBES	TUMBES	Mestizo		NO		NO				0	0	0	0	0	0	0	0	0	0	0	0	0	0					0
espr_1455	1464	3	11/23/2020	CN29	1	6	3	0	1	0	SI	11/18/2020	SI	0	2	6	0	NO	Peru	TUMBES	TUMBES	TUMBES	Mestizo		NO		NO				0	0	0	0	0	0	0	0	0	0	0	0	0	0					0
espr_1456	1465	4	11/23/2020	CN30	1	1	3	0	1	0	SI	11/18/2020	SI	0
espr_1457	1466	4	11/23/2020	CN31	1	4	4	0	1	0	SI	11/18/2020	SI	0
espr_1458	1467	3	11/23/2020	CN31	1	4	4	0	1	0	SI	11/18/2020	SI	0	2	32	0	NO	Peru	TUMBES	TUMBES	TUMBES	Mestizo		NO		NO				0	0	0	0	0	0	0	0	0	0	0	0	0	0					0
espr_1459	1468	0	11/23/2020	CN31	1	4	4	0	1	0	SI	11/18/2020	SI	0	0	13	1	NO	Peru	TUMBES	TUMBES	TUMBES	Mestizo		NO		NO				0	0	0	0	0	0	0	0	0	0	0	0	0	0					0
espr_1460	1469	0	11/23/2020	CN31	1	4	4	0	1	0	SI	11/18/2020	SI	0	0	7	0	NO	Peru	TUMBES	TUMBES	TUMBES	Mestizo		NO		NO				0	0	0	0	0	0	0	0	0	0	0	0	0	0					0
espr_1461	1470	1	11/23/2020	CN32	1	2	3	0	1	0	SI	11/18/2020	SI	0	2	37	1	NO	Peru	TUMBES	TUMBES	TUMBES	Mestizo		NO		SI	11/23/2020			0	0	0	0	0	0	0	0	0	0	0	0	0	0					0
espr_1462	1471	3	11/23/2020	CN32	1	2	3	0	1	0	SI	11/18/2020	SI	0	2	47	0	NO	Peru	TUMBES	TUMBES	TUMBES	Mestizo		NO		NO				0	0	0	0	0	0	0	0	0	0	0	0	0	0					0
espr_1463	1472	4	11/23/2020	CN33	1	4	3	3	1	0	SI	11/18/2020	SI	0
espr_1464	1473	0	11/23/2020	CN33	1	4	3	3	1	0	SI	11/18/2020	SI	0	0	37	0	NO	Peru	TUMBES	TUMBES	TUMBES	Mestizo		NO		NO				0	0	0	0	0	0	0	0	0	0	0	0	0	0					0
espr_1465	1474	0	11/23/2020	CN33	1	4	3	3	1	0	SI	11/18/2020	SI	0	0	17	0	NO	Peru	TUMBES	TUMBES	TUMBES	Mestizo		NO		NO				0	0	0	0	0	0	0	0	0	0	0	0	0	0					0
espr_1466	1475	0	11/23/2020	CN33	1	4	3	3	1	0	SI	11/18/2020	SI	0	0	13	1	NO	Peru	TUMBES	TUMBES	TUMBES	Mestizo		NO		NO				0	0	0	0	0	0	0	0	0	0	0	0	0	0					0
espr_1467	1476	0	11/23/2020	CN34	1	2	3	0	1	0	SI	11/18/2020	SI	0	0	25	1	NO	Peru	TUMBES	TUMBES	TUMBES	Mestizo		NO		NO				0	0	0	0	0	0	0	0	0	0	0	0	0	0					0
espr_1468	1477	0	11/23/2020	CN34	1	2	3	0	1	0	SI	11/18/2020	SI	0	0	23	0	NO	Peru	TUMBES	TUMBES	TUMBES	Mestizo		NO		NO				0	0	0	0	0	0	0	0	0	0	0	0	0	0					0
espr_1492	1478	3	10/31/2020	1641	1	2	2	0	1	0	NO		SI	1	2	67	0	NO	Peru	TUMBES	TUMBES	TUMBES	Mestizo	2020-10-06	NO		NO				0	1	0	1	0	0	0	0	1	0	0	0	0	0	0	0	0	PERDIDA APETITO	0
espr_1493	1479	0	10/31/2020	1641	1	2	2	0	1	0	NO		SI	1	0	42	1	NO	Peru	TUMBES	TUMBES	TUMBES	Mestizo		NO		NO				0	0	0	0	1	0	0	0	0	0	0	0	0	0	0	0	0		0
espr_1494	1480	4	10/31/2020	1647	1	5	2	0	1	0	NO		SI	0
espr_1495	1481	0	10/31/2020	1647	1	5	2	0	1	0	NO		SI	0	0	31	1	NO	Peru	TUMBES	TUMBES	TUMBES	Mestizo		NO		NO				0	0	0	0	0	0	0	0	0	0	0	0	0	0					0
espr_1496	1482	3	10/31/2020	1647	1	5	2	0	1	0	NO		SI	0	2	8	0	NO	Peru	TUMBES	TUMBES	TUMBES	Mestizo		NO		NO				0	0	0	0	0	0	0	0	0	0	0	0	0	0	0	0	0		0
espr_1497	1483	3	10/31/2020	1647	1	5	2	0	1	0	NO		SI	0	2	8	0	NO	Peru	TUMBES	TUMBES	TUMBES	Mestizo		NO		NO				0	0	0	0	0	0	0	0	0	0	0	0	0	0	0	0	0		0
espr_1498	1484	3	10/31/2020	1647	1	5	2	0	1	0	NO		SI	0	0	60	0	NO	Peru	TUMBES	TUMBES	TUMBES	Mestizo		NO		NO				0	0	0	0	0	0	0	0	0	0	0	0	0	0	0	0	0		0
espr_1499	1485	3	10/31/2020	1664	1	3	2	0	1	0	NO		SI	0	2	27	1	NO	Peru	TUMBES	TUMBES	TUMBES	Mestizo		NO		NO				1	0	0	0	0	0	0	0	0	0	0	0	0	0	0	0	0		0
espr_1500	1486	0	10/31/2020	1664	1	3	2	0	1	0	NO		SI	0	1	26	0	NO	Peru	TUMBES	TUMBES	TUMBES	Mestizo	2020-01-12	NO		NO				0	0	0	0	0	0	0	0	1	0	0	1	0	0	0	0	0		36
espr_1501	1487	0	10/31/2020	1664	1	3	2	0	1	0	NO		SI	0	0	5	1	NO	Peru	TUMBES	TUMBES	TUMBES	Mestizo		NO		NO				0	0	0	0	0	0	0	0	0	0	0	0	0	0	0	0	0		0
espr_1502	1488	4	2020-05-11	1681	1	3	2	0	1	0	NO		SI	0
espr_1503	1489	0	2020-05-11	1681	1	3	2	0	1	0	NO		SI	0	0	29	0	NO	Peru	TUMBES	TUMBES	TUMBES	Mestizo		NO		NO				0	0	0	0	0	0	0	0	0	0	0	0	0	0	0	0	0		0
espr_1504	1490	0	2020-05-11	1681	1	3	2	0	1	0	NO		SI	0	0	5	1	NO	Peru	TUMBES	TUMBES	TUMBES	Mestizo		NO		NO				0	0	0	0	0	0	0	0	0	0	0	0	0	0	0	0	0		0
espr_1505	1491	0	2020-02-11	1683	1	3	3	0	1	0	NO		NO	1	0	26	1	SI	Peru	TUMBES	TUMBES	TUMBES	Mestizo		NO		NO				0	0	0	0	0	0	0	0	0	0	0	0	0	0	0	0	0		0
espr_1506	1492	4	2020-02-11	1683	1	3	3	0	1	0	NO		NO	1
espr_1507	1493	4	2020-02-11	1683	1	3	3	0	1	0	NO		NO	1
espr_1508	1494	0	2020-03-11	1692	1	3	2	0	1	0	NO		NO	1	0	26	1	NO	Peru	TUMBES	TUMBES	TUMBES	Mestizo		NO		NO				0	0	0	0	0	0	0	0	0	0	0	0	0	0	0	0	0		0
espr_1509	1495	2	2020-03-11	1692	1	3	2	0	1	0	NO		NO	1	2	19	0	NO	Peru	TUMBES	TUMBES	TUMBES	Mestizo	2020-10-11	NO		SI				0	1	0	0	1	0	0	1	0	0	0	0	0	0	1	1	0		0
espr_1510	1496	4	2020-03-11	1692	1	3	2	0	1	0	NO		NO	1
espr_1511	1497	0	2020-03-11	1709	2	4	5	0	1	0	NO		NO	0	0	18	1	NO	Peru	TUMBES	TUMBES	TUMBES	Mestizo		NO		NO				0	0	0	0	0	0	0	0	0	0	0	0	0	0					0
espr_1512	1498	0	2020-03-11	1709	2	4	5	0	1	0	NO		NO	0	1	25	0	SI	Peru	TUMBES	TUMBES	TUMBES	Mestizo	11/18/2020	NO		NO				0	0	0	1	0	0	0	0	0	0	0	0	0	0	0	0	0		0
espr_1513	1499	0	2020-03-11	1709	2	4	5	0	1	0	NO		NO	0	0	27	0	SI	Peru	TUMBES	TUMBES	TUMBES	Mestizo		NO		NO				0	0	0	0	0	0	0	0	0	0	0	0	0	0					0
espr_1514	1500	2	2020-03-11	1709	2	4	5	0	1	0	NO		NO	0	2	27	1	NO	Peru	TUMBES	TUMBES	TUMBES	Otro		NO		NO				0	0	0	0	0	0	0	0	0	0	0	0	0	0	0	0	0		0
espr_1518	1501	0	2020-03-11	1709	2	4	5	0	1	0	NO		NO	0	0	28	1	NO	Peru	TUMBES	TUMBES	TUMBES	Mestizo		NO		NO				0	0	0	0	0	0	0	0	0	0	0	0	0	0					0
espr_1519	1502	0	2020-02-11	1717	1	4	2	0	1	0	NO		NO	1	0	55	1	NO	Peru	TUMBES	TUMBES	TUMBES	Mestizo		NO		NO				0	0	0	0	0	0	0	0	0	0	0	0	0	0	0	0	0		0
espr_1520	1503	0	2020-02-11	1717	1	4	2	0	1	0	NO		NO	1	0	45	0	NO	Peru	TUMBES	TUMBES	TUMBES	Mestizo		NO		NO				0	0	0	0	0	0	0	0	0	0	0	0	0	0	0	0	0		0
espr_1521	1504	0	2020-02-11	1717	1	4	2	0	1	0	NO		NO	1	1	12	1	NO	Peru	TUMBES	TUMBES	TUMBES	Mestizo	11/17/2020	NO		NO				0	0	0	1	0	0	0	0	0	0	0	0	0	0	0	0	0		0
espr_1522	1505	0	2020-02-11	1717	1	4	2	0	1	0	NO		NO	1	0	10	0	NO	Peru	TUMBES	TUMBES	TUMBES	Mestizo		NO		NO				0	0	0	0	0	0	0	0	0	0	0	0	0	0	0	0	0		0
espr_1523	1506	0	2020-02-11	1739	1	5	2	2	1	0	NO		SI	1	0	28	1	SI	Peru	TUMBES	TUMBES	TUMBES	Mestizo		NO		NO				0	0	0	0	0	0	0	0	0	0	0	0	0	0					0
espr_1524	1507	4	2020-02-11	1739	1	5	2	2	1	0	NO		SI	1
espr_1525	1508	0	2020-02-11	1739	1	5	2	2	1	0	NO		SI	1	0	10	1	SI	Peru	TUMBES	TUMBES	TUMBES	Mestizo		NO		NO				0	0	0	0	0	0	0	0	0	0	0	0	0	0					0
espr_1526	1509	0	2020-02-11	1739	1	5	2	2	1	0	NO		SI	1	0	7	1	SI	Peru	TUMBES	TUMBES	TUMBES	Mestizo		NO		NO				0	0	0	0	0	0	0	0	0	0	0	0	0	0	0	0	0		0
espr_1527	1510	0	2020-02-11	1739	1	5	2	2	1	0	NO		SI	1	0	6	0	SI	Peru	TUMBES	TUMBES	TUMBES	Mestizo		NO		NO				0	0	0	0	0	0	0	0	0	0	0	0	0	0	0	0	0		0
espr_1528	1511	0	2020-02-11	1740	1	8	2	2	1	0	NO		NO	1	0	51	1	SI	Peru	TUMBES	TUMBES	TUMBES	Mestizo		NO		NO				0	0	0	0	0	0	0	0	0	0	0	0	0	0					0
espr_1529	1512	0	2020-02-11	1740	1	8	2	2	1	0	NO		NO	1	0	49	0	SI	Peru	TUMBES	TUMBES	TUMBES	Mestizo		NO		NO				0	0	0	0	0	0	0	0	0	0	0	0	0	0					0
espr_1530	1513	4	2020-02-11	1740	1	8	2	2	1	0	NO		NO	1
espr_1531	1514	3	2020-02-11	1740	1	8	2	2	1	0	NO		NO	1	2	25	0	SI	Peru	TUMBES	TUMBES	TUMBES	Mestizo		NO		NO				0	0	0	0	0	0	0	0	0	0	0	0	0	0					0
espr_1532	1515	4	2020-02-11	1740	1	8	2	2	1	0	NO		NO	1
espr_1533	1516	4	2020-02-11	1740	1	8	2	2	1	0	NO		NO	1
espr_1534	1517	4	2020-02-11	1740	1	8	2	2	1	0	NO		NO	1
espr_1535	1518	0	2020-02-11	1740	1	8	2	2	1	0	NO		NO	1	0	5	0	SI	Peru	TUMBES	TUMBES	TUMBES	Mestizo		NO		NO				0	0	0	0	0	0	0	0	0	0	0	0	0	0	0	0	0		0
espr_1536	1519	0	2020-02-11	1746	1	9	2	2	1	0	NO		SI	1	0	48	1	SI	Peru	TUMBES	TUMBES	TUMBES	Mestizo		NO		NO				0	0	0	0	0	0	0	0	0	0	0	0	0	0	0	0	0		0
espr_1537	1520	0	2020-02-11	1746	1	9	2	2	1	0	NO		SI	1	0	33	1	SI	Peru	TUMBES	TUMBES	TUMBES	Mestizo		NO		NO				0	0	0	0	0	0	0	0	0	0	0	0	0	0	0	0	0		0
espr_1538	1521	0	2020-02-11	1746	1	9	2	2	1	0	NO		SI	1	0	9	1	SI	Peru	TUMBES	TUMBES	TUMBES	Mestizo		NO		NO				0	0	0	0	0	0	0	0	0	0	0	0	0	0					0
espr_1539	1522	0	2020-02-11	1746	1	9	2	2	1	0	NO		SI	1	0	12	0	SI	Peru	TUMBES	TUMBES	TUMBES	Mestizo		NO		NO				0	0	0	0	0	0	0	0	0	0	0	0	0	0	0	0	0		0
espr_1540	1523	0	2020-02-11	1746	1	9	2	2	1	0	NO		SI	1	0	18	0		Peru	TUMBES	TUMBES	TUMBES	Mestizo		NO		NO				0	0	0	0	0	0	0	0	0	0	0	0	0	0	0	0	0	0	0
espr_1541	1524	2	2020-02-11	1746	1	9	2	2	1	0	NO		SI	1	2	20	0	SI	Peru	TUMBES	TUMBES	TUMBES	Mestizo		NO		NO				0	0	0	0	0	0	0	0	0	0	0	0	0	0	0	0	0		0
espr_1542	1525	4	2020-02-11	1746	1	9	2	2	1	0	NO		SI	1
espr_1543	1526	0	2020-02-11	1746	1	9	2	2	1	0	NO		SI	1	0	19	1	NO	Peru	TUMBES	TUMBES	TUMBES	Mestizo		NO		NO				0	0	0	0	0	0	0	0	0	0	0	0	0	0	0	0	0		0
espr_1544	1527	0	2020-02-11	1746	1	9	2	2	1	0	NO		SI	1	0	23	1	NO	Peru	TUMBES	TUMBES	TUMBES	Mestizo		NO		NO				0	0	0	0	0	0	0	0	0	0	0	0	0	0	0	0	0		0
espr_1545	1528	0	2020-02-11	1750	1	1	2	2	1	0	NO		SI	1	0	62	1	NO	Peru	TUMBES	TUMBES	TUMBES	Mestizo		NO		NO				0	0	0	0	0	0	0	0	0	0	0	0	0	0	0	0	0		0
espr_1546	1529	4	2020-02-11	1753	1	3	2	2	1	0	NO		NO	1
espr_1547	1530	0	2020-02-11	1753	1	3	2	2	1	0	NO		NO	1	0	26	0	SI	Peru	TUMBES	TUMBES	TUMBES	Mestizo		NO		NO				0	0	0	0	0	0	0	0	0	0	0	0	0	0	0	0	0		0
espr_1548	1531	0	2020-02-11	1753	1	3	2	2	1	0	NO		NO	1	0	5	1	SI	Peru	TUMBES	TUMBES	TUMBES	Mestizo		NO		NO				0	0	0	0	0	0	0	0	0	0	0	0	0	0					0
espr_1549	1532	4	2020-02-11	1764	1	3	2	2	1	0	NO		NO	1
espr_1550	1533	2	2020-02-11	1764	1	3	2	2	1	0	NO		NO	1	2	25	0	NO	Peru	TUMBES	TUMBES	TUMBES	Mestizo	2020-09-11	NO		SI	5/26/2020	NO		1	1	1	0	0	1	0	0	1	0	0	0	1	0	0	0	0		39
espr_1551	1534	3	2020-02-11	1764	1	3	2	2	1	0	NO		NO	1	2	6	1	NO	Peru	TUMBES	TUMBES	TUMBES	Mestizo	2020-11-11	NO		NO				1	0	1	1	0	0	0	1	0	0	0	0	0	0	0	0	0		0
espr_1552	1535	4	2020-02-11	1768	1	4	2	2	1	0	NO		NO	1
espr_1553	1536	0	2020-02-11	1768	1	4	2	2	1	0	NO		NO	1	0	22	0	NO	Peru	TUMBES	TUMBES	TUMBES	Mestizo		NO		NO				0	0	0	0	0	0	0	0	0	0	0	0	0	0	0	0	0		0
espr_1554	1537	4	2020-02-11	1768	1	4	2	2	1	0	NO		NO	1
espr_1555	1538	0	2020-02-11	1768	1	4	2	2	1	0	NO		NO	1	2	1	0	NO	Peru	TUMBES	TUMBES	TUMBES	Mestizo	1/14/2021	NO		NO	1/20/2021			0	1	0	0	0	0	0	0	1	0	0	0	0	0	0	0	0	0	0
espr_1556	1539	4	2020-05-11	1781	1	2	2	2	1	0	NO		SI	1
espr_1557	1540	3	2020-05-11	1781	1	2	2	2	1	0	NO		SI	1	2	54	0		Peru	TUMBES	TUMBES	TUMBES	Mestizo	11/19/2020	NO		NO				0	0	1	0	0	0	0	0	0	0	0	0	0	0	0	0	0		0
espr_1558	1541	0	2020-05-11	1785	1	4	2	2	1	0	NO		NO	1	0	25	1	SI	Peru	TUMBES	TUMBES	TUMBES	Mestizo		NO		NO				0	0	0	0	0	0	0	0	0	0	0	0	0	0					0
espr_1559	1542	0	2020-05-11	1785	1	4	2	2	1	0	NO		NO	1	0	22	0	SI	Peru	TUMBES	TUMBES	PAMPAS DE HOSPITAL	Mestizo		NO		NO				0	0	0	0	0	0	0	0	0	0	0	0	0	0					0
espr_1560	1543	0	2020-05-11	1785	1	4	2	2	1	0	NO		NO	1	0	4	0	SI	Peru	TUMBES	TUMBES	TUMBES	Mestizo		NO		NO				0	0	0	0	0	0	0	0	0	0	0	0	0	0	0	0	0		0
espr_1561	1544	4	2020-05-11	1785	1	4	2	2	1	0	NO		NO	1
espr_1566	1545	0	2020-05-11	1785	1	4	2	2	1	0	NO		NO	1	0	38	1	NO	Peru	TUMBES	TUMBES	TUMBES	Mestizo		NO		NO				0	0	0	0	0	0	0	0	0	0	0	0	0	0					0
espr_1567	1546	0	2020-05-11	1785	1	4	2	2	1	0	NO		NO	1	0	31	1	NO	Peru	TUMBES	TUMBES	TUMBES	Mestizo		NO		NO				0	0	0	0	0	0	0	0	0	0	0	0	0	0					0
espr_1568	1547	0	2020-05-11	1785	1	4	2	2	1	0	NO		NO	1	0	17	0	NO	Peru	TUMBES	TUMBES	TUMBES	Mestizo		NO		NO				0	0	0	0	0	0	0	0	0	0	0	0	0	0					0
espr_1569	1548	0	2020-05-11	1785	1	4	2	2	1	0	NO		NO	1	0	47	0	NO	Peru	TUMBES	TUMBES	TUMBES	Mestizo		NO		NO				0	0	0	0	0	0	0	0	0	0	0	0	0	0					0
espr_1570	1549	4	2020-05-11	1785	1	4	2	2	1	0	NO		NO	1
espr_1571	1550	2	2020-02-11	1558	1	3	2	2	1	0	NO		NO	1	2	30	0	NO	Peru	TUMBES	TUMBES	TUMBES	Mestizo		NO		NO				0	0	0	0	0	0	0	0	0	0	0	0	0	0	0	0	0		0
espr_1572	1551	0	2020-02-11	1558	1	3	2	2	1	0	NO		NO	1	1	12	1	NO	Peru	TUMBES	TUMBES	TUMBES	Mestizo	11/18/2020	NO		NO				1	0	0	0	0	0	1	1	1	0	0	0	0	0	0	0	0		0
espr_1573	1552	3	2020-02-11	1558	1	3	2	2	1	0	NO		NO	1	2	9	1	NO	Peru	TUMBES	TUMBES	TUMBES	Mestizo		NO		NO				0	0	0	0	0	0	0	0	0	0	0	0	0	0	0	0	0		0
espr_1574	1553	0	2020-03-11	1557	1	5	3	2	1	0	NO		NO	1	1	31	1	NO	Peru	TUMBES	TUMBES	TUMBES	Mestizo	11/21/2020	NO		NO				0	0	1	1	1	0	0	0	0	0	0	0	0	0	0	0	0		0
espr_1575	1554	0	2020-03-11	1557	1	5	3	2	1	0	NO		NO	1	1	29	0	NO	Peru	TUMBES	TUMBES	TUMBES	Mestizo		NO		NO				0	0	0	0	0	0	0	0	0	0	0	0	0	0	0	0	0		0
espr_1576	1555	4	2020-03-11	1557	1	5	3	2	1	0	NO		NO	1
espr_1577	1556	4	2020-03-11	1557	1	5	3	2	1	0	NO		NO	1
espr_1578	1557	0	2020-03-11	1557	1	5	3	2	1	0	NO		NO	1	1	10	1	NO	Peru	TUMBES	TUMBES	TUMBES	Mestizo	11/19/2020	NO		NO				0	0	0	1	1	0	0	0	0	0	0	0	0	0	0	0	0		0
espr_1579	1558	4	2020-02-11	1551	1	4	2	2	1	0	NO		NO	2
espr_1580	1559	2	2020-03-11	417	1	5	5	0	1	0	SI	10/14/2020	SI	3	2	31	0		Peru	TUMBES	TUMBES	TUMBES	Mestizo	11/21/2020	NO		NO				0	0	0	1	1	0	0	0	0	0	0	0	0	0	0	0	0		0
espr_1581	1560	0	2020-02-11	1551	1	4	2	2	1	0	NO		NO	2	0	14	1	NO	Peru	TUMBES	TUMBES	TUMBES	Mestizo		NO		NO				0	0	0	0	0	0	0	0	0	0	0	0	0	0	0	0	0		0
espr_1582	1561	0	2020-02-11	1551	1	4	2	2	1	0	NO		NO	2	0	12	0	NO	Peru	TUMBES	TUMBES	TUMBES	Mestizo		NO		NO				0	0	0	0	0	0	0	0	0	0	0	0	0	0	0	0	0		0
espr_1583	1562	4	2020-03-11	1451	1	6	4	2	1	0	NO		NO	1
espr_1584	1563	0	2020-03-11	1451	1	6	4	2	1	0	NO		NO	1	0	39	0	NO	Peru	TUMBES	TUMBES	TUMBES	Mestizo		NO		NO				0	0	0	0	0	0	0	0	0	0	0	0	0	0	0	0	0		0
espr_1585	1564	0	2020-03-11	1451	1	6	4	2	1	0	NO		NO	1	0	22	0	NO	Peru	TUMBES	TUMBES	TUMBES	Mestizo		NO		NO				0	0	0	0	0	0	0	0	0	0	0	0	0	0	0	0	0		0
espr_1586	1565	0	2020-03-11	1451	1	6	4	2	1	0	NO		NO	1	0	8	0	NO	Peru	TUMBES	TUMBES	TUMBES	Mestizo		NO		NO				0	0	0	0	0	0	0	0	0	0	0	0	0	0	0	0	0		0
espr_1587	1566	0	2020-03-11	1451	1	6	4	2	1	0	NO		NO	1	0	2	1	NO	Peru	TUMBES	TUMBES	TUMBES	Mestizo		NO		NO				0	0	0	0	0	0	0	0	0	0	0	0	0	0	0	0	0		0
espr_1588	1567	0	2020-03-11	1451	1	6	4	2	1	0	NO		NO	1	0	81	1	NO	Peru	TUMBES	TUMBES	TUMBES	Mestizo		NO		NO				0	0	0	0	0	0	0	0	0	0	0	0	0	0	0	0	0		0
espr_1589	1568	3	2020-03-11	1470	1	3	2	2	1	0	NO		SI	2	1	37	0		Peru	TUMBES	TUMBES	TUMBES	Mestizo	11/17/2020	NO		NO				0	0	0	1	0	0	0	0	0	0	0	0	0	0	0	0	0		0
espr_1590	1569	4	2020-03-11	1470	1	3	2	2	1	0	NO		SI	2
espr_1591	1570	4	2020-03-11	1470	1	3	2	2	1	0	NO		SI	2
espr_1592	1571	0	2020-04-11	1478	1	4	4	2	1	0	NO		NO	2	0	41	1	NO	Peru	TUMBES	TUMBES	TUMBES	Mestizo		NO		NO				0	0	0	0	0	0	0	0	0	0	0	0	0	0	0	0	0		0
espr_1593	1572	0	2020-04-11	1478	1	4	4	2	1	0	NO		NO	2	0	33	0	NO	Peru	TUMBES	TUMBES	TUMBES	Mestizo		NO		NO				0	0	0	0	0	0	0	0	0	0	0	0	0	0					0
espr_1594	1573	4	2020-04-11	1478	1	4	4	2	1	0	NO		NO	2
espr_1595	1574	4	2020-04-11	1478	1	4	4	2	1	0	NO		NO	2
espr_1596	1575	4	2020-03-11	1540	1	7	5	2	1	0	NO		SI	1
espr_1597	1576	0	2020-03-11	1540	1	7	5	2	1	0	NO		SI	1	0	36	0	NO	Peru	TUMBES	TUMBES	TUMBES	Mestizo		NO		NO				0	0	0	0	0	0	0	0	0	0	0	0	0	0	0	0	0		0
espr_1598	1577	0	2020-03-11	1540	1	7	5	2	1	0	NO		SI	1	0	14	0	NO	Peru	TUMBES	TUMBES	TUMBES	Mestizo		NO		NO				0	0	0	0	0	0	0	0	0	0	0	0	0	0	0	0	0		0
espr_1599	1578	4	2020-03-11	1540	1	7	5	2	1	0	NO		SI	1
espr_1600	1579	0	2020-03-11	1540	1	7	5	2	1	0	NO		SI	1	0	7	1	NO	Peru	TUMBES	TUMBES	TUMBES	Mestizo		NO		NO				0	0	0	0	0	0	0	0	0	0	0	0	0	0	0	0	0		0
espr_1601	1580	0	2020-03-11	1540	1	7	5	2	1	0	NO		SI	1	0	5	1	NO	Peru	TUMBES	TUMBES	TUMBES	Mestizo		NO		NO				0	0	0	0	0	0	0	0	0	0	0	0	0	0	0	0	0		0
espr_1602	1581	0	2020-03-11	1540	1	7	5	2	1	0	NO		SI	1	0	3	0	NO	Peru	TUMBES	TUMBES	TUMBES	Mestizo		NO		NO				0	0	0	0	0	0	0	0	0	0	0	0	0	0	0	0	0		0
espr_1603	1582	0	2020-03-11	1476	1	2	2	2	1	0	NO		SI	2	0	38	1	NO	Peru	TUMBES	TUMBES	TUMBES	Mestizo		NO		NO				0	0	0	0	0	0	0	0	0	0	0	0	0	0					0
espr_1604	1583	4	2020-03-11	1476	1	2	2	2	1	0	NO		SI	2
espr_1605	1584	4	2020-04-11	1450	1	2	2	2	1	0	NO		SI	1
espr_1606	1585	0	2020-04-11	1450	1	2	2	2	1	0	NO		SI	1	0	22	0		Peru	TUMBES	TUMBES	TUMBES	Mestizo		NO		NO				0	0	0	0	1	0	0	0	0	0	0	0	0	0	0	0	0	0	0
espr_1607	1586	4	2020-03-11	1445	1	4	2	2	1	0	NO		NO	2
espr_1608	1587	4	2020-03-11	1445	1	4	2	2	1	0	NO		NO	2
espr_1609	1588	4	2020-03-11	1445	1	4	2	2	1	0	NO		NO	2
espr_1610	1589	2	2020-03-11	1445	1	4	2	2	1	0	NO		NO	2	1	37	0		Peru	TUMBES	TUMBES	TUMBES	Mestizo	11/17/2020	NO		NO				0	0	0	1	0	0	0	0	0	0	0	0	0	0	0	0	0	0	0
espr_1611	1590	0	2020-03-11	1503	1	5	4	2	1	0	NO		NO	2	0	42	1	NO	Peru	TUMBES	TUMBES	TUMBES	Mestizo		NO		NO				0	0	0	0	0	0	0	0	0	0	0	0	0	0	0	0	0		0
espr_1612	1591	4	2020-03-11	1503	1	5	4	2	1	0	NO		NO	2
espr_1613	1592	4	2020-03-11	1503	1	5	4	2	1	0	NO		NO	2
espr_1614	1593	4	2020-03-11	1503	1	5	4	2	1	0	NO		NO	2
espr_1615	1594	4	2020-03-11	1503	1	5	4	2	1	0	NO		NO	2
espr_1616	1595	2	2020-03-11	1426	1	4	5	0	1	0	NO		SI	1	2	34	1		Peru	TUMBES	TUMBES	TUMBES	Mestizo	11/19/2020	NO		NO				0	0	1	0	0	0	0	0	0	0	0	0	0	0	0	0	0		0
espr_1617	1596	0	2020-03-11	1426	1	4	5	0	1	0	NO		SI	1	0	25	0	NO	Peru	TUMBES	TUMBES	TUMBES	Mestizo		NO		NO				0	0	0	0	0	0	0	0	0	0	0	0	0	0	0	0	0		0
espr_1618	1597	4	2020-03-11	1426	1	4	5	0	1	0	NO		SI	1
espr_1619	1598	4	2020-03-11	1426	1	4	5	0	1	0	NO		SI	1
espr_1620	1599	0	2020-03-11	1425	1	3	2	0	1	0	NO		SI	2	0	42	1	NO	Peru	TUMBES	TUMBES	TUMBES	Mestizo		NO		NO				0	0	0	0	0	0	0	0	0	0	0	0	0	0	0	0	0		0
espr_1621	1600	0	2020-03-11	1425	1	3	2	0	1	0	NO		SI	2	0	39	0	NO	Peru	TUMBES	TUMBES	TUMBES	Mestizo		NO		NO				0	0	0	0	0	0	0	0	0	0	0	0	0	0	0	0	0		0
espr_1622	1601	0	2020-03-11	1425	1	3	2	0	1	0	NO		SI	2	0	13	0	NO	Peru	TUMBES	TUMBES	TUMBES	Mestizo		NO		NO				0	0	0	0	0	0	0	0	0	0	0	0	0	0	0	0	0		0
espr_1623	1602	0	2020-04-11	1419	1	3	2	2	1	0	NO		SI	2	0	34	1	NO	Peru	TUMBES	TUMBES	TUMBES	Mestizo		NO		NO				0	0	0	0	0	0	0	0	0	0	0	0	0	0	0	0	0		0
espr_1624	1603	0	2020-04-11	1419	1	3	2	2	1	0	NO		SI	2	0	47	0	NO	Peru	TUMBES	TUMBES	TUMBES	Mestizo		NO		NO				0	0	0	0	0	0	0	0	0	0	0	0	0	0	0	0	0		0
espr_1625	1604	0	2020-04-11	1419	1	3	2	2	1	0	NO		SI	2	0	3	1	NO	Peru	TUMBES	TUMBES	TUMBES	Mestizo		NO		NO				0	0	0	0	0	0	0	0	0	0	0	0	0	0	0	0	0		0
espr_1626	1605	0	2020-03-11	1415	1	4	4	2	1	0	NO		NO	2	0	25	1	NO	Peru	TUMBES	TUMBES	TUMBES	Mestizo		NO		NO				0	0	0	0	0	0	0	0	0	0	0	0	0	0	0	0	0		0
espr_1627	1606	3	2020-03-11	1415	1	4	4	2	1	0	NO		NO	2	2	38	0	NO	Peru	TUMBES	TUMBES	TUMBES	Mestizo		NO		NO				0	0	0	0	0	0	0	0	0	0	0	0	0	0	0	0	0		0
espr_1628	1607	4	2020-03-11	1415	1	4	4	2	1	0	NO		NO	2
espr_1629	1608	4	2020-03-11	1415	1	4	4	2	1	0	NO		NO	2
espr_1630	1609	2	2020-02-11	1390	1	3	2	2	1	0	NO		SI	1	2	49	1	NO	Peru	TUMBES	TUMBES	TUMBES	Mestizo		NO		SI	11/20/2020			0	0	0	0	0	0	0	0	0	0	0	0	0	0	0	0	0		0
espr_1631	1610	0	2020-02-11	1390	1	3	2	2	1	0	NO		SI	1	0	47	0	NO	Peru	TUMBES	TUMBES	TUMBES	Mestizo		NO		NO				0	0	0	0	0	0	0	0	0	0	0	0	0	0	0	0	0		0
espr_1632	1611	0	2020-02-11	1390	1	3	2	2	1	0	NO		SI	1	0	9	1	NO	Peru	TUMBES	TUMBES	TUMBES	Mestizo		NO		NO				0	0	0	0	0	0	0	0	0	0	0	0	0	0	0	0	0		0
espr_1633	1612	4	2020-02-11	1392	1	3	2	2	1	0	NO		NO	1
espr_1634	1613	3	2020-02-11	1392	1	3	2	2	1	0	NO		NO	1	2	21	0	NO	Peru	TUMBES	TUMBES	TUMBES		2020-10-06	NO		NO				0	1	0	1	1	1	1	1	1	0	0	0	0	0	0	0	0		0
espr_1635	1614	0	2020-02-11	1392	1	3	2	2	1	0	NO		NO	1	0	4	1	NO	Peru	TUMBES	TUMBES	TUMBES	Mestizo		NO		NO				0	0	0	0	0	0	0	0	0	0	0	0	0	0	0	0	0		0
espr_1636	1615	0	2020-02-11	1401	1	4	4	2	1	0	NO		NO	1	0	25	1	NO	Peru	TUMBES	TUMBES	TUMBES	Mestizo		NO		NO				0	0	0	0	1	0	0	0	0	0	0	0	0	0	0	0	0		0
espr_1637	1616	3	2020-02-11	1401	1	4	4	2	1	0	NO		NO	1	2	26	0	NO	Peru	TUMBES	TUMBES	TUMBES	Mestizo		NO		NO				1	0	1	0	0	0	0	0	0	0	0	0	0	0	0	0	0		0
espr_1638	1617	3	2020-02-11	1401	1	4	4	2	1	0	NO		NO	1	2	6	1	NO	Peru	TUMBES	TUMBES	TUMBES	Mestizo		NO		NO				0	0	0	0	0	0	0	0	0	0	0	0	0	0	0	0	0		0
espr_1639	1618	3	2020-02-11	1401	1	4	4	2	1	0	NO		NO	1	2	2	0	NO	Peru	TUMBES	TUMBES	TUMBES	Mestizo		NO		NO				0	0	0	0	0	0	0	0	0	0	0	0	0	0	0	0	0		0
espr_1640	1619	1	2020-02-11	1393	1	4	4	2	1	0	NO		NO	1	2	26	1	NO	Peru	TUMBES	TUMBES	TUMBES	Mestizo		NO		NO				0	0	0	0	0	0	0	0	0	0	0	0	0	0					0
espr_1641	1620	0	2020-02-11	1393	1	4	4	2	1	0	NO		NO	1	2	28	0	NO	Peru	TUMBES	TUMBES	TUMBES	Mestizo	1/31/2021	NO		NO		NO	NO	0	0	1	1	0	0	0	0	0	0	1	0	0	0	1	0	0		0
espr_1642	1621	0	2020-02-11	1393	1	4	4	2	1	0	NO		NO	1	1	24	1	SI	Peru	TUMBES	TUMBES	TUMBES	Mestizo	8/30/2020	NO		NO				0	0	0	0	0	0	0	0	1	0	0	0	0	0	0	0	0		0
espr_1643	1622	0	2020-02-11	1393	1	4	4	2	1	0	NO		NO	1	0	1	1	NO	Peru	TUMBES	TUMBES	TUMBES	Mestizo	2020-03-09	NO		NO				0	1	0	0	0	0	0	0	1	1	0	0	0	0	0	0	0	0	0
espr_16431	1623	4	2020-02-11	1393	1	4	4	2	1	0	NO		NO	1
espr_1644	1624	4	11/19/2020	CN100	1			0	1	0				0
espr_1645	1625	4	11/19/2020	CN91	1			0	1	0				0
espr_1646	1626	4	11/19/2020	CN90	1			0	1	0				0
espr_1647	1627	4	11/17/2020	CN71	1			0	1	0				0
espr_1648	1628	4	11/23/2020	CN71	1			0	1	0				0
espr_1649	1629	4	11/23/2020	CN71	1			0	1	0				0
espr_1650	1630	4	11/23/2020	CN71	1			0	1	0				0
espr_1651	1631	4	11/21/2020	CN70	1			0	1	0				0
espr_1652	1632	4	11/20/2020	CN70	1			0	1	0				0
espr_1653	1633	4	11/20/2020	CN70	1			0	1	0				0
espr_1654	1634	4	11/20/2020	CN84	1			0	1	0				0
espr_1655	1635	4		CN87	1			0	1	0				0
espr_1656	1636	4	11/20/2020	CN78	1			0	1	0				0
espr_1657	1637	4	11/21/2020	CN72	1			0	1	0				0
espr_1658	1638	4	11/21/2020	CN72	1			0	1	0				0
espr_1659	1639	4	11/21/2020	CN72	1			0	1	0				0
espr_1660	1640	4	11/17/2020	CN99	1			0	1	0				0
espr_1661	1641	4	11/18/2020	CN97	1			0	1	0				0
espr_1662	1642	4	11/20/2020	CN81	1			0	1	0				0
espr_1663	1643	4	11/23/2020	CN123	1			0	1	0				0
espr_1664	1644	4	11/16/2020	CN74	1			0	1	0				0
espr_1665	1645	4		CN88	1			0	1	0				0
espr_1666	1646	4	11/19/2020	CN111	1			0	1	0				0
espr_1667	1647	4	11/21/2020	CN94	1			0	1	0				0
espr_1668	1648	4	11/23/2020	CN128	1			0	1	0				0
espr_1669	1649	4	11/23/2020	CN128	1			0	1	0				0
espr_1670	1650	4	11/19/2020	CN96	1			0	1	0				0
espr_1671	1651	4	11/14/2020	CN73	1			0	1	0				0
espr_1672	1652	4	11/14/2020	CN73	1			0	1	0				0
espr_1673	1653	4	11/14/2020	CN73	1			0	1	0				0
espr_1674	1654	4		CN121	1			0	1	0				0
espr_1675	1655	4	11/19/2020	CN116	1			0	1	0				0
espr_1676	1656	4	11/19/2020	CN112	1			0	1	0				0
espr_1677	1657	4	11/20/2020	CN81	1			0	1	0				0
espr_1678	1658	4	11/20/2020	CN81	1			0	1	0				0
espr_1679	1659	4	11/19/2020	CN130	1			0	1	0				0
espr_1680	1660	4	11/23/2020	CN71	1			0	1	0				0
espr_1681	1661	4	11/14/2020	CN76	1			0	1	0				0
espr_1682	1662	4	11/23/2020	CN71	1			0	1	0				0
espr_1683	1663	4	11/19/2020	CN92	1			0	1	0				0
espr_1684	1664	4	11/21/2020	CN125	1			0	1	0				0
espr_1685	1665	4	11/25/2020	CN127	1			0	1	0				0
espr_1686	1666	4	11/20/2020	CN78	1			0	1	0				0
espr_1687	1667	4	11/19/2020	CN107	1			0	1	0				0
espr_1688	1668	4	11/19/2020	CN118	1			0	1	0				0
espr_1689	1669	4	11/16/2020	CN79	1			0	1	0				0
espr_1690	1670	4	11/23/2020	CN101	1			0	1	0				0
espr_1691	1671	4		CN95	1			0	1	0				0
espr_1692	1672	4	11/19/2020	CN100	1			0	1	0				0
espr_1693	1673	4	11/19/2020	CN103	1			0	1	0				0
espr_1694	1674	4	11/19/2020	CN100	1			0	1	0				0
espr_1695	1675	4		CN122	1			0	1	0				0
espr_1696	1676	4	11/19/2020	CN83	1			0	1	0				0
espr_1697	1677	4	11/21/2020	CN123	1			0	1	0				0
espr_1698	1678	4	11/21/2020	CN123	1			0	1	0				0
espr_1699	1679	4		CN88	1			0	1	0				0
espr_1700	1680	4	11/21/2020	CN123	1			0	1	0				0
espr_1701	1681	4	11/19/2020	CN90	1			0	1	0				0
espr_1702	1682	4	11/19/2020	CN90	1			0	1	0				0
espr_1703	1683	4	11/19/2020	CN90	1			0	1	0				0
espr_1704	1684	4	11/21/2020	CN125	1			0	1	0				0
espr_1705	1685	4	11/19/2020	CN92	1			0	1	0				0
espr_1706	1686	4		CN115	1			0	1	0				0
espr_1707	1687	4		CN85	1			0	1	0				0
espr_1708	1688	4		CN113	1			0	1	0				0
espr_1709	1689	4		CN85	1			0	1	0				0
espr_1710	1690	4		CN85	1			0	1	0				0
espr_1711	1691	4	11/23/2020	CN78	1			0	1	0				0
espr_1712	1692	4	11/23/2020	CN124	1			0	1	0				0
espr_1713	1693	4	11/20/2020	CN78	1			0	1	0				0
espr_1714	1694	4	11/19/2020	CN110	1			0	1	0				0
espr_1715	1695	4	11/25/2020	CN77	1			0	1	0				0
espr_1716	1696	4		CN77	1			0	1	0				0
espr_1717	1697	4	11/16/2020	CN119	1			0	1	0				0
espr_1718	1698	4	11/16/2020	CN126	1			0	1	0				0
espr_1719	1699	4	11/16/2020	CN82	1			0	1	0				0
espr_1720	1700	4	11/21/2020	CN72	1			0	1	0				0
espr_1721	1701	4	11/19/2020	CN109	1			0	1	0				0
espr_1722	1702	4	11/17/2020	CN88	1			0	1	0				0
espr_1723	1703	4	11/18/2020	CN114	1			0	1	0				0
espr_1724	1704	4	11/14/2020	CN117	1			0	1	0				0
espr_1725	1705	4	11/19/2020	CN104	1			0	1	0				0
espr_1726	1706	4	11/14/2020	CN76	1			0	1	0				0
espr_1727	1707	4	11/14/2020	CN76	1			0	1	0				0
espr_1728	1708	4	11/16/2020	CN76	1			0	1	0				0
espr_1729	1709	4	11/16/2020	CN76	1			0	1	0				0
espr_1730	1710	4	11/19/2020	CN76	1			0	1	0				0
espr_1731	1711	4		CN86	1			0	1	0				0
espr_1732	1712	4	11/14/2020	CN89	1			0	1	0				0
espr_1733	1713	4		CN80	1			0	1	0				0
espr_1734	1714	4	11/20/2020	CN84	1			0	1	0				0
espr_1735	1715	4	11/28/2020	CN120	1			0	1	0				0
espr_1736	1716	4	11/19/2020	CN98	1			0	1	0				0
espr_1737	1717	4		CN75	1			0	1	0				0
espr_1738	1718	4		CN75	1			0	1	0				0
espr_1739	1719	4		CN75	1			0	1	0				0
espr_1740	1720	4	11/14/2020	CN76	1			0	1	0				0
espr_1741	1721	4	11/25/2020	CN77	1			0	1	0				0
espr_1742	1722	4		CN74	1			0	1	0				0
espr_1743	1723	4		CN74	1			0	1	0				0
espr_1744	1724	4	11/16/2020	CN74	1			0	1	0				0
espr_1745	1725	4		CN74	1			0	1	0				0
espr_1746	1726	4	11/23/2020	CN78	1			0	1	0				0
espr_1747	1727	4		CN93	1			0	1	0				0
espr_1748	1728	4		CN93	1			0	1	0				0
espr_1749	1729	4	11/14/2020	CN105	1			0	1	0				0
espr_1750	1730	4	11/14/2020	CN102	1			0	1	0				0
espr_1751	1731	4	11/14/2020	CN105	1			0	1	0				0
espr_1752	1732	4	11/21/2020	CN78	1			0	1	0				0
espr_1753	1733	4	11/19/2020	CN108	1			0	1	0				0
espr_1754	1734	4	11/20/2020	CN84	1			0	1	0				0
espr_1755	1735	4	11/19/2020	CN106	1			0	1	0				0
espr_1756	1736	4	11/17/2020	CN129	1			0	1	0				0
espr_1757	1737	4	11/19/2020	CN89	1			0	1	0				0
espr_1758	1738	4	11/25/2020	CN77	1			0	1	0				0
espr_1759	1739	4	11/14/2020	CN102	1			0	1	0				0
espr_1760	1740	4		CN115	1			0	1	0				0
espr_1761	1741	4		CN93	1			0	1	0				0
NC0001	1742	3		1304	1	6	4	0	1	0	SI	10/15/2020	SI	0	2	27	0	NO	Peru	TUMBES	TUMBES	TUMBES	Mestizo		NO		SI	11/14/2020			0	1	0	0	0	0	0	0	0	0	0	0	0	0	0	0	0		0
NC0002	1743	3	NC0002		1			0	1	0				0	2	47	0	NO	Peru	TUMBES	TUMBES	TUMBES	Mestizo		NO		NO				0	0	0	0	0	0	0	0	0	0	0	0	0	0	0	0	0		0
NC0003	1744	3	NC0003	CN137	1			0	1	0				0	2	50	0	NO	Peru	TUMBES	TUMBES	TUMBES	Mestizo		NO		NO				0	0	0	0	0	0	0	0	0	0	0	0	0	0	0	0	0		0
NC0004	1745	3	10/29/2020	277	1	6	5	0	1	0	NO		SI	0	2	18	0	NO	Peru	TUMBES	TUMBES	TUMBES	Mestizo		NO		NO				0	0	1	0	0	0	0	0	0	0	0	0	0	0	0	0	0		0
NC0005	1746	3	NC0005	CN131	1			0	1	0				0	2	7	0	NO	Peru	TUMBES	TUMBES	TUMBES	Mestizo		NO		NO				1	0	0	0	0	0	0	0	1	0	0	0	0	0	0	0	0		0
NC0006	1747	3	NC0006	CN131	1			0	1	0				0	2	13	0	NO	Peru	TUMBES	TUMBES	TUMBES	Mestizo		NO		NO				1	0	0	0	0	0	0	0	1	0	0	0	0	0	0	0	0		0
NC0007	1748	3	NC0007		1			0	1	0				0	2	13	0	NO	Peru	TUMBES	TUMBES	TUMBES	Mestizo		NO		NO				0	0	0	0	0	0	0	0	0	0	0	0	0	0					0
NC0008	1749	3	NC0008		1			0	1	0				0	2	42	0		Peru	TUMBES	TUMBES	TUMBES	Mestizo	11/18/2020	NO		NO				0	0	0	1	0	0	0	0	0	0	0	0	0	0	0	0	0		0
NC0009	1750	3	NC0009		1			0	1	0				0	2	47	0	NO	Peru	TUMBES	TUMBES	TUMBES	Mestizo		NO		NO				0	0	0	0	0	0	0	0	0	0	0	0	0	0					0
NC0010	1751	3	NC0010		1			0	1	0				0	2	12	0	NO	Peru	TUMBES	TUMBES	TUMBES	Mestizo		NO		NO				0	0	0	0	0	0	0	0	0	0	0	0	0	0	0	0	0		0
NC0011	1752	3	NC0011	CN139	1			0	1	0				0	2	47	0	NO	Peru	TUMBES	TUMBES	TUMBES	Mestizo		NO		NO				0	0	0	0	0	0	0	0	0	0	0	0	0	0					0
NC0012	1753	2		CN110	1			0	1	0				0	2	30	0		Peru	TUMBES	TUMBES	TUMBES	Mestizo	2020-11-08	NO		NO				0	0	1	0	0	0	0	0	0	0	0	0	0	0	0	0	0		0
NC0013	1754	3	NC0013	CN132	1			0	1	0				0	2	11	0	NO	Peru	TUMBES	TUMBES	TUMBES	Mestizo		NO		NO				0	0	0	0	0	0	0	0	0	0	0	0	0	0	0	0	0		0
NC0014	1755	3	NC0014	CN132	1			0	1	0				0	2	42	0	NO	Peru	TUMBES	TUMBES	TUMBES	Mestizo		NO		NO				0	0	0	0	0	0	0	0	0	0	0	0	0	0	0	0	0		0
NC0015	1756	3	NC0015	CN134	1			0	1	0				0	2	10	0		Peru	TUMBES	TUMBES	TUMBES	Mestizo	11/19/2020	NO		NO				0	0	1	0	0	0	0	0	0	0	0	0	0	0	0	0	0		0
NC0016	1757	3	NC0016	CN134	1			0	1	0				0	2	30	0	NO	Peru	TUMBES	TUMBES	TUMBES	Mestizo		NO		NO				0	0	0	0	0	0	0	0	0	0	0	0	0	0	0	0	0		0
NC0017	1758	2	NC0017	CN138	1			0	1	0				0	2	28	0	NO	Peru	TUMBES	TUMBES	TUMBES	Mestizo		NO		NO				0	0	0	0	0	0	0	0	0	0	0	0	0	0	0	0	0		0
NC0018	1759	2	NC0018	CN138	1			0	1	0				0	2	26	0	NO	Peru	TUMBES	TUMBES	TUMBES	Mestizo		NO		NO				0	0	0	0	0	0	0	0	0	0	0	0	0	0	0	0	0		0
NC0019	1760	3	NC0019	CN131	1			0	1	0				0	2	42	0	NO	Peru	TUMBES	TUMBES	TUMBES	Mestizo		NO		NO				1	0	1	0	0	0	0	0	0	0	0	0	0	0	0	0	0		0
NC0020	1761	2	NC0020	CN133	1			0	1	0				0	2	39	0	NO	Peru	TUMBES	TUMBES	TUMBES	Mestizo		NO		NO				0	0	0	0	0	0	0	0	0	0	0	0	0	0					0
NC0021	1762	3	NC0021		1			0	1	0				0	2	51	0	NO	Peru	TUMBES	TUMBES	TUMBES	Mestizo		NO		NO				0	0	0	0	0	0	0	0	0	0	0	0	0	0					0
NC0022	1763	1			1			0	1	0				0	2	36	0	NO	Peru	TUMBES	TUMBES	TUMBES	Mestizo	2020-11-08	NO		SI	11/21/2020			0	1	0	0	0	0	0	0	0	0	0	1	0	0	0	0	0		36
NC0023	1764	3	NC0023	CN133	1			0	1	0				0	2	16	0	NO	Peru	TUMBES	TUMBES	TUMBES	Mestizo		NO		NO				0	0	0	0	0	0	0	0	0	0	0	0	0	0					0
NC0024	1765	3	NC0024		1			0	1	0				0	2	31	0	NO	Peru	TUMBES	TUMBES	TUMBES	Mestizo		NO		NO				0	0	0	0	0	0	0	0	0	0	0	0	0	0					0
NC0025	1766	3	NC0025	CN139	1			0	1	0				0	2	20	0	NO	Peru	TUMBES	TUMBES	TUMBES	Mestizo		NO		NO				0	0	0	0	0	0	0	0	0	0	0	0	0	0					0
NC0026	1767	4		CN138	1			0	1	0				0	0
NC0027	1768	3	NC0027	CN137	1			0	1	0				0	2	2	0	SI	Peru	TUMBES	TUMBES	TUMBES	Mestizo		NO		NO				0	0	0	0	0	0	0	0	0	0	0	0	0	0	0	0	0		0
NC0028	1769	3	NC0028		1			0	1	0				0	2	33	0	NO	Peru	TUMBES	TUMBES	TUMBES	Mestizo		NO		NO				1	0	1	0	0	0	0	0	0	0	0	0	0	0	0	1	0		0
NC0029	1770	3	NC0029		1			0	1	0				0	2	17	0	NO	Peru	TUMBES	TUMBES	TUMBES	Mestizo		NO		NO				0	0	0	0	0	0	0	0	0	0	0	0	0	0					0
NC0030	1771	2			1			0	1	0				0	0	29	1	NO	Peru	TUMBES	TUMBES	TUMBES	Mestizo		NO		NO				0	0	0	0	0	0	0	0	0	0	0	0	0	0	0	0	0		0
NC0031	1772	3	NC0031		1			0	1	0				0	2	23	1	SI	Peru	TUMBES	TUMBES	TUMBES	Mestizo		NO		NO				0	0	0	0	0	0	0	0	0	0	0	0	0	0	0	0	0		0
NC0032	1773	3	NC0032	CN137	1			0	1	0				0	2	14	1	NO	Peru	TUMBES	TUMBES	TUMBES	Mestizo		NO		NO				0	0	0	0	0	0	0	0	0	0	0	0	0	0	0	0	0		0
NC0033	1774	3			1			0	1	0				0	1	49	1		Peru	TUMBES	TUMBES	TUMBES	Mestizo	2020-03-06	NO		SI	2020-05-06	NO		0	1	0	0	0	1	0	0	1	0	0	0	0	0	0	0	0		0
NC0034	1775	3	NC0034		1			0	1	0				0	2	52	1	NO	Peru	TUMBES	TUMBES	TUMBES	Mestizo	2020-01-07	SI	2020-04-07	SI	2020-04-07	NO		0	1	0	0	0	1	0	0	1	0	0	0	0	0	0	0	0		0
NC0035	1776	3	NC0035	CN136	1			0	1	0				0	2	53	1		Peru	TUMBES	TUMBES	TUMBES	Mestizo	11/19/2020	NO		NO				0	0	1	0	0	0	0	0	0	0	0	0	0	0	0	0	0		0
NC0036	1777	3	10/29/2020	325	1	6	3	0	1	0	SI	10/23/2020	SI	0	2	2	1	NO	Peru	TUMBES	TUMBES	TUMBES	Mestizo		NO		NO				0	0	0	0	0	0	0	0	0	0	0	0	0	0	0	0	0		0
NC0037	1778	2	NC0037	CN138	1			0	1	0				0	2	52	1	NO	Peru	TUMBES	TUMBES	TUMBES	Mestizo		NO		NO				0	0	0	0	0	0	0	0	0	0	0	0	0	0	0	0	0		0
NC0038	1779	2	NC0038		1			0	1	0				0	2	16	1	NO	Peru	TUMBES	TUMBES	TUMBES	Mestizo		NO		SI	11/14/2020			0	0	0	0	0	0	0	0	0	0	0	0	0	0	0	0	0		0
NC0039	1780	3	NC0039		1			0	1	0				0	2	30	1	SI	Peru	TUMBES	TUMBES	TUMBES	Mestizo		NO		NO				0	0	0	0	0	0	0	0	0	0	0	0	0	0	0	0	0		0
NC0040	1781	2	NC0040	CN136	1			0	1	0				0	2	69	1	NO	Peru	TUMBES	TUMBES	TUMBES	Mestizo		NO		NO				1	0	1	0	0	1	0	0	0	0	0	0	0	0	0	0	0		0
NC0041	1782	3	NC0041		1			0	1	0				0	2	3	1	NO	Peru	TUMBES	TUMBES	TUMBES	Mestizo		NO		NO				0	0	0	0	0	0	0	0	0	0	0	0	0	0	0	0	0		0
NC0042	1783	3	NC0042	CN131	1			0	1	0				0	2	15	1	NO	Peru	TUMBES	TUMBES	TUMBES	Mestizo		NO		NO				1	0	0	0	1	0	0	0	0	0	0	0	0	0	0	0	0		0
NC0043	1784	3	NC0043	CN131	1			0	1	0				0	2	4	1	NO	Peru	TUMBES	TUMBES	TUMBES	Mestizo		NO		NO				1	0	0	0	1	0	0	0	0	0	0	0	0	0	0	0	0		0
NC0044	1785	3	NC0044	CN131	1			0	1	0				0	2	43	1	NO	Peru	TUMBES	TUMBES	TUMBES	Mestizo		NO		NO				1	0	1	0	0	0	0	0	1	0	0	0	0	0	0	0	0		0
NC0045	1786	3	NC0045	1304	1	6	4	0	1	0	SI	10/15/2020	SI	0	2	39	1	NO	Peru	TUMBES	TUMBES	TUMBES	Mestizo		NO		NO				1	1	1	0	0	0	0	0	0	0	0	0	0	0	0	0	0		0
NC0046	1787	3	NC0046		1			0	1	0				0	2	2	1	NO	Peru	TUMBES	TUMBES	TUMBES	Mestizo		NO		NO				0	0	0	0	0	0	0	0	0	0	0	0	0	0	0	0	0		0
NC0047	1788	3	NC0047		1			0	1	0				0	2	4	1	NO	Peru	TUMBES	TUMBES	TUMBES	Mestizo		NO		NO				0	0	0	0	0	0	0	0	0	0	0	0	0	0	0	0	0		0
NC0048	1789	3	NC0048		1			0	1	0				0	2	45	0	NO	Peru	TUMBES	TUMBES	TUMBES	Mestizo		NO		NO				0	0	1	0	0	0	0	0	0	0	0	0	0	0	0	0	0		0
NC0049	1790	3	10/29/2020	325	1	6	3	0	1	0	SI	10/23/2020	SI	0	2	19	0	NO	Peru	TUMBES	TUMBES	TUMBES	Mestizo		NO		NO				0	0	0	0	0	0	0	0	1	0	0	0	0	0	0	0	0		0
NC0050	1791	3	10/29/2020	277	1	6	5	0	1	0	NO		SI	0	2	45	0
NC0052	1792	3			1			0	1	0				0	2	41	0
NC0053	1793	3		CN135	1			0	1	0				0	2	4	0
NC0054	1794	3		CN135	1			0	1	0				0	2	6	0
NC0055	1795	3		CN136	1			0	1	0				0	2	61	0
NC0056	1796	3		CN135	1			0	1	0				0	2	53	1
NC0057	1797	2			1			0	1	0				0	2	2	1
espr_0003	1798	0	2020-02-11	592	1	5	3	0	1	0	NO		SI	0	1	8	0	NO	Peru	TUMBES	TUMBES	TUMBES	Mestizo	2020-11-19	NO		NO				0	0	0	1	0	0	0	0	0	0	0	0	0	0	0	0	0	0	0
espr_0004	1799	0	2020-02-11	592	1	5	3	0	1	0	NO		SI	0	1	6	0	NO	Peru	TUMBES	TUMBES	TUMBES	Mestizo	2020-11-19	NO		NO				0	0	0	1	0	0	0	0	0	0	0	0	0	0	0	0	0		0
espr_0005	1800	0	2020-02-11	592	1	5	3	0	1	0	NO		SI	0	1	4	1	NO	Peru	TUMBES	TUMBES	TUMBES	Mestizo	2020-11-19	NO		NO				0	0	0	1	0	0	0	0	0	0	0	0	0	0	0	0	0		0
espr_0007	1801	0	2020-02-11	583	1	5	5	0	1	0	SI	10/15/2020	SI	0	1	32	0	NO	Peru	TUMBES	TUMBES	TUMBES	Mestizo	2020-11-19	NO		NO				0	0	0	1	0	0	0	0	0	0	0	0	0	0	0	0	0	0	0
espr_0008	1802	0	2020-02-11	583	1	5	5	0	1	0	SI	10/15/2020	SI	0	2	22	1	NO	Peru	TUMBES	TUMBES	TUMBES	Mestizo	2020-11-14	NO		NO				0	0	0	1	0	0	0	0	0	0	0	0	0	0	0	0	0		0
espr_0010	1803	0	2020-02-11	583	1	5	5	0	1	0	SI	10/15/2020	SI	0	2	22	1	NO	Peru	TUMBES	TUMBES	TUMBES	Mestizo		NO		NO				0	0	0	0	0	0	0	0	0	0	0	0	0	0					0
espr_0011	1804	0	2020-02-11	991	1	4	3	0	1	0	NO		SI	2	0	28	0	NO	Peru	TUMBES	TUMBES	TUMBES	Mestizo	2020-06-10	NO		NO				1	0	1	1	0	0	0	0	0	0	0	0	0	0	0	0	0		0
espr_0021	1805	0	2020-02-11	994	1	6	4	0	1	0	NO		SI	0	2	41	1	NO	Peru	TUMBES	TUMBES	TUMBES	Mestizo		NO		NO				1	1	0	0	0	0	0	0	0	0	0	0	0	0	0	0	0		0
espr_0026	1806	0	2020-02-11	994	1	6	4	0	1	0	NO		SI	0	0	35	1	SI	Peru	TUMBES	TUMBES	TUMBES	Mestizo		NO		NO				0	0	0	0	0	0	0	0	0	0	0	0	0	0					0
espr_0037	1807	0	2020-02-11	886	1	5	4	0	1	0	SI	10/28/2020	SI	0	0	22	0	NO	Peru	TUMBES	TUMBES	TUMBES	Mestizo		NO		NO				0	0	0	0	0	0	0	0	0	0	0	0	0	0					0
espr_0055	1808	0	2020-02-11	958	2	6	4	0	1	0	SI	10/15/2020	SI	0	2	44	1	NO	Peru	TUMBES	TUMBES	TUMBES	Mestizo		NO		NO				0	1	1	0	0	0	0	0	0	0	0	0	0	0	0	0	0		0
espr_0065	1809	0	2020-02-11	824	1	6	6	0	1	0	SI	10/17/2020	NO	0	0	27	0	NO	Peru	TUMBES	TUMBES	TUMBES	Mestizo	2020-07-31	NO		NO				0	1	1	0	0	0	0	0	0	0	0	0	0	0	0	0	0		0
espr_0089	1810	0	2020-02-11	968	1	5	2	0	1	0	NO		NO	2	2	35	1	NO	Peru	TUMBES	TUMBES	TUMBES	Mestizo		NO		NO				0	0	0	0	0	0	0	0	0	0	0	0	0	0					0
espr_0122	1811	0	2020-04-11	696	1	5	6	0	1	0	NO		NO	2	1	0	1	NO	Peru	TUMBES	TUMBES	TUMBES	Mestizo	2020-07-07	NO		NO				0	0	0	0	0	0	0	0	1	0	0	0	0	0	0	0	0	0	0
espr_0129	1812	0	2020-04-11	939	1	3	4	0	1	0	NO		NO	3	2	33	1	SI	Peru	TUMBES	TUMBES	TUMBES	Mestizo		NO		NO				0	0	0	0	0	0	0	0	0	0	0	0	0	0					0
espr_0142	1813	0	2020-04-11	702	1	4	5	0	1	0	NO		SI	0	2	5	1	NO	Peru	TUMBES	TUMBES	TUMBES	Mestizo	2020-11-19	NO		NO				0	0	0	1	0	0	0	0	0	0	0	0	0	0	0	0	0		0
espr_0198	1814	0	2020-03-11	580	1	4	3	0	1	0	NO		NO	0	0	30	1		Peru	TUMBES	TUMBES	TUMBES	Mestizo		NO		NO				0	0	0	0	0	0	0	0	0	0	0	0	0	0	0	0	0	0	0
espr_0200	1815	0	2020-06-11	634	1	6	3	0	1	0	NO		NO	0	2	39	1	NO	Peru	TUMBES	TUMBES	TUMBES	Mestizo		NO		NO				0	0	0	0	0	0	0	0	0	0	0	0	0	0	0	0	0		0
espr_0246	1816	0	10/31/2020	889	1	5	6	0	1	0	SI	10/23/2020	NO	0	0	27	1	NO	Peru	TUMBES	TUMBES	TUMBES	Mestizo		NO		NO				0	0	0	0	0	0	0	0	0	0	0	0	0	0					0
espr_0267	1817	0	10/30/2020	779	1	7	6	0	1	0	SI	10/15/2020	NO	0	2	32	1		Peru	TUMBES	TUMBES	TUMBES	Mestizo		NO		NO				0	0	0	0	0	0	0	0	0	0	0	0	0	0	0	0	0	0	0
espr_0288	1818	0	10/30/2020	777	1	8	8	0	1	0	SI	10/15/2020	NO	0	0	53	1		Peru	TUMBES	TUMBES	TUMBES	Mestizo		NO		NO				0	0	0	0	0	0	0	0	0	0	0	0	0	0	0	0	0	0	0
espr_0295	1819	0	10/30/2020	797	1	4	3	0	1	0	SI	10/13/2020	SI	0	2	20	1	NO	Peru	TUMBES	TUMBES	TUMBES	Mestizo		NO		NO				0	0	0	0	0	0	0	0	0	0	0	0	0	0					0
espr_0302	1820	0	10/30/2020	795	1	4	3	0	1	0	SI	10/13/2020	SI	0	2	50	1	NO	Peru	TUMBES	TUMBES	TUMBES	Mestizo	2020-11-21	NO		NO				0	0	0	1	0	0	0	0	0	0	0	0	0	0	0	0	0		0
espr_0312	1821	0	10/31/2020	639	1	2	4	0	1	0	NO		NO	0	2	0	1	NO	PERU	TUMBES	TUMBES	TUMBES	Mestizo		NO		NO				0	0	0	0	0	0	0	0	0	0	0	0	0	0	0	0	0	0	0
espr_0318	1822	0	10/31/2020	700	1	4	5	1	1	0	NO		NO	2	2	26	1	NO	Peru	TUMBES	TUMBES	TUMBES			NO		NO				0	0	0	0	0	0	0	0	0	0	0	0	0	0					0
espr_0339	1823	0	10/31/2020	965	1	7	7	0	1	0	SI	10/15/2020	SI	2	0	19	0	NO	Peru	TUMBES	TUMBES	TUMBES	Mestizo		NO		NO				0	0	0	0	0	0	0	0	0	0	0	0	0	0	0	0	0		0
espr_0340	1824	0	10/31/2020	828	1	1	1	0	1	0	NO		NO	3	0	49	1	NO	Peru	TUMBES	TUMBES	TUMBES			NO		NO				0	0	0	0	0	0	0	0	0	0	0	0	0	0					0
espr_0346	1825	0	10/30/2020	598	1	3	5	0	1	0	SI	10/15/2020	SI	0	2	15	1	NO	Peru	TUMBES	TUMBES	TUMBES	Mestizo		NO		NO				0	0	0	0	0	0	0	0	0	0	0	0	0	0					0
espr_0357	1826	0	10/31/2020	617	1	5	5	0	1	0	NO		SI	2	0	57	0	NO	Peru	TUMBES	TUMBES	TUMBES	Mestizo	2020-07-10	NO		NO				0	1	1	1	0	0	0	0	1	0	0	0	0	0	0	0	0		0
espr_0361	1827	0	10/31/2020	617	1	5	5	0	1	0	NO		SI	2	1	36	0	NO	Peru	TUMBES	TUMBES	TUMBES	Mestizo	2020-11-16	NO		NO				0	1	1	1	0	0	0	0	0	0	0	0	0	0	0	0	0		0
espr_0364	1828	0	10/31/2020	629	1	3	2	0	1	0	SI	10/25/2020	SI	0	0	46	1	NO	Peru	PIURA	HUANCABAMBA	HUANCABAMBA			NO		NO				0	0	0	0	0	0	0	0	0	0	0	0	0	0					0
espr_0367	1829	0	10/31/2020	874	1	6	4	0	1	0	NO		NO	0	2	20	1	NO	Peru	TUMBES	TUMBES	PAMPAS DE HOSPITAL			NO		NO				0	0	0	0	0	0	0	0	0	0	0	0	0	0					0
espr_0381	1830	0	10/31/2020	823	1	3	4	0	1	0	SI	10/23/2020	SI	0	2	18	1		Peru	TUMBES	TUMBES	TUMBES	Mestizo		NO		NO				0	0	0	0	0	0	0	0	0	0	0	0	0	0	0	0	0	0	0
espr_0389	1831	0	10/31/2020	738	1	4	4	0	1	0	SI	10/20/2020	SI	0	2	41	1	NO	Peru	TUMBES	TUMBES	TUMBES	Mestizo		NO		NO				0	0	0	0	0	0	0	0	0	0	0	0	0	0	0	0	0		0
espr_0424	1832	0	10/31/2020	835	1	5	4	0	1	0	SI	10/20/2020	NO	0	1	47	0	NO	Peru	TUMBES	TUMBES	TUMBES	Mestizo	2020-11-17	NO		NO				0	0	0	1	0	0	0	0	0	0	0	0	0	0	0	0	0		0
espr_0425	1833	0	10/31/2020	835	1	5	4	0	1	0	SI	10/20/2020	NO	0	1	19	0	NO	Peru	TUMBES	TUMBES	TUMBES	Mestizo	2020-11-17	NO		NO				0	0	0	1	0	0	0	0	0	0	0	0	0	0	0	0	0		0
espr_0427	1834	0	10/31/2020	835	1	5	4	0	1	0	SI	10/20/2020	NO	0	2	28	1	NO	Peru	TUMBES	TUMBES	TUMBES	Mestizo		NO		NO				0	0	0	0	0	0	0	0	0	0	0	0	0	0	0	0	0		0
espr_0468	1835	0	2020-02-11	716	1	4	4	0	1	0	NO		NO	0	0	41	0	NO	Peru	TUMBES	TUMBES	TUMBES	Mestizo		NO		NO				0	0	0	0	0	0	0	0	0	0	0	0	0	0	0	0	0		0
espr_0528	1836	0	2020-02-11	961	1	5	4	0	1	0	SI	2020-11-01	SI	0	0	32	1	NO	Peru	TUMBES	TUMBES	TUMBES	Mestizo		NO		NO				0	0	0	0	0	0	0	0	0	0	0	0	0	0					0
espr_0548	1837	0	2020-05-11	1514	1	3	3	0	1	0	SI	10/20/2020	SI	2	1	40	0	NO	Peru	TUMBES	TUMBES	TUMBES	Mestizo	2020-11-17	NO		NO				0	0	0	1	0	0	0	0	0	0	0	0	0	0	0	0	0		0
espr_0550	1838	0	2020-05-11	1514	1	3	3	0	1	0	SI	10/20/2020	SI	2	2	34	1	NO	Peru	TUMBES	TUMBES	TUMBES	Mestizo		NO		NO				0	0	0	0	0	0	0	0	0	0	0	0	0	0					0
espr_0567	1839	0	2020-05-11	284	1	1	1	0	1	0	NO		NO	0	2	52	1	NO	Peru	TUMBES	TUMBES	TUMBES	Mestizo		NO		NO				0	0	0	0	0	0	0	0	0	0	0	0	0	0					0
espr_0572	1840	0	2020-06-11	187	1	5	3	0	1	0	SI	10/15/2020	NO	0	2	30	0	NO	Peru	TUMBES	TUMBES	TUMBES	Mestizo	2020-08-11	NO		NO				0	0	1	0	0	0	0	0	0	0	0	0	0	0	0	0	0		0
espr_0574	1841	0	2020-06-11	187	1	5	3	0	1	0	SI	10/15/2020	NO	0	2	29	0	NO	Peru	TUMBES	TUMBES	TUMBES	Mestizo		NO		NO				0	0	0	0	0	0	0	0	0	0	0	0	0	0	0	0	0		0
espr_0576	1842	0	2020-06-11	187	1	5	3	0	1	0	SI	10/15/2020	NO	0	0	30	0	NO	Peru	TUMBES	TUMBES	TUMBES	Mestizo		NO		NO				0	0	0	0	0	0	0	0	0	0	0	0	0	0	0	0	0		0
espr_0596	1843	0	10/31/2020	1808	1	5	6	0	1	0	SI	10/20/2020	SI	0	2	46	1	NO	Peru	TUMBES	TUMBES	TUMBES	Mestizo		NO		NO				0	0	0	0	0	0	0	0	0	0	0	0	0	0					0
espr_0598	1844	0	10/31/2020	1808	1	5	6	0	1	0	SI	10/20/2020	SI	0	0	27	0	NO	Peru	TUMBES	TUMBES	TUMBES	Mestizo	2020-10-28	NO		NO				0	0	0	1	0	0	0	0	0	0	0	0	0	0	0	0	0		0
espr_0599	1845	0	10/31/2020	1808	1	5	6	0	1	0	SI	10/20/2020	SI	0	0	27	1	NO	Peru	TUMBES	TUMBES	TUMBES		2020-07-24	NO		NO				0	0	0	0	0	0	0	0	0	0	0	0	0	0	0	0	0		0
espr_0630	1846	0	10/31/2020	1805	1	5	3	0	1	0	NO		SI	2	0	47	1	SI	Peru	TUMBES	TUMBES	TUMBES	Mestizo		NO		NO				0	0	0	0	0	0	0	0	0	0	0	0	0	0					0
espr_0631	1847	0	10/31/2020	1805	1	5	3	0	1	0	NO		SI	2	2	0	1	SI	Peru	TUMBES	TUMBES	TUMBES	Mestizo	2020-07-12	SI	2020-07-12	SI	2020-07-12			0	0	0	0	0	0	0	0	0	0	0	0	0	0	0	0	0		1
espr_0641	1848	0	10/29/2020	188	1	3	3	0	1	0	SI	10/23/2020	SI	0	1	79	1	NO	Peru	TUMBES	TUMBES	TUMBES	Mestizo	2020-11-17	NO		NO				0	0	0	1	0	0	0	0	0	0	0	0	0	0	0	0	0		0
espr_0643	1849	0	10/29/2020	188	1	3	3	0	1	0	SI	10/23/2020	SI	0	0	23	1	NO	Peru	TUMBES	TUMBES	TUMBES	Mestizo		NO		NO				0	0	0	0	0	0	0	0	0	0	0	0	0	0					0
espr_0651	1850	0	10/29/2020	179	2	9	7	0	1	0	SI	10/15/2020	SI	0	0	35	1	NO	Peru	PIURA	HUANCABAMBA	HUANCABAMBA			NO		NO				0	0	0	0	0	0	0	0	0	0	0	0	0	0					0
espr_0657	1851	0	10/29/2020	179	2	9	7	0	1	0	SI	10/15/2020	SI	0	1	48	0	NO	Peru	TUMBES	TUMBES	TUMBES	Mestizo	2020-11-20	NO		NO				0	0	0	1	0	0	0	0	0	0	0	0	0	0	0	0	0		0
espr_0674	1852	0	10/29/2020	183	1	2	2	0	1	0	NO		SI	0	1	54	0	NO	Peru	TUMBES	TUMBES	TUMBES	Mestizo	2020-11-19	NO		NO				0	0	0	1	0	0	0	0	0	0	0	0	0	0	0	0	0		0
espr_0680	1853	0	10/30/2020	387	1	5	4	0	1	0	SI	10/15/2020	SI	0	0	28	0		Peru	TUMBES	TUMBES	TUMBES	Mestizo		NO		NO				0	0	0	0	0	0	0	0	0	0	0	0	0	0	0	0	0	0	0
espr_0684	1854	0	10/29/2020	270	1	3	3	0	1	0	NO		NO	0	2	48	0		Peru	TUMBES	TUMBES	TUMBES	Mestizo		NO		NO				0	0	0	0	0	0	0	0	0	0	0	0	0	0	0	0	0	0	0
espr_0690	1855	0	10/29/2020	219	1	4	3	0	1	0	SI	10/15/2020	SI	0	0	44	1	NO	Peru	TUMBES	TUMBES	TUMBES	Mestizo		NO		NO				0	0	0	0	0	0	0	0	0	0	0	0	0	0					0
espr_0691	1856	0	10/31/2020	1465	1	4	4	0	1	0	SI	2020-03-01	SI	2	0	26	1	NO	Peru	TUMBES	TUMBES	TUMBES	Mestizo		NO		NO				0	0	0	0	0	0	0	0	0	0	0	0	0	0					0
espr_0698	1857	0	10/29/2020	223	1	6	4	0	1	0	SI	10/15/2020	SI	0	1	9	0	NO	Peru	TUMBES	TUMBES	TUMBES	Mestizo	2020-11-19	NO		NO				0	0	0	1	0	0	0	0	0	0	0	0	0	0	0	0	0		0
espr_0700	1858	0	10/29/2020	223	1	6	4	0	1	0	SI	10/15/2020	SI	0	2	38	0	NO	Peru	TUMBES	TUMBES	TUMBES	Mestizo		NO		NO				0	0	0	0	0	0	0	0	0	0	0	0	0	0					0
espr_0703	1859	0	10/29/2020	259	1	3	4	0	1	0	SI	10/15/2020	SI	0	1	61	1	NO	Peru	TUMBES	TUMBES	TUMBES	Mestizo	2020-11-19	NO		NO				0	0	0	1	0	0	0	0	0	0	0	0	0	0	0	0	0		0
espr_0708	1860	0	10/29/2020	254	1	6	4	0	1	0	NO		SI	0	1	10	0	NO	Peru	TUMBES	TUMBES	TUMBES	Mestizo	2020-11-19	NO		NO				0	0	0	1	0	0	0	0	0	0	0	0	0	0	0	0	0		0
espr_0709	1861	0	10/29/2020	254	1	6	4	0	1	0	NO		SI	0	1	3	1	NO	Peru	TUMBES	TUMBES	TUMBES	Mestizo	2020-11-19	NO		NO				0	0	0	1	0	0	0	0	0	0	0	0	0	0	0	0	0		0
espr_0710	1862	0	10/29/2020	254	1	6	4	0	1	0	NO		SI	0	0	37	1	NO	Peru	TUMBES	TUMBES	TUMBES	Mestizo		NO		NO				0	0	0	0	0	0	0	0	0	0	0	0	0	0	0	0	0		0
espr_0726	1863	0	10/31/2020	346	1	3	3	0	1	0	SI	11/19/2020	NO	0	0	34	1	NO	Peru	TUMBES	TUMBES	TUMBES	Mestizo		DESCONOCIDO		NO				0	0	0	0	0	0	0	0	0	0	0	0	0	0	0	0	0		0
espr_0757	1864	0	10/31/2020	1652	1	5	3	0	1	0	SI	11/18/2020	NO	0	0	27	1	NO	Peru	TUMBES	TUMBES	TUMBES	Mestizo		NO		NO				0	0	0	0	0	0	0	0	0	0	0	0	0	0					0
espr_0770	1865	0	2020-02-11	123	2	7	5	0	1	0	SI	2020-09-01	SI	0	1	56	1	NO	Peru	TUMBES	TUMBES	TUMBES	Mestizo	2020-11-19	NO		NO				0	0	0	1	0	0	0	0	0	0	0	0	0	0	0	0	0		0
espr_0773	1866	0	2020-02-11	123	2	7	5	0	1	0	SI	2020-09-01	SI	0	2	62	0	NO	Peru	TUMBES	TUMBES	TUMBES	Mestizo		NO		NO				0	0	0	0	0	0	0	0	0	0	0	0	0	0					0
espr_0777	1867	0	2020-02-11	116	1	5	3	0	1	0	SI	10/18/2020	NO	0	0	20	1	NO	Peru	TUMBES	TUMBES	TUMBES			NO		NO				0	0	0	0	0	0	0	0	0	0	0	0	0	0					0
espr_0781	1868	0	2020-02-11	116	1	5	3	0	1	0	SI	10/18/2020	NO	0	2	66	1	NO	Peru	TUMBES	TUMBES	TUMBES	Mestizo	2020-11-16	NO		NO				0	0	0	1	0	0	0	0	0	0	0	0	0	0	0	0	0		0
espr_0794	1869	0	2020-02-11	1003	1	4	4	0	1	0	SI	2020-02-01	SI	1	1	30	0	NO	Peru	TUMBES	TUMBES	TUMBES	Mestizo	2020-11-19	NO		NO				0	0	0	1	0	0	0	0	0	0	0	0	0	0	0	0	0		0
espr_0795	1870	0	2020-02-11	1003	1	4	4	0	1	0	SI	2020-02-01	SI	1	1	12	0	NO	Peru	TUMBES	TUMBES	TUMBES	Mestizo	2020-11-19	NO		NO				0	0	0	1	0	0	0	0	0	0	0	0	0	0	0	0	0		0
espr_0796	1871	0	2020-02-11	1003	1	4	4	0	1	0	SI	2020-02-01	SI	1	1	8	1	NO	Peru	TUMBES	TUMBES	TUMBES	Mestizo	2020-11-19	NO		NO				0	0	0	1	0	0	0	0	0	0	0	0	0	0	0	0	0		0
espr_0807	1872	0	2020-02-11	13	1	4	2	0	1	0	NO		NO	0	1	29	0	NO	Peru	TUMBES	TUMBES	TUMBES	Mestizo	2020-11-19	NO		NO				0	0	0	1	0	0	0	0	0	0	0	0	0	0	0	0	0		0
espr_0809	1873	0	2020-02-11	13	1	4	2	0	1	0	NO		NO	0	1	62	0	NO	Peru	TUMBES	TUMBES	TUMBES	Mestizo	2020-11-19	NO		NO				0	0	0	1	0	0	0	0	0	0	0	0	0	0	0	0	0		0
espr_0824	1874	0	2020-02-11	1343	1	7	4	0	1	0	NO		NO	2	1	19	0	NO	Peru	TUMBES	TUMBES	TUMBES	Mestizo	2020-11-19	NO		NO				0	0	0	1	0	0	0	0	0	0	0	0	0	0	0	0	0		0
espr_0829	1875	0	2020-02-11	81	1	3	4	0	1	0	NO		SI	2	1	44	0	NO	Peru	TUMBES	TUMBES	TUMBES	Mestizo	2020-11-19	NO		NO				0	0	0	1	0	0	0	0	0	0	0	0	0	0	0	0	0		0
espr_0840	1876	0	2020-02-11	120	1	4	5	0	1	0	SI	10/15/2020	SI	0	1	16	1	NO	Peru	TUMBES	TUMBES	TUMBES	Mestizo	2020-11-19	NO		NO				0	0	0	1	0	0	0	0	0	0	0	0	0	0	0	0	0		0
espr_0864	1877	0	2020-04-11	549	1	6	4	0	1	0	SI	2019-12-12	SI	0	2	35	1	NO	Peru	TUMBES	TUMBES	TUMBES	Mestizo		NO		NO				0	0	0	0	0	0	0	0	0	0	0	0	0	0					0
espr_0902	1878	0	2020-04-11	1318	1	3	4	0	1	1	NO			0	0	22	0	NO	Peru	TUMBES	TUMBES	TUMBES	Mestizo	2020-08-08	NO		NO				0	0	0	0	0	1	0	0	1	0	0	0	0	0	0	0	0		0
espr_0906	1879	0	2020-03-11	572	1	5	3	0	1	0	SI	10/23/2020	SI	0	0	19	0		Peru	TUMBES	TUMBES	TUMBES	Mestizo		NO		NO				0	0	0	0	0	0	0	0	0	0	0	0	0	0	0	0	0	0	0
espr_0912	1880	0	2020-03-11	1320	1	5	3	0	1	0	SI	10/15/2020	SI	2	1	0	0	NO	Peru	TUMBES	TUMBES	TUMBES	Mestizo	2020-11-13	NO		NO				0	0	0	0	0	0	0	0	1	0	0	0	0	0	0	0	0	0	0
espr_0915	1881	0	2020-03-11	1320	1	5	3	0	1	0	SI	10/15/2020	SI	2	0	47	1	NO	Peru	TUMBES	TUMBES	TUMBES	Mestizo		NO		NO				0	0	0	0	0	0	0	0	0	0	0	0	0	0					0
espr_0920	1882	0	2020-03-11	1159	1	5	6	0	1	0	SI	2020-10-10	SI	0	0	26	1		Peru	TUMBES	TUMBES	TUMBES	Mestizo		NO		NO				0	0	0	0	0	0	0	0	0	0	0	0	0	0	0	0	0	0	0
espr_0925	1883	0	2020-03-11	1252	1	5	6	0	1	0	NO		SI	0	1	10	1		Peru	TUMBES	TUMBES	TUMBES	Mestizo	2020-12-05	NO		NO				1	0	1	0	0	0	0	0	0	0	0	0	0	0	0	0	0	0	0
espr_0935	1884	0	2020-02-11	1551	1	4	2	2	1	0	NO		NO	2	1	4	1	NO	Peru	TUMBES	TUMBES	TUMBES	Mestizo	2020-11-19	NO		NO				0	0	1	0	0	0	0	0	0	0	0	0	0	0	0	0	0		0
espr_0957	1885	0	2020-05-11	1130	1	5	3	0	1	0	NO		SI	0	0	37	1	NO	Peru	TUMBES	TUMBES	TUMBES		2020-07-24	NO		NO				0	0	0	0	0	0	0	0	0	0	0	0	0	0	0	0	0		0
espr_0959	1886	0	2020-05-11	1130	1	5	3	0	1	0	NO		SI	0	0	36	1	NO	Peru	TUMBES	TUMBES	TUMBES	Mestizo		NO		NO				0	0	0	0	0	0	0	0	0	0	0	0	0	0					0
espr_0975	1887	0	2020-06-11	515	1	2	5	0	1	0	SI	10/20/2020	SI	0	1	69	1	NO	Peru	TUMBES	TUMBES	TUMBES	Mestizo	2020-11-19	NO		NO				0	0	0	1	0	0	0	0	0	0	0	0	0	0	0	0	0		0
espr_0987	1888	0	2020-06-11	469	1	5	5	0	1	0	NO		SI	0	2	44	0	NO	Peru	TUMBES	TUMBES	TUMBES	Mestizo		NO		NO				0	0	0	0	0	0	0	0	0	0	0	0	0	0	0	0	0		0
espr_0996	1889	0	10/30/2020	419	1	7	4	0	1	0	NO		SI	0	1	26	0	SI	Peru	TUMBES	TUMBES	TUMBES	Mestizo	2020-11-17	NO		NO				0	0	0	1	0	0	0	0	0	0	0	0	0	0	0	0	0	0	0
espr_0997	1890	0	10/30/2020	419	1	7	4	0	1	0	NO		SI	0	1	8	0	SI	Peru	TUMBES	TUMBES	TUMBES	Mestizo	2020-11-17	NO		NO				0	0	0	1	0	0	0	0	0	0	0	0	0	0	0	0	0	0	0
espr_0998	1891	0	10/30/2020	419	1	7	4	0	1	0	NO		SI	0	1	5	0		Peru	TUMBES	TUMBES	TUMBES	Mestizo	2020-11-17	NO		NO				0	0	1	0	0	0	0	0	0	0	0	0	0	0	0	0	0	0	0
espr_1001	1892	0	10/30/2020	419	1	7	4	0	1	0	NO		SI	0	2	38	1	NO	Peru	TUMBES	ZARUMILLA	AGUAS VERDES	Mestizo		NO		NO				0	0	0	0	0	0	0	0	0	0	0	0	0	0					0
espr_1016	1893	0	10/29/2020	91	1	5	6	0	1	0	SI	10/25/2020	SI	0	2	49	1		Peru	TUMBES	TUMBES	TUMBES	Mestizo		NO		NO				0	0	0	0	0	0	0	0	0	0	0	0	0	0	0	0	0	0	0
espr_1026	1894	0	10/30/2020	542	1	5	4	0	1	0	SI	10/20/2020	SI	0	0	46	1	NO	Peru	TUMBES	TUMBES	TUMBES	Mestizo		NO		NO				0	0	0	0	0	0	0	0	0	0	0	0	0	0	0	0	0		0
espr_1052	1895	0	10/31/2020	1017	1	7	5	0	1	0	SI	10/20/2020	SI	0	2	28	1	NO	Peru	TUMBES	TUMBES	TUMBES		2020-07-24	NO		NO				0	0	0	0	0	0	0	0	0	0	0	0	0	0	0	0	0		0
espr_1080	1896	0	10/30/2020	401	1	6	2	0	1	0	NO		NO	0	0	35	0	NO	Peru	TUMBES	TUMBES	TUMBES			NO		NO				0	0	0	0	0	0	0	0	0	0	0	0	0	0					0
espr_1081	1897	0	10/30/2020	401	1	6	2	0	1	0	NO		NO	0	2	21	1		Peru	TUMBES	TUMBES	TUMBES	Mestizo		NO		NO				0	0	0	0	0	0	0	0	0	0	0	0	0	0	0	0	0	0	0
espr_1103	1898	0	10/29/2020	118	1	9	5	0	1	0	SI	10/19/2020	NO	0	2	50	1	NO	Peru	TUMBES	TUMBES	TUMBES	Mestizo		NO		NO				0	0	0	0	0	0	0	0	0	0	0	0	0	0					0
espr_1117	1899	0	10/29/2020	37	1	3	4	1	1	0	NO		NO	0	2	23	1		Peru	TUMBES	TUMBES	TUMBES	Mestizo		NO		NO				0	0	0	0	0	0	0	0	0	0	0	0	0	0	0	0	0	0	0
espr_1132	1900	0	10/31/2020	1084	1	5	3	0	1	0	SI	10/23/2020	SI	0	2	49	1	NO	Peru	TUMBES	TUMBES	TUMBES	Mestizo		NO		NO				0	0	0	0	0	0	0	0	0	0	0	0	0	0					0
espr_1148	1901	0	10/29/2020	85	1	6	5	0	1	0	SI	10/23/2020	SI	0	0	39	0	NO	Peru	TUMBES	TUMBES	TUMBES		2020-02-18	NO		NO				1	0	1	1	0	0	0	0	0	0	0	0	0	0	0	0	0		38
espr_1151	1902	0	10/29/2020	85	1	6	5	0	1	0	SI	10/23/2020	SI	0	2	55	1	NO	Peru	TUMBES	TUMBES	TUMBES	Mestizo		NO		NO				0	0	0	0	0	0	0	0	0	0	0	0	0	0	0	0	0		0
espr_1166	1903	0	10/30/2020	504	1	4	5	0	1	0	SI	10/15/2020	SI	0	1	63	0	NO	Peru	TUMBES	TUMBES	TUMBES	Mestizo	2020-11-19	NO		NO				0	0	0	1	0	0	0	0	0	0	0	0	0	0	0	0	0	0	0
espr_1167	1904	0	10/30/2020	504	1	4	5	0	1	0	SI	10/15/2020	SI	0	1	38	1	NO	Peru	TUMBES	TUMBES	TUMBES	Mestizo	2020-11-19	NO		NO				0	0	0	1	0	0	0	0	0	0	0	0	0	0	0	0	0		0
espr_1169	1905	0	10/30/2020	504	1	4	5	0	1	0	SI	10/15/2020	SI	0	1	16	0	NO	Peru	TUMBES	TUMBES	TUMBES	Mestizo	2020-11-19	NO		NO				0	0	0	1	0	0	0	0	0	0	0	0	0	0	0	0	0	0	0
espr_1199	1906	0	10/29/2020	125	1	5	4	0	1	0	NO		SI	0	0	19	0	NO	Peru	TUMBES	TUMBES	TUMBES	Mestizo		NO		NO				0	0	0	0	0	0	0	0	0	0	0	0	0	0	0	0	0		0
espr_1205	1907	0	10/31/2020	545	1	4	6	0	1	0	SI	10/20/2020	SI	2	2	36	1	NO	Peru	TUMBES	TUMBES	TUMBES	Mestizo		NO		NO				0	0	0	0	0	0	0	0	0	0	0	0	0	0	0	0	0		0
espr_1210	1908	0	10/29/2020	66	1	4	3	0	1	0	SI	10/15/2020	SI	0	0	43	0	NO	Peru	TUMBES	TUMBES	TUMBES	Mestizo		NO		NO				0	0	0	0	0	0	0	0	0	0	0	0	0	0	0	0	0	0	0
espr_1225	1909	0	10/30/2020	1304	1	6	4	0	1	0	SI	10/15/2020	SI	0	2	0	1	NO	Peru	TUMBES	TUMBES	TUMBES	Mestizo		NO		SI	2020-08-20			0	0	0	0	0	0	0	0	0	0	0	0	0	0	0	0	0	0	0
espr_1231	1910	0	11/25/2020	1178	1	4	2	0	1	0	NO		NO	2	1	55	1	SI	Peru	TUMBES	TUMBES	TUMBES	Mestizo	2020-11-25	NO		NO				0	0	0	1	0	0	0	0	0	0	0	0	0	0	0	0	0	0	0
espr_1251	1911	0	11/25/2020	1304	1	6	4	0	1	0	SI	10/15/2020	SI	0	2	27	0	NO	Peru	TUMBES	TUMBES	TUMBES	Mestizo		NO		SI	2020-11-14			0	0	0	0	0	0	0	0	0	0	0	0	0	0	0	0	0		0
espr_1277	1912	0	11/25/2020	1369	2	8	5	0	1	0	SI		SI	2	2	53	1	NO	Peru	TUMBES	TUMBES	TUMBES	Mestizo	2020-11-17	NO		NO				0	0	0	1	0	0	0	0	0	0	0	0	0	0	0	0	0		0
espr_1306	1913	0	11/24/2020	450	1	4	6	0	1	0	SI	2020-11-07	SI	0	0	43	0	NO	Peru	TUMBES	TUMBES	TUMBES	Mestizo		NO		NO				0	0	0	0	0	0	0	0	0	0	0	0	0	0	0	0	0		0
espr_1310	1914	0	11/23/2020	473	1	3	3	0	1	0	SI	11/19/2020	SI	0	1	54	1	NO	Peru	TUMBES	TUMBES	TUMBES	Mestizo	2020-11-23	NO		NO				0	0	0	1	0	0	0	0	0	0	0	0	0	0	0	0	0		0
espr_1324	1915	0	11/23/2020	488	1	4	4	0	1	0	SI	11/19/2020	SI	2	1	6	1	NO	Peru	TUMBES	TUMBES	TUMBES	Mestizo	2020-11-23	NO		NO				0	0	0	1	0	0	0	0	0	0	0	0	0	0	0	0	0		0
espr_1326	1916	0	11/23/2020	512	1	4	2	0	1	0	NO		SI	0	0	55	1	NO	Peru	TUMBES	TUMBES	TUMBES	Mestizo	2020-04-15	NO		NO				0	0	0	1	0	1	0	0	0	0	0	0	0	0	0	0	0		37
espr_1351	1917	0	11/25/2020	155	1	5	6	0	1	0	SI	11/15/2020	NO	0	2	27	1		Peru	TUMBES	TUMBES	TUMBES	Mestizo		NO		NO				0	0	0	0	0	0	0	0	0	0	0	0	0	0	0	0	0	0	0
espr_1416	1918	0	11/23/2020	CN20	1	3	4	0	1	0	SI	11/18/2020	SI	0	2	18	1	NO	Peru	TUMBES	TUMBES	TUMBES	Mestizo		NO		NO				0	0	0	0	0	0	0	0	0	0	0	0	0	0					0
espr_1425	1919	0	11/23/2020	CN22	1	5	4	0	1	0	SI	11/18/2020	SI	0	1	61	1	NO	Peru	TUMBES	TUMBES	TUMBES	Mestizo		NO		NO				0	0	0	0	0	0	0	0	0	0	0	0	0	0				DOLOR DE ESPALDA	0
espr_1510	1920	0	2020-03-11	1692	1	3	2	0	1	0	NO		NO	1	0	27	1	NO	Peru	TUMBES	TUMBES	TUMBES			NO		NO				0	0	0	0	0	0	0	0	0	0	0	0	0	0	0	0	0		0
espr_1533	1921	0	2020-02-11	1740	1	8	2	2	1	0	NO		NO	1	0	45	1		Peru	TUMBES	TUMBES	TUMBES	Mestizo		NO		NO				0	0	0	0	0	0	0	0	0	0	0	0	0	0	0	0	0	0	0
espr_1546	1922	0	2020-02-11	1753	1	3	2	2	1	0	NO		NO	1	0	33	0		Peru	TUMBES	TUMBES	TUMBES	Mestizo	2020-02-05	NO		NO				1	0	1	0	0	0	0	0	0	0	0	0	0	0	0	0	0	0	38
espr_1556	1923	0	2020-05-11	1781	1	2	2	2	1	0	NO		SI	1	0	61	1	NO	Peru	TUMBES	TUMBES	TUMBES	Mestizo		NO		NO				0	0	0	0	0	0	0	0	0	0	0	0	0	0					0
espr_1561	1924	0	2020-05-11	1785	1	4	2	2	1	0	NO		NO	1	2	40	0	NO	Peru	TUMBES	TUMBES	TUMBES	Mestizo		NO		NO				0	0	0	0	0	0	0	0	0	0	0	0	0	0	0	0	0		0
espr_1570	1925	0	2020-05-11	1785	1	4	2	2	1	0	NO		NO	1	2	8	1	NO	Peru	TUMBES	TUMBES	TUMBES	Mestizo	2020-11-17	NO		NO				0	0	0	1	0	0	0	0	0	0	0	0	0	0	0	0	0		0
espr_1576	1926	0	2020-03-11	1557	1	5	3	2	1	0	NO		NO	1	2	63	0	NO	Peru	TUMBES	TUMBES	TUMBES	Mestizo	2020-11-17	NO		NO				1	0	0	1	0	0	0	0	1	0	0	0	0	0	1	1	0		0
espr_1579	1927	0	2020-02-11	1551	1	4	2	2	1	0	NO		NO	2	0	0	0		Peru	TUMBES	TUMBES	TUMBES	Mestizo		NO		NO				0	0	0	0	0	0	0	0	0	0	0	0	0	0	0	0	0	0	0
espr_1596	1928	0	2020-03-11	1540	1	7	5	2	1	0	NO		SI	1	2	44	1	NO	Peru	TUMBES	TUMBES	TUMBES	Mestizo		NO		NO				0	0	0	0	0	0	0	0	0	0	0	0	0	0					0
espr_1629	1929	0	2020-03-11	1415	1	4	4	2	1	0	NO		NO	2	0	64	1	NO	Peru	TUMBES	TUMBES	TUMBES		2020-06-10	NO		NO				1	0	1	1	0	0	0	0	1	0	0	0	0	0	0	0	0		0
[truncated: 39 more columns]

## Sheet: Hoja2
GLOSARIO
KEY	SELF-GENERATOR OF THIS STUDY
ORD	Order number from 1 to 1929
res_prev	Prevalence 0=negative (negative rapid test), 1 (positive IGM), 2 (positive IgM/IgG), 3 (positive IgG)
fecha entr	Interview date
casa	House number
tipo fam	Family type. 1 : unifamiliar, 2: multifamiliar
nro_habitan	Number of inhabitants
nro_habitac	Number of rooms
abast_agu	Water supply. 0= public, 1=neighbor, 2 = common pipe, 3=water tank
almac_agua	Water storage. 0=no, 1=yes
febriles	Febriles. 0=no, 1=yes
rec_piriprox	Received insecticide. 0=no, 1=yes
fec_recibe	Insecticide reception date
sabe_uso_piriprox	Knows how to use insecticide, 0=no, 1=yes
sshh:	Sanitary facilities. 0=bathroom, 1=latrine, 2=artisanal latrine, 3=does not have
clasifif	Disease status. 0=ruled out, 1=suspected, 2=confirmed
edad	Age
sexo	Sex. 0=female, 1=male
Migrante	Migrant. 0=no, 1=yes
pais_residencia	Country of residence
DEPARTAMENTO	Department of residence
PROVINCIA	Province of residence
DISTRITO	District of residence
Etnia	Ethnicity. 1= Afro-descendants, 2= mestizo, and 3= other
fe_ini	Symptom onset date
hospitalizacion	Hospitalization. 1=yes, 2=no, 3=unknown
Fecha_hosp	Hospitalization date
aislamiento	Isolation. 0=no, 1=yes
fecha_ais	Isolation date
ventilacion	Ventilation. 0=no, 1=yes
neumonia	Pneumonia. 0=no, 1=yes
fiebre	Feber. 0=no, 1=yes
malestar	Discomfort. 0=no, 1=yes
tos	Cough. 0=no, 1=yes
garganta	Throat pain. 0=no, 1=yes
congestion	Nasal congestion. 0=no, 1=yes
respiratoria	Respiratory difficulty. 0=no, 1=yes
diarrea	Diarrhea. 0=no, 1=yes
nauseas	Nausea. 0=no, 1=yes
cefalea	Headache. 0=no, 1=yes
irritabilidad	Irritability. 0=no, 1=yes
muscular	Muscle pain. 0=no, 1=yes
abdominal	Abdominal pain. 0=no, 1=yes
pecho	Chest pain. 0=no, 1=yes
articulaciones	Articulations pain. 0=no, 1=yes
anosmia	Anosmia. 0=no, 1=yes
ageusia	Ageusia. 0=no, 1=yes
oido	Earache. 0=no, 1=yes
otros_sintomas	Other symptoms. 0=no, 1=yes
temperatura	Temperature. 0=no, 1=yes
exudado	Exudate. 0=no, 1=yes
conjuntival	Conjunctival. 0=no, 1=yes
convulsion	Convulsion. 0=no, 1=yes
coma	Medical coma. 0=no, 1=yes
disnea	Dyspnoea. 0=no, 1=yes
auscultacion	Auscultation. 0=no, 1=yes
rxpulmonar	Lung X-ray. 0=no, 1=yes
otros_signos	Other signs. 0=no, 1=yes
embarazo	Pregnancy. 0=no, 1=yes
trimestre	Trimester. 0=no, 1=yes
postparto	Postpartum. 0=no, 1=yes
cardiovascular	Heart disease. 0=no, 1=yes
diabetes	Diabetes. 0=no, 1=yes
hepatica	Liver disease. 0=no, 1=yes
neurologica	neurological disease. 0=no, 1=yes
inmunodeficiencia	Immunodeficiency.0=no, 1=yes
renal	Renal.0=no, 1=yes
hepatico	Hepatic.0=no, 1=yes
pulmonar	Pulmonary.0=no, 1=yes
cancer	Cancer.0=no, 1=yes
obesidad	Obesity.0=no, 1=yes
tbc	Tuberculosis.0=no, 1=yes
asma	Asthma.0=no, 1=yes
otros_comorbilidad	Other comorbidities
ocupacion	Occupation.
otra_ocupacion	Other occupation.
fecha_mue0	Sampling date 0.
prueba0	Test type 0.
resultado0	Test result 0.
fecha_mue1	Sample collection date 1.
prueba1	Test type 1
resultado1	Test 1 result.
fecha_rap	Date rapid test.
prueba_rap	Rapid test type.
resultado_rap	Rapid test result.
fecha_rap1	Rapid test date 1.
prueba_rap1	Rapid test type 1.
resultado_rap1	Rapid test result 1.
asintomatico	Asymptomatic.
